# Supplementary material
Source: PubMed Central journal article supplement (PMC8190692)
Supplement: jamapsychiatry-e211221-s001.pdf [file jamapsychiatry-e211221-s001.pdf]

1 **Supplement 1**

2  
3  
4  
5  
6  
7  
8  
9  
10  
11  
12  
13  
14

1. Funder (PCORI)-approved Research Strategy, including complete statistical analysis plan
2. Full study protocol submitted to, and approved by, the University of Massachusetts Amherst Institutional Review Board (November 2017)
3. Summary of a formal modification to the PCORI contract (September 2018), and the full revised study protocol (1<sup>st</sup> revision) submitted to, and approved by, the University of Massachusetts Amherst Institutional Review Board (March 2018)
4. Summary of a formal modification to the PCORI contract (January 2018); no revision to the study protocol

## Funder (PCORI)-approved Research Strategy, including complete statistical analysis plan

### PCORI RESEARCH PLAN TEMPLATE RESEARCH STRATEGY

#### A. Background

Mental illness is the leading cause of combined death and disability for all women and for men ages 15-44 years; it is the 2<sup>nd</sup> highest cause of combined death and disability for all men<sup>1,2,3</sup>. Mental illnesses frequently co-occur with general medical problems<sup>4,5</sup>, and negatively influence the course and treatment of these medical conditions. Mental illnesses are the 5<sup>th</sup> most expensive health problem in the United States<sup>6</sup>; however, when taking into account lost productivity, depression alone is *the* most expensive<sup>7</sup>. Mark et al.<sup>8</sup> demonstrated that mental health care (MHC) accounts for 6.2% of the nation's *direct* health expenditures. Indirect costs are even more staggering; individuals with untreated mental illness have more emergency room costs and early mortality than individuals with treated mental illness<sup>9,10</sup>. Adults with, versus without, mental illness are less likely to be employed<sup>11</sup>. When employed, there is more frequent absenteeism, reduced productivity, more days of disability, and more job-related accidents<sup>12,13,7</sup>. Annually, more than 33 million Americans seek care for mental health problems<sup>1</sup>, and many millions who need help do not seek or receive it<sup>14</sup>. When untreated, most mental health issues worsen or wax and wane; some become chronic<sup>15</sup>. *The evidence is overwhelming: mental illness is an extraordinary public health problem and highly burdensome to individuals, families, employers, communities, and the health care system.*

Disturbingly, even when people receive MHC, it is often substandard<sup>1,16</sup>. Research has consistently demonstrated that approximately 10-15% of patients will deteriorate or experience harm during treatment<sup>17,18,19,20</sup>. Further, when deterioration rates are combined with no-change rates (i.e., ineffective treatment), the number is strikingly higher (over 60%)<sup>17</sup>. These estimates are largely derived from naturalistic, patient-focused research studies where routine outcome data have been collected on numerous patients and providers. Importantly, research has consistently identified significant variability in skill and outcomes between therapists<sup>21,22,23</sup>, *even when therapists utilize an empirically supported treatment (EST)*. In fact, differences between treatment providers account for a greater portion of treatment outcome variance than the specific interventions delivered in controlled trials<sup>24,25</sup>. Thus, *improvements in MHC can occur by identifying effective providers in addition to promoting ESTs*<sup>24</sup>. In the largest study to date on this topic, our team investigated therapists' naturalistic treatment outcomes over many different problem domains (e.g., depression, anxiety, substance use, mania, sleep) in a sample of 6,960 patients and nearly 700 providers<sup>17</sup>. The majority of therapists demonstrated a differential pattern of effectiveness depending on the problem domain, and therapist domain-specific effectiveness correlated poorly across domains suggesting that therapist competencies may be domain-specific, rather than reflecting a core attribute or general underlying therapeutic skill. Importantly, although some therapists demonstrated effectiveness over multiple problem domains, *no therapists demonstrated reliable effectiveness across all domains*. Further, a small, but notable 4% of the therapists did not demonstrate effective outcomes on any domain. These data suggest that in any population of therapists (payer network, hospital, or community mental health system), there is an opportunity for behavioral health to do what medicine did decades ago—encourage provider specialization. Virtually every clinician has an area where they are above average (82-96%)<sup>17,26</sup>, and our research suggests that if they specialize to their unique skills, population-level outcomes (i.e., symptom reduction, behavior change, increased functionality) will improve dramatically. This would reflect a major, and likely highly impactful shift to current MHC systems.

*However, patients and referrers are typically unaware of the unique track record (“Report Cards”) of local-area providers, which represents a critical gap in knowledge transfer within the MHC system.* Sadly, the choice of a MHC provider is often random (e.g., the first one to return a call), or based on convenience or insurance restrictions. Simply stated, the MHC provider influences treatment outcomes and stakeholders *lack systematic access to valid and actionable information to optimize effective patient-provider matches*. Without systematically collecting and disseminating performance Report Cards, stakeholders (e.g., patients, therapists, administrators responsible for case assignment, primary care physicians) *lack vital information on which to base MHC choices and referral decisions, and that can inform personalized treatment*<sup>27</sup>. Conversely, there is potentially immense advantage to matching patients to providers based on scientific outcome data<sup>28</sup>. Consistent with this notion, the Institute of Medicine (IOM)<sup>1</sup> has made recommendations to: (a) customize care based on the patient's needs, (b) share knowledge, (c) engage in data-driven decision-making, (d) promote transparency (*including information on performance and patient satisfaction*<sup>29</sup>), and (e) use valid and reliable assessment instruments to assess progress and to aid decision-making. The IOM has also recommended that MHC systems and patients be informed of the demonstrated effectiveness of different treatment options, and that *patients be provided with information on the quality of*

70 *practitioner care and use this information when making treatment decisions.* In essence, the IOM strongly  
 71 recommends routine assessment and the dissemination of provider Report Cards. Importantly, we have survey data  
 72 that point to MHC patients, therapists, and administrators endorsing such applied knowledge transfer as a high  
 73 priority<sup>27</sup>. Provider track record Report Cards are meaningful data to the MHC patient population, as are the mental  
 74 health benefits that could stem from being well matched to provider.

75 We have developed over the past 20 years an innovative, technology-based mechanism/intervention<sup>17</sup> to deliver  
 76 Report Cards and drive this match concept within a patient-centered MHC model. Our longitudinal data suggest that  
 77 our match algorithm, based on our multidimensional outcome tool (the Treatment Outcome Package<sup>30</sup> [TOP]  
 78 described below), is efficacious for MHC outcomes. In addition to our study highlighted above<sup>17</sup>, a more recent  
 79 prospective study of 59 therapists and 3,540 patients resulted in a between-treatment controlled Cohen's *d* effect size  
 80 of .80<sup>26</sup>. Each therapist's first 30 patients were used to classify a therapist's skills in twelve domains of symptoms  
 81 and functioning as either statistically above average, average, or below average. The best matching algorithm  
 82 functioned as follows: for each new, successive patient, he or she was classified as well-matched if the risk of harm  
 83 was eliminated (i.e., the therapist was not below average when treating any elevated domain) and the therapist was  
 84 above average in treating the patient's three most out-of-the-norm domains (e.g., depression, suicidality, and panic).  
 85 *Poorly matched patients had below average outcomes, with small effect sizes ( $d = .30$ ). Well-matched patients, by*  
 86 *contrast, achieved very large pre- vs. post-treatment effect sizes of  $d = 1.19$ .* These data lend strong support that the  
 87 proposed comparative effective research (CER) will yield similar results (i.e., increased efficacy and reduced harm)  
 88 in re-aligning the skills of a large population of therapists at our partner site (Psychological and Behavioral Health  
 89 Consultants; PBC) when matching empirically-derived therapist skills with patient need. The  
 90 technology/intervention is well established, it has demonstrated efficacy, and awaits investigation in a well-powered  
 91 randomized controlled trial (RCT).

92 CER designs in this area are lacking<sup>31</sup>. For example, in a recent Cochrane Review of studies investigating the  
 93 effects of publicly disseminating surgeons' performance data on patients' treatment decisions and service  
 94 utilization<sup>32</sup>, no studies were deemed to be of sufficient quality to meet inclusion criteria (i.e., RCTs, quasi-RCTs, or  
 95 controlled pre-post studies). The authors concluded that *future research on the provision of provider performance*  
 96 *data should include CER designs involving multiple stakeholders.* In a second Cochrane Review of studies involving  
 97 the public release of provider outcomes<sup>31</sup>, only 4 were deemed methodologically suitable (i.e., RCT, quasi-RCT,  
 98 interrupted time series, or controlled pre-post design). Public dissemination of provider performance data was linked  
 99 to small improvements in acute myocardial infarction mortality rates<sup>33</sup>, and increased organization quality  
 100 improvement activity<sup>34</sup>. *None of the identified studies (or any of the studies cited but excluded) involved MHC*  
 101 *treatment.* Furthermore, these studies involved passive dissemination of provider outcome information to large  
 102 numbers of patients in selected health plans. Theoretically, access to such provider Report Cards can encourage  
 103 patients to compare individual providers and preferentially choose the best performing treatment provider. However,  
 104 passive dissemination ignores the complexity of performance data and the necessary involvement of multiple key  
 105 stakeholders *across the MHC system* (e.g., providers, administrators, PCPs, and other referrers<sup>35</sup>). Passive  
 106 dissemination of Report Cards (in the absence of an identified patient's needs or communication with providers or  
 107 administrators who manage referrals and case assignments) is likely to be confusing and overwhelming to patients<sup>36</sup>  
 108 <sup>37</sup>. *What is needed is a coordinated system of using provider outcomes data to optimize patient-provider matches in*  
 109 *the service of rendering patient-centered outcomes more effective, efficient, and safe in an easy-to-use, when-I-need-*  
 110 *it data access model.*

111 To address the limitations of existing research, including the glaring lack of attention to MHC and patient-  
 112 centeredness, we are engaging in a collaborative research project with the stakeholder groups referenced above. For  
 113 this CER, we have been working in close partnership with PBC. Dr. Kraus, Co-PI on this project, has a well-  
 114 established and long-standing partnership with PBC, which has contracted with Outcome Referrals, Inc. [ORI] to  
 115 process outcome data on all patients as part of routine care (Donald K. Sykes, Jr., Managing Director at PBC, is also  
 116 a Co-PI on this project). In preparation for the proposed research, we collected preliminary data to explore  
 117 stakeholders' (patients, psychotherapists, and MHC administrators) attitudes toward patient-focused, data-driven  
 118 MHC decision-making<sup>27</sup>. Specifically, in collaboration with several partnering community mental health centers in  
 119 Massachusetts (MA), we surveyed adult outpatients (age 18-65 years;  $N=17$ ), psychotherapists ( $N=20$ ), and  
 120 administrators ( $N=8$ ) to assess perceived need for change in treatment decision-making determinants and overall  
 121 interest in using a scientific match algorithm. All participants were recruited voluntarily and completed parallel  
 122 versions of a web-based survey over an 8-week period. Patient survey items were primarily aimed at assessing  
 123 attitudes and beliefs about differential therapist effectiveness and the role of Report Cards in provider selection.  
 124 Therapist survey items were primarily aimed at assessing attitudes and beliefs about differential therapist  
 125 effectiveness, performance measurement, and the role of Report Cards in provider selection. Administrator survey

126 items were primarily aimed at assessing attitudes and beliefs related to differential therapist effectiveness, Report  
 127 Cards, and the use of Report Cards to inform treatment decisions, such as case assignments. The Internal Review  
 128 Board (IRB) at the University of Massachusetts (UMass) approved this study.

129 Results for patient stakeholders ( $M$  age = 40.7 years; majority female [76.9%], White [69.2%], income below  
 130 \$25K [61.5%]) showed that each had seen an average of 7 different therapists in their lifetime; 83% reported having  
 131 trouble figuring out which therapist could best help them; 67% reported that they would use information about  
 132 therapists' track records in helping people with issues similar to their own if they could access it; 75% would want  
 133 to be assured that a referring clinician (e.g., a PCP) was informed of therapists' track records and used this  
 134 information to make a referral determination; 100% indicated that it would be important for them to be assigned to a  
 135 therapist based on that therapist's track record of helping people like them (suggesting that even if patients do not  
 136 directly access Report Cards themselves, they ultimately want to be assured that they are being well matched to  
 137 their therapist). For participating therapists ( $M$  age = 37.8 years;  $M$  experience = 6.10 years; majority female  
 138 [86.4%], White [90.9%]), 53% agreed that therapists should specialize in areas where they achieve good outcomes,  
 139 rather than acting as generalists; 89% would participate in a service that referred them patients who have problems  
 140 that they have been successful in treating; 100% indicated that it would be important for them to be referred or  
 141 assigned cases that were particularly well matched to their strengths. For participating administrators ( $M$  age = 43.0  
 142 years; majority female [87.5%], White [87.5%]), 100% reported that if they had access to data on their therapists'  
 143 track records, they would use it to determine case assignment; 100% indicated that it would be important for them to  
 144 refer or assign cases that were well-matched to a therapist's strengths; 100% agreed that it is their ethical  
 145 responsibility to collect and use information that could substantially reduce the chances of a patient being harmed by  
 146 treatment.

147 These results are consistent with the literature (above) and support this stakeholder-centered proposal.  
 148 Variability in provider-level outcomes is indisputable. Prominent health care systems have placed performance  
 149 measurement at the center of core initiatives. Despite this rhetoric, results from multiple Cochrane Reviews  
 150 highlight crucial knowledge gaps in this area. Based on its own analysis of important evidence gaps, PCORI has  
 151 called for an increase in "precision" or "personalized" treatment, with a focus on tailoring<sup>38</sup>. Previous research,  
 152 including our own, has empirically demonstrated substantial differences in projected treatment effect sizes  
 153 depending on to which therapist a patient is referred. Heeding the call from the Cochrane Reviews and IOM, we will  
 154 test in a RCT, the comparative effectiveness of an innovative, scientifically based patient-therapist match algorithm  
 155 with proven efficacy and compare it to the commonplace pragmatic referral matching (based on provider  
 156 availability, convenience, or self-reported specialty). Psychosocial treatment itself, across both conditions, will  
 157 remain naturalistically administered by varied providers (e.g., psychologists, social workers) to patients with  
 158 complex mental health concerns within another of our partner clinical networks, PBC – one of the largest providers  
 159 of outpatient mental healthcare services in Ohio. Given the general efficacy of psychosocial treatment<sup>39</sup>, both  
 160 treatment groups are grounded not only in evidence-based practice, but also a realistic MHC treatment choice that  
 161 patients face. The comparators are the defined strategy of match-algorithm referral/case assignment vs. pragmatic  
 162 referral/case assignment. The results of this trial will provide practical information that can assist patients and other  
 163 stakeholders to make evidence-informed decisions about their MHC and health outcomes.  
 164

## 165 B. Significance

166 Patients rarely have access to information that would help them select the personally best available provider  
 167 (i.e., Report Cards). Although routine patient-reported outcomes data are the lynchpin of so-called "patient-focused  
 168 research," the utilization of these data to inform treatment decision-making has been unsystematic and non-patient-  
 169 centered. This trial will be the first of its kind – in any area of healthcare – to use performance data to match  
 170 specific patients with a short list of empirically well-matched providers. The goal is to provide choice while  
 171 minimizing or eliminating the risk of harm. MHC has been virtually absent in discussions regarding the  
 172 communication and dissemination of performance data to guide optimal patient-provider matching. Given its nature  
 173 and history (e.g., stigma, misinformation, lack of parity with other health problems), perhaps more so than any other  
 174 health care category, quality MHC decision-making is complex<sup>1</sup>. To account for this complexity, patients and other  
 175 key stakeholders (primary care, administrators, and therapists) need to contribute to the development and testing of  
 176 novel strategies. This includes research design, which is why we have engaged an Advisory Board that includes all  
 177 of the relevant stakeholders in the implementation of our preliminary studies and development of the current  
 178 proposal to test the comparative effectiveness of our scientific-match algorithm. In doing so, we hope to avoid the  
 179 pitfalls of previous research that has failed to engage relevant stakeholders and has, instead, assumed passive  
 180 dissemination was an adequate method for making Report Cards accessible and useful. Stakeholder involvement

181 increases the odds of identifying mutually beneficial, feasible, replicable, and sustainable strategies for making  
 182 provider performance Report Cards relevant and useful.

183 Information and having options are critical to improving MHC. Providers vary significantly in their  
 184 effectiveness. Even when patients are in the rare position of having complete control over selecting their provider,  
 185 the choice represents a “roll of the dice” when it comes to the likelihood of benefit. Convincing evidence  
 186 demonstrating the differential effectiveness among MHC providers<sup>40</sup> indicates that matching patients to providers  
 187 with actuarially derived strengths in the individual patient’s problem area(s) will lead to better outcomes<sup>24</sup>. Because  
 188 the proposed matching is specifically geared toward a *patient’s identified difficulties*, the matching process and  
 189 subsequent outcomes will be of direct relevance to each individual patient. Results from systematic reviews and the  
 190 recommendations of the IOM<sup>1</sup> highlight (a) the importance of providing patients with comparative information on  
 191 the quality of care provided by practitioners and the use of this information when making treatment decisions and  
 192 (b) the inadequacy of previous research designs and early approaches to achieving (a). Stakeholders have  
 193 highlighted the importance of improving communication, dissemination, and resources for decision-making (see our  
 194 preliminary study results, as well as<sup>36,37</sup>). What has been lacking, however, is an effort to bring together relevant  
 195 stakeholder groups to examine systematically how to achieve these improvements in MHC. The proposed research  
 196 is thus novel in its aim to bring together these stakeholders, and in its level of directiveness and patient-centeredness.  
 197 Previous research involving the dissemination of Report Cards (none of which has been conducted in MHC) has  
 198 involved the passive dissemination of performance data to large groups of patients, regardless of whether or not  
 199 these data were relevant to an individual patient’s needs at the time. The proposed research will use information that  
 200 is specifically relevant to each individual patient to inform the assignment/referral of *this patient to one of a short*  
 201 *list of scientifically well-matched psychotherapists at a crucial juncture in the care decision-making process*.

202 In addition, the application of an empirically derived match system to inform case assignment and patient  
 203 decision-making would yield substantial health benefits with limited burden. Complementary approaches to  
 204 improving MHC have largely focused on the dissemination and implementation of lab-tested multicomponent  
 205 psychological treatments. This EST approach on its own is limited because: (a) this research uses aggregated data  
 206 that masks response variability between patients, and (b) training therapists to apply a complicated intervention to a  
 207 criterion level of adherence and competence is extremely costly, time consuming, and often continues to disregard  
 208 variability between patients<sup>22</sup>. Furthermore, differences between individual treatment providers consistently explain  
 209 more outcome variance than the specific interventions employed. *The evidence, therefore, suggests that we will have*  
 210 *a greater likelihood of improving outcomes if patients and stakeholders have information that can help match*  
 211 *patients to the most personally appropriate treatment provider* than if we randomly select a provider who employs a  
 212 complex, lab-vetted treatment protocol<sup>24</sup>. Currently, with rather random therapist assignment, the chances of being  
 213 harmed are not trivial. Our study<sup>17</sup> demonstrated that for any given problem area (e.g., depression, psychosis), about  
 214 50% of therapists are highly competent in treating the problem, 36% are ineffective, and 14% are harmful. With the  
 215 average patient having more than 3 problem areas needing treatment<sup>40</sup>, and assuming random case assignment, 52%  
 216 of therapies are ineffective, 34% harmful, and 14% effective. The problem is that a provider need only be harmful in  
 217 1 domain to cause harm, yet needs to be effective in all patient-relevant domains to deliver maximum treatment  
 218 benefit. Our prospective study has demonstrated that we can triple the effect size of standard, real-world outcomes  
 219 with a patient-centered matching algorithm. Thus, the logical next step, which is the crux of this proposal, is to test  
 220 our match algorithm in a fully powered RCT.

221 A significant part of the match benefit is eliminating the risk of harm. Treatment failures result in significant  
 222 direct and indirect costs to patients, families, and society. Research indicates that had these deteriorating patients  
 223 been referred to or been given the option of selecting a therapist who has demonstrated consistent effectiveness in  
 224 the relevant problem domain(s), their increased likelihood of experiencing a benefit would represent a large effect  
 225 size. This is a sizable benefit that, practically speaking, mainly involves the collection and dissemination of routine  
 226 outcomes data. Although routine assessment has become more common<sup>41</sup>, the implications of this information for  
 227 higher quality MHC have yet to be fully examined or realized. Research has shown that outcome data from as few as  
 228 5 different patients are needed to reliably estimate the effectiveness of a given treatment provider<sup>42</sup>. Our recent study  
 229 demonstrates that predicting future success of therapists becomes remarkably stable after 20 cases. *Thus, the*  
 230 *potential scalability of this patient-centered decision-making strategy is extremely high*.

231 This research is patient-centered at every stage. Because the proposed scientific-matching system identifies  
 232 providers who have demonstrated effectiveness (by *patient-reported outcomes*) in the specific problem domain(s) of  
 233 concern *to the identified patient*, the focus of the intervention is optimally patient-centered. Furthermore, the  
 234 multidimensional outcome measure of interest (TOP) has been developed and refined based on “real world” patient-  
 235 feedback over the past 25 years. It is a measure that has been jointly created by patients. It is also important to note  
 236 that rather than prescribing a single “best-match,” the matching output will generate a short list of well-matched

237 therapists participating at PBC. This will allow support staff to make case assignments to this short list with typical  
 238 operating procedures (i.e., still allowing for pragmatics like availability). This not only limits burden on the staff,  
 239 therapists, and patients, but it also maintains methodological rigor (via the double-blind) and underscores how the  
 240 match algorithm, if found effective in this trial, can be readily incorporated into MHC systems in a way that  
 241 maximizes impact, but minimizes disruption of patient flow and systemic operations.

242 The spirit of routine outcome assessment is to improve treatment quality for individual patients<sup>43</sup>. The extant  
 243 literature and our own research has shown that patients and their caregivers are frustrated with their current level of  
 244 involvement and access to information that could lead to better informed MHC decisions<sup>44</sup>. We have assembled an  
 245 Advisory Board consisting of the following members who represent the voices of key stakeholder groups: three  
 246 patient partners who have experience receiving mental health services, two practicing psychotherapists (one a PhD  
 247 psychologist in Cleveland, and one a LICSW in Boston), the Executive Director for the National Alliance on Mental  
 248 Illness Greater Cleveland, and a psychiatrist and researcher at the VA's Center for Healthcare Organization and  
 249 Implementation Research in Boston. As detailed in the Engagement Plan below, our Advisory Board stakeholders  
 250 have been centrally involved in the development and modification of this research proposal.

## 251

### 252 C. Study Design or Approach

#### 253 Specific Aims

254 The proposed study will compare the effectiveness of naturalistic individual MHC either with or without the  
 255 scientific match algorithm with an *individual level RCT*. The details of the design are provided below, though  
 256 finalization of the study protocol will occur in tandem with the Advisory Board and will be presented to PCORI as a  
 257 year-one deliverable. Consenting adults referred for MHC presenting to our partner PBC clinics will be randomly  
 258 assigned, by an intake specialist, to naturalistic treatment (in accordance with the PBC care model) with either a  
 259 scientifically matched provider (experimental group) or to a pragmatically matched provider (control group) (*this*  
 260 *randomized CER design meets PCORI's standards for causal inference methods*). To inform the match condition,  
 261 we will first conduct a naturalistic baseline assessment of PBC therapists' performance (across a minimum of 15  
 262 cases) to determine their strengths in treating 12 behavioral health domains measured by the primary outcome  
 263 measure on which the match algorithm is based: the TOP<sup>30</sup>. (The TOP is already administered routinely in our  
 264 partner network; thus, we can leverage existing resources within this practice-based research network to support this  
 265 study with little to no extra burden on administrators, providers, and patients.) Wampold and Brown<sup>43</sup> determined  
 266 that therapists' skills can be reliably determined with as few as 5 cases, and our previous study demonstrated the  
 267 predictive validity of therapists' strengths is maximized with 20<sup>26</sup>. Being assigned at least 15 new cases in a  
 268 naturalistic baseline period is readily achievable for most full-time therapists. Thus, the empirical foundation of the  
 269 match algorithm can be readily adoptable in systems of various sizes.

270 Following the naturalistic baseline period, new patients will be randomly assigned to the match versus no match  
 271 condition, remaining unaware of their assignment. Patients in the match condition will be assigned to therapists who  
 272 have a demonstrated strength (derived from the baseline period) in treating, at a minimum, the patient's highest self-  
 273 reported distress domain on the TOP. Therapists will also be unaware of their patient's treatment condition (double  
 274 blind), and they will treat both matched and non-matched patients (i.e., they will be crossed over the two conditions  
 275 to minimize administrative disruptions). Patients will be assessed at baseline and at regular intervals during  
 276 treatment. For the sake of the trial, treatment outcome will be considered the actual point at which treatment  
 277 terminates if under 16 weeks, or at week 16 for those being treated longer term.

278 Based on initial feedback from Advisory Board members (responding to the query of what outcomes are of  
 279 most importance to stakeholders), trial assessment will include risk-adjusted TOP scores throughout treatment, self-  
 280 rated global symptomatology and functioning, therapeutic alliance quality, patient outcome expectations, treatment  
 281 dropout, and patient satisfaction. *We predict that the scientific match group will outperform the no match group to a*  
 282 *clinically significant degree on TOP outcomes and global symptomatology. We also expect that the match group will*  
 283 *be more effective in promoting alliance quality and facilitating positive patient outcome expectations, both of which*  
 284 *are established correlates (and candidate mechanisms) of positive treatment outcomes<sup>45,46</sup>. Finally, we expect there*  
 285 *to be less unilateral patient dropout in the match condition, and higher patient satisfaction (these questions meet*  
 286 *PCORI's standards for formulating research questions).*

287 Secondly, we will examine 4 potential moderators of the expected between-group treatment effects on the  
 288 primary TOP outcomes (i.e., heterogeneity of treatment effect; *HTE, as per PCORI standards*): (a) patient race (as it  
 289 may be that the match algorithm is particularly potent, and an important responsiveness tool, for historically  
 290 understudied or underrepresented patients), (b) degree of match of therapist strengths to patient problems (rated  
 291 dimensionally as a ratio given that therapists can be matched on more than just the minimum 1 domain, and the  
 292 elimination of harmful matches for any distressed domain reported by the patient), (c) patient distress severity, and

293 (d) complexity of patient presenting problem. Thus, we will test if matching is only, or particularly, effective under  
 294 the conditions of a central patient characteristic, a multiple domain match, and/or for patients with the most severe  
 295 or complex pathology. Also, the TOP collects medication information, including type and dose. Thus, we will be  
 296 able to assess and monitor medication use, which is also integrated into the risk-adjusted TOP scoring. Moreover, in  
 297 assessing for medication use, we can also explore it as a correlate of outcomes and, if significant, include it as a  
 298 covariate in our primary statistical models. The TOP also tracks whether the referral and treatment is voluntary, and  
 299 we can explore the impact of this variable as a possible moderator of the treatment condition-outcome association if  
 300 there is enough variability (i.e., enough people who self-report as being an involuntary participant for one reason or  
 301 another).

302 We will also assess therapists' self-perceived strengths on the TOP domains. We expect to replicate previous  
 303 literature showing that therapists are poor judges of their own efficacy, tending to underestimate negative effects and  
 304 overestimate positive effects with their patients<sup>47</sup>, which would further underscore the importance of a data-driven  
 305 match process. Finally, we will conduct exit interviews, and corresponding qualitative analyses, with a subsample of  
 306 participating stakeholders to gather input on how to be maximally responsive to the study findings in terms of  
 307 dissemination, implementation, and policy-making. Our Advisory Board members will play a central role in  
 308 collecting these data and incorporating them into post-trial action plans (*as our Advisory Board includes MHC*  
 309 *patients, this element of our design addresses PCORI's standards associated with patient-centeredness, as does the*  
 310 *very nature of our experimental manipulation*).

### 311 312 **Research Method**

313 **Patients.** Participants will be adult men and women (age 18-70) in PBC's referral stream (largely Cleveland  
 314 clinic and primary care [PCP] practice). Recruitment to the study simply means a willingness to be randomized to  
 315 condition and to complete supplemental assessments (for monetary compensation) at baseline, at regular intervals  
 316 during treatment, and at the trial's definition of posttreatment. As this is an effectiveness design with a premium on  
 317 ecological validity and scalability, virtually all patients in the PBC network will be eligible. It is most likely that the  
 318 sample will be predominated by the following problem domains: depression, panic, substance abuse, suicidality, and  
 319 poor quality of life. The only study-related, patient-level exclusion criterion will be patients who are not the primary,  
 320 informed decision-maker for their care. Thus, patients will present with a multitude of presenting problems across a  
 321 spectrum of *Diagnostic and Statistical Manual of Mental Disorders* (5th ed.; *DSM-5*<sup>48</sup>) diagnoses (including high  
 322 severity, chronicity, and comorbidity rates typical at PBC). The composition of our sample will roughly match the  
 323 average utilization data for age, gender, and race/ethnicity at PBC (see Section E, "Patient Population," for  
 324 additional detailed information on the patient sample, including the targeted/planned enrollment table based on our  
 325 PBC utilization projections and our power analysis below). With this composition, we can analyze HTE on race as  
 326 one of our patient-level moderators.

327 **Statistical power analysis and attrition.** For the primary 3-level hierarchical model assessing treatment  
 328 condition effects at the patient level on linear change rates within patients, we used Raudenbush and Liu's<sup>49</sup> formula  
 329 as incorporated in the Optimal Design program to determine the minimum numbers of therapists and patients needed  
 330 to detect a moderate effect of condition (standardized difference between change rates = .50). With repeated  
 331 measurements spaced over the maximum 16 treatment weeks and assuming 5 patients per therapist, an intra-class  
 332 correlation of .15, and an alpha of .05, we will need a total of 44 therapists and 211 patients to achieve a power of  
 333 .80 to detect moderate condition effects on linear change rates. Factoring a conservative 25% dropout rate at the  
 334 patient level, running our experiment on a minimum of 281 patients (6-7 per therapist) should provide sufficient  
 335 statistical power to detect group differences on our primary outcome variables.

336 We will also analyze the secondary outcome of domain-specific TOP scores; that is, TOP change as a function  
 337 of condition on the most elevated presenting domain (which for patients in the match condition would be the domain  
 338 on which they were matched to their provider). To maintain power, and to maintain the appropriate multilevel data  
 339 structure, we will run the same hierarchical linear models as above (powered to the same degree) with the outcome  
 340 being each person's standardized score on their most elevated TOP domain.

341 **Patient recruitment and informed consent.** Patients will flow into PBC via primary care referrals, hospital  
 342 discharge referrals, internal office (PBC) referrals, or self-referrals. To increase potential patients' awareness of our  
 343 study, which may in turn increase their willingness to enroll vs. view it as an unexpected inconvenience, PBS will  
 344 liaise with community physicians and hospital discharge staff. Specifically, these referrers will be asked to mention  
 345 the study to their referees according to the following script that we will provide:

346  
347 *"Are you struggling with mental health concerns and looking for a therapist?"*  
348



349 *Contact Psychological and Behavioral Consultants (PsychBC) to speak with one of our specialists about setting*  
 350 *up an appointment, and consider participating in a research study aimed at matching patients to good-fitting*  
 351 *therapists.*

352  
 353 *To participate, you need to be 18 years of age or older, and seeking therapy at a participating PsychBC*  
 354 *location: Avon, Beachwood, Brecksville, North Olmstead, or Willoughby.*

355  
 356 *Far too many patients struggle to find the right therapist. Information from this study will help us make better*  
 357 *decisions about who is the best fitting therapist for your needs. Participation simply involves completing some*  
 358 *online questionnaires before the start of your therapy and on a few occasions during your therapy. That's it!*  
 359

360 *Participants will receive up to \$150 for their participation.*

361  
 362 *To hear more about the study and/or to set up an appointment with a study therapist, please contact Felicia*  
 363 *Romano at 844-468-5050.*

364  
 365 *Take care,*  
 366 *PsychBC and Collaborators”*

367  
 368 As an additional measure to increase patient recruitment, PBC will announce the study on its website's banner in  
 369 close proximity to the intake telephone number. It will simply read: “*If you are interested in participating in a*  
 370 *research project with compensation, ask about the [Match Project](#).”*  
 371

372 In whatever way they are referred, patients first call the PBC intake line. At this initial contact, PBC intake  
 373 specialists (for which there are typically five working at any given time), screen the patient for basic study eligibility  
 374 – i.e., is an adult (age 18 to 70) who (a) will make their own treatment decisions, (b) will receive outpatient therapy  
 375 from a PBC provider, and (c) can access their email immediately. If the caller is not eligible, the intake specialist  
 376 completes the intake call as usual, with no mention of the study script. If the caller meets basic eligibility criteria, the  
 377 intake specialist presents the following study script:

378  
 379 *“Here at PsychBC, we prioritize a personalized care experience for our new clients. We do this by having you*  
 380 *complete a few brief forms online, starting with today's intake. These standard forms ask questions about you*  
 381 *and your well-being. Answering a few questions today can help us assign you to a personally best-matched*  
 382 *therapist for your needs. During treatment, your responses provide you and your therapist valuable feedback on*  
 383 *your progress. Many clients do this and find it very useful.*

384  
 385 *Also, because this is part of an ongoing project here at PsychBC, I can pay you \$15 for your time to review the*  
 386 *materials. If you opt into completing the forms regularly, you can earn more money. Do you have any*  
 387 *questions?*

388  
 389 *[after addressing any questions] Okay, so I can email you the link to the materials now. We can also schedule*  
 390 *an immediate call back so that I can assign you to a therapist today. Again, who that is can be personalized to*  
 391 *you based on your responses to the form.”*

392  
 393 The intake specialist will then ask patients for permission to send, via email, a study consent form and baseline  
 394 measures packet if they are interested in learning more about participation. If given verbal authorization to do so, the  
 395 PBC intake specialist will push the study link immediately. As part of the online consent document, patients are  
 396 informed that their participation in the trial will largely mimic the same treatment that they would receive if they  
 397 were not participating. However, to be enrolled, the patient must consent to be randomized, complete extra study-  
 398 specific measures (before, during, and after treatment), and accept assignment to an eligible treatment format as per  
 399 below. Patients will also be asked to remain with the same therapist through at least 16 weeks of treatment. If a  
 400 patient does not consent via the online form, their second call with the intake specialist will proceed as usual. If a  
 401 patient consents to be enrolled, they have signed the consent form and completed a baseline survey of measures  
 402 (including the TOP) through the online platform. Patients will then be randomized to condition and assigned to a  
 403 provider based on the experimental parameters of that condition (i.e., scientific match vs. pragmatic match) on their  
 404 second call with the intake specialist. From there, treatment proceeds as usual, with the project coordinator sending



405 weekly measures to study patients via email for the duration of their treatment, or the 16-week outer limit for those  
 406 in longer-term treatment. All patients who consent are sent a hand-written “thank you” note from the research  
 407 team within 1 week of enrolling. Regardless of consent status, the project coordinator sends (within 1 week) a \$15  
 408 Amazon eGift card to all patients who view the consent form. This compensation incentivizes patients’ willingness  
 409 to leave the initial intake call to review the study consent form.

410 We do not anticipate problems meeting our recruitment numbers in the project time frame. As one of the largest  
 411 Ohio providers of outpatient behavioral health care, PBC employs over 80 therapists. Moreover, their care model  
 412 already uses the TOP for routine outcome monitoring, and they are willing to use a patient-level-best-matched  
 413 clinician list that is generated in real time (based on the predictive validity of our match algorithm). Including this  
 414 randomization control into the treatment delivery model will not create any systemic barriers. PBC schedules  
 415 approximately 950 new patients per month. Recruitment will be coordinated among our project coordinator, PBC  
 416 intake staff and dedicated research assistant, and PBC administrators, and will involve presenting information about  
 417 the study as per the protocol outlined above. Moreover, PBC will offer periodic incentives (in the form of a payment  
 418 bonus or tickets to local events) to the intake specialist who successfully directs the most patients to our online study  
 419 consent form in a given period of time (e.g., a 1-week or 1-month competition). Note that this bonus is completely  
 420 unrelated to PBC’s project budget; this is simply a motivational strategy within their own payroll system.

421 Again, patients will be ensured that their participation in the trial will largely mimic the same treatment at the  
 422 PBC site that they would receive if they were not participating. All patients will be told that the study is examining  
 423 various referral processes that will not influence their treatment. They will be kept unaware of the *specific* nature of  
 424 the referral manipulation, but will be told that it may help connect them with a well-match provider. Patients will  
 425 also be informed that they will be fully debriefed following the study and offered an opportunity to provide feedback  
 426 on their experience. Patients will be asked to remain with the same therapist through the end of their treatment or at  
 427 least 16 weeks of treatment (our maximum end point for the trial); however, if they request a transfer earlier, this  
 428 will be treated as the termination point for that course of treatment with the study provider (to avoid a multi-provider  
 429 confound, with the latter provider not having been part of the match process). Patients will also be informed that  
 430 they will complete all assessments that are part of their standard clinical care within PBC, as well as several study-  
 431 specific measures. For completing the additional measures, each patient will be compensated \$50 total.

432 **Therapist recruitment, informed consent, and characteristics.** Therapists will be employed at PBC, and will  
 433 include psychologists, clinical counselors, and social workers. At the trial’s outset, a total of 58 adult therapists will  
 434 be eligible to participate and be screened. The goal N is 44 providers to ensure sufficient power. We anticipate that  
 435 at least 90% (52 therapists) will agree to participate in this research, as the procedures largely mimic their typical  
 436 practice, as well as the culture of routine outcome measurement at PBC. Recruitment will be coordinated among our  
 437 project coordinator, PBC site staff members, and PBC administrators, and will involve presenting information about  
 438 the study to providers through telephone or email. Interested participants will meet or speak via teleconference with  
 439 the project coordinator to learn about the study details/procedures and to provide consent through an online baseline  
 440 survey to which they will be directed. Therapists will be told that the study is examining various referral processes  
 441 that will not affect their delivery of treatment-as-usual. They will be blind to the specific nature of the referral  
 442 manipulation, but will be told that they will be fully debriefed following the study and offered an opportunity to  
 443 provide feedback on their experience. Interested providers will need to agree to keep sufficient openings on their  
 444 case roster until they meet their required case numbers (this will not be an issue for PBC providers). They will also  
 445 be informed that their study patients will complete a few study-specific measures throughout and after treatment.  
 446 Consenting therapists will complete a brief, one-time survey that will assess demographic information, clinical  
 447 experience, practice information, and perceptions of typical therapeutic actions and outcomes. This single-  
 448 administration survey will take no longer than 25 minutes to complete, and therapists will be compensated with \$20.  
 449 Therapists will also need to agree to complete a few study-specific, during-treatment measures (with their study-  
 450 enrolled patients) for which they will be compensated \$50 per patient for this additional, but minimal, time burden.  
 451 Non-consenting therapists will receive case assignments as per usual protocol and will simply not be included in the  
 452 trial (we will analyze consenting and non-consenting therapists on demographic differences to see if any systematic  
 453 sample bias exists). Reflecting PBC psychotherapist demographics, we anticipate that our sample will roughly  
 454 breakdown as follows: clinicians will be social workers, psychologists, and licensed clinical counselors.  
 455 Approximately 70% of therapists will be female; 88% will be white/non-Hispanic; 3% Black; 2% Hispanic; 2%  
 456 “Other/mixed”; and 5% Asian. age *range* = 30-65 years Based on these projections and our power analysis, we have  
 457 included a targeted/planned therapist enrollment Table in Appendix A.

458 It should also be noted that as the study proceeds, additional therapists at PBC will become eligible for the study  
 459 by virtue of having 15 completed cases for which TOP data can be used to generate Report Cards. As of 8/22/18,  
 460 there are 28 of these clinicians. We will engage a second wave of therapist recruit if it helps (a) mitigate any

461 therapist attrition from wave 1, and/or (2) facilitate patient recruitment. Regarding the latter, it is possible that  
 462 participating therapists from wave 1 will have a full caseload at a time when their name comes up in a match. In this  
 463 case, having more therapists in the match pool could allow an intake specialist to assign the patient to the next  
 464 therapist in the well-matched list who *does* have an opening. As another example, it is possible that patients will be  
 465 willing to be in the study, but only if they can see a therapist at a particular location. Again, if we increase our pool  
 466 of therapists, we might increase our ability to match at a particular study site with a clinician who has an opening.  
 467 Or, if enough wave 2 clinicians enroll in a given area, we *might* be able to add a site to our current list of six active  
 468 PBC sites.

469 **Randomization protocol.** *Individual treatment referral is the point of entry into the present study (i.e., the*  
 470 *randomization occasion).* Consecutive consenting patients will be randomly assigned to condition. The project  
 471 coordinator, unaware of therapist baseline performance, will generate the randomization sequences using an online  
 472 random generator. Therapists will be crossed—that is, some of their cases will be matched, while others will be non-  
 473 matched. Within condition, patients will be assigned sequentially to therapists until therapists reach their study  
 474 quota. In the low probability event that there is no therapist meeting minimal match criteria for a patient in the match  
 475 condition, that patient will be removed from the study protocol (though will, of course, still receive treatment) and  
 476 replaced with the next patient where a match does exist (this will also be carefully tracked).

477 **Treatment.** For the sake of standardizing outcome assessment in the trial, patients' data will be tracked for 16  
 478 weeks following the start of therapy. Treatment outcome will be considered the point of mutual termination or 16  
 479 weeks, whichever comes later. With this naturalistic design, mutual termination for some patients will occur in  
 480 response to outcome data-informed clinically significant improvement. Some treatments will be longer-term, and we  
 481 will consider week 16 the endpoint for assessing acute response in the present trial. Thus, our primary outcome  
 482 variable will be rate of improvement over a maximum of 16 weeks. We selected 16 weeks for several reasons. First,  
 483 16 weeks, or roughly 16 weekly sessions, is a common treatment dose in clinical trials. Second, the psychotherapy  
 484 dose-response literature has shown that treatment response is best modeled by a negatively accelerating relation to  
 485 number of sessions<sup>43</sup> where each subsequent therapy session evidences, on average, less change than the previous  
 486 session<sup>51</sup>. Third, of those patients who evidenced improvement in a large naturalistic sample, 80% met criteria for  
 487 reliable change by session 15<sup>52</sup>. Thus, given the relatively short-term nature of treatment in managed care, as well as  
 488 the empirical evidence that most psychotherapy change takes place in the early sessions, we will set our trial  
 489 treatment outcome to a maximum of 16 weeks (*yet will also track a random subset of patients through 1 year*).

490 **Patient demographic characteristic assessment.** Patient demographics will be assessed with the *TOP-*  
 491 *Consumer Registration Form* (TOP-CR; see Appendix B), which is part of the TOP suite of self-report measures  
 492 used routinely in our partner PBC system. On this form, patients indicate their age, gender, ethnicity, marital status,  
 493 income level, employment status, religious identification, education level, general health status, and medical and  
 494 mental health treatment history.

495 **Therapist characteristic and self-efficacy assessment.** PBC providers will complete a study-specific *Provider*  
 496 *Characteristics Form* (PCF) to assess demographic information, clinical experience, degree type, percent time  
 497 seeing various patient types/diagnoses, any specialty training they have received, and dimensional ratings of the  
 498 influence of various theoretical orientations on their treatment approach. Providers will also complete a study-  
 499 specific *Therapist-Perceived Strengths* (TPS) measure to assess their beliefs about their effectiveness in treating the  
 500 various TOP domains when uninformed of their data-driven TOP track record.

501 **Treatment outcome evaluation and the match algorithm.** The TOP suite of measures will provide our  
 502 primary outcome measures<sup>30</sup>, which are administered routinely at PBC. The TOP, which was developed and revised  
 503 over the past 25 years with extensive input and feedback from consumers, is a behavioral health assessment and  
 504 outcome battery designed for clinical and research purposes in naturalistic settings. The TOP evaluates behavioral  
 505 health symptoms, functioning, and case mix variables (e.g., divorce, job loss, comorbidity). The *TOP Clinical Scales*  
 506 (TOP-CS; see Appendix B) consist of 58 items assessing 12 symptom and functional (including strengths) domains  
 507 (risk-adjusted based on the case mix assessment; see Appendix C): work functioning, sexual functioning, social  
 508 conflict, depression, panic (somatic anxiety), psychosis, suicidal ideation, violence, mania, sleep, substance abuse,  
 509 and quality of life. Global symptom severity can also be assessed by summing all items or by averaging the z-scores  
 510 (i.e., standard deviation units relative to the general population mean; see Appendix D for a sample report) across  
 511 each of the 12 clinical scales. Domain-specific symptom severity is quantified as the risk-adjusted individual z-  
 512 scores for each clinical scale. For our primary analyses, we will assess change rates on global distress/symptom  
 513 severity for the entire sample, and change rates on the most salient distress domains (i.e., the most elevated scales on  
 514 which patients in the matched condition were matched to therapist strength) for patient subsamples. The TOP has  
 515 been shown to have excellent factorial structure, as well as good 1-week test-retest reliability across the 12 scales. It  
 516 is sensitive to change while possessing limited floor and ceiling effects<sup>30</sup>. The TOP also has demonstrated good

517 convergent validity<sup>58</sup> with scales like the Beck Depression Inventory<sup>58</sup> and the Brief Symptom Inventory<sup>59</sup>.

518 The prototype for our scientific match protocol was established in our prior work on ascertaining “effective,”  
 519 “neutral,” or “ineffective” therapists within a TOP outcome domain<sup>17,26</sup>. These classifications are based on the  
 520 Reliable Change Index (RCI), an established procedure in clinical research that determines whether patient change  
 521 exceeds the measurement error of the scale<sup>60</sup>. Following this strategy, we will first conduct a naturalistic baseline  
 522 assessment of therapists’ performance across 15 past cases for which baseline and follow-up TOP data exist to  
 523 determine their strengths and weaknesses in treating the 12 TOP domains. TOP change assessed through the follow-  
 524 up period will inform the matching in the trial. If a patient’s score on a given TOP scale exceeds the RCI for that  
 525 scale, change will be considered to exceed the TOP’s measurement error and the patient will be considered reliably  
 526 changed. The direction of reliable change determines improvement (decreased TOP scores) or deterioration  
 527 (increased TOP scores). An “effective” therapist on a given domain (e.g., depression, work functioning) will be one  
 528 whose average patient (across his or her 15 baseline cases) reliably improves. An “ineffective” therapist will be one  
 529 whose average patient reliably deteriorates. A “neutral” therapist will be one whose average patient neither reliably  
 530 improves nor deteriorates (i.e., maintains initial level of severity). These classifications will be made for all 12 TOP  
 531 scales; thus, therapists can demonstrate multiple strengths, multiple weaknesses, and multiple domains for which  
 532 they affect little to no change. It is these varying Report Card *profiles* that will allow us to match therapists to  
 533 subsequent patients based on their baseline track record.

534 Following this naturalistic baseline period, new, successive patients presenting to PBC and consenting to  
 535 participate in the RCT will be randomized to condition (and remain blind to it), with patients in the match condition  
 536 being assigned to therapists from a short-list of those who would be an empirically good fit to that patient. The  
 537 algorithm generates the short list based on 5 levels of match, ranging from highest to lowest:

- 538
- 539 1. The therapist is effective in treating the patient’s 3 most elevated TOP domains, and is not ineffective
- 540 on any TOP domain
- 541 2. The therapist is effective in treating the patient’s single most elevated TOP domain, and is not
- 542 ineffective on any TOP domain
- 543 3. The therapist is effective in treating the patient’s 3 most elevated TOP domains, though may be
- 544 ineffective on others
- 545 4. The therapist is effective in treating the patient’s single most elevated TOP domain, though may be
- 546 ineffective on others
- 547 5. The therapist is not considered effective on any elevated domain, but is also not ineffective on any
- 548 domain
- 549

550 (Note that patients randomly assigned to the non-match condition will be assigned as per usual procedure within  
 551 PBC; thus, as the logical, ecologically valid comparator, patients in this condition may or may not have matched  
 552 domains due to the natural odds.) To determine elevation, all TOP domains for each patient will be ranked ordered  
 553 for distance away from the general population (i.e., standard deviations beyond the non-clinical reference group).  
 554 Variability in the match level within the match condition, and naturally occurring match variability in the control  
 555 condition will allow us to measure degree of match dimensionally as a moderator variable of our main treatment  
 556 effect (an HTE question). We will treat match degree as a ratio variable (i.e., number of matched domains to number  
 557 of elevated domains >2 SDs away from the general population). Further, because we are not controlling for severity  
 558 of elevation on a given domain beyond the minimum of a patient being 2 SDs more severe than the general  
 559 population, we will also have random variability on patient severity of presenting problems that also can be tested  
 560 as a moderator treatment effects (an HTE question). For example, one patient’s most elevated scale could be 2.5  
 561 SDs from the mean of the general population, while another patient’s might be 6 SDs from the general population.  
 562 We will also examine complexity as a potential moderator (i.e., the number of elevated domains; another HTE  
 563 question).

564 To evaluate outcome with an index separate from the TOP (to test convergence and enhance the validity of any  
 565 condition effects), we will also assess global distress with the *Symptom Checklist-10* (SCL-10<sup>61</sup>), a 10-item, well  
 566 validated and widely used self-report inventory that assesses psychological wellbeing.

567 **Treatment process evaluations.** We will assess multiple patient-level process variables repeatedly over time  
 568 (i.e., every other session). To assess the quality of the patient-therapist relationship, both patients and therapists will  
 569 complete respective versions of the short form of the *Working Alliance Inventory* (WAI<sup>62</sup>). The WAI is the most  
 570 widely used alliance measure, and the short form has demonstrated sound psychometric properties. To assess patient  
 571 and therapist outcome expectations, each will complete respective versions of the *Credibility/Expectancy*  
 572 *Questionnaire* (CEQ<sup>63</sup>), a widely used and psychometrically sound measure of perceived logicalness of a given

573 treatment and expectations for the personal efficacy of that treatment. Patient dropout will be assessed with a study-  
574 specific *Nature of Termination Form*. Patient satisfaction will be assessed with the *TOP Satisfaction Scale*.

575 **Data collection schedule.** For the sake of the trial, and to maximize ecological validity, “treatment outcome”  
576 will be considered the point at which the patient and therapist mutually terminate or 16 weeks, whichever comes  
577 later. For a subsample of stakeholders, we will conduct post-trial exit interviews ( $Ns = 5$  patients, 5 therapists, 5  
578 administrators) to gather invaluable input on how to be responsive to the study findings in terms of dissemination,  
579 implementation, and policymaking, including the potential importance of integrating diagnosis, provider age, race,  
580 or gender into subsequent matching approaches. We will recruit stakeholders in order of completion until we reach  
581 our target  $Ns$  (therapists can only be involved once they have treated all 6 of their study patients). Fully reflecting  
582 stakeholder engagement, and to eliminate any biases or power dynamics introduced by the PIs or their research staff,  
583 Advisory Board members will conduct the individual interviews. The PIs (Constantino & Boswell) will train 3  
584 Advisory Board members on qualitative interviewing, and each will administer 1-2 pilot interviews as part of the  
585 training, plus 5 study interviews. The interviews will be conducted and audio-recorded via a webconferencing  
586 service and will last approximately 60 min. Participants will be compensated \$100 for their time. RAs will transcribe  
587 the interviews, removing any identifying patient information.

588 **Data management.** TOP assessment is coordinated and processed through PBC and ORI’s well-established  
589 business agreement. All supplemental, study-specific measures will be completed via a secure web-based platform  
590 managed by the research team.

591 **Data analysis.** The primary efficacy/outcome measure will be the TOP-CS total score. To take full advantage  
592 of its longitudinal assessment, hierarchical linear modeling (HLM<sup>64</sup>) will be used to examine rates and patterns of  
593 change, as well as levels of treatment outcome at specific time points (e.g., beginning, middle, and end of therapy).  
594 A 3-level HLM model will be used to estimate within-patient differences (level 1), between-patient differences  
595 (level 2), and between-therapist differences (level 3). At level 1, a change trajectory will be fit to each individual’s  
596 TOP scores across treatment. We will fit a series of models to determine whether a linear, quadratic, or cubic model  
597 best fits the data. If there is significant variability in individual trajectories and outcome levels, a level 2 model will  
598 be estimated with patient-specific covariates. Our primary interest is examining change trajectories and outcome  
599 levels as a function of treatment condition, which will be analyzed at level 2. Estimates of effect size ( $r^2$  & pseudo-  
600  $r^2$ ) will be calculated by standardizing the coefficients from the HLM model. Multilevel modeling is currently the  
601 most suitable method for analyzing longitudinal data, as it accounts for the dependent data in repeated measures  
602 designs, provides more accurate estimates of standard errors, and addresses missing data in outcome variables<sup>64</sup>.

603 In addition to the primary TOP total score, we will assess secondary outcomes, including SCL-10, alliance  
604 quality, patient outcome expectations, patient satisfaction, dropout, and domain-specific TOP scores. SCL-10,  
605 alliance quality, outcome expectations, and satisfaction are continuous variables that will be measured repeatedly  
606 across the 16 weeks of treatment, and we will assess these with 3-level growth models as described for the TOP total  
607 score. Dropout will be a binary yes/no variable, which we will assess with a 2-level logistic model with patients  
608 nested within therapists. We will analyze the secondary outcome of domain-specific TOP scores; that is, TOP  
609 change as a function of condition on the most elevated presenting domain (which for patients in the match condition  
610 would, in most cases, be the domain on which they were matched to their provider). To maintain power, and to  
611 maintain the appropriate multilevel structure, we will run the same model as above (powered to the same degree)  
612 with the outcome being each person’s standardized score on their most elevated TOP domain.

613 Secondary analyses will include assessment of potential moderators, the modeling of variability in patient  
614 outcomes, and the exploration of site effects. First, we will include 4 moderator variables in the multilevel  
615 framework outlined previously to determine whether race, the degree of match, distress severity, or distress  
616 complexity (all modeled at level 2) moderate the relation between treatment and outcome change rates or scores at  
617 specific time points. Second, we expect more variability in outcomes among patients in the non-match group relative  
618 to the match group, which would support the scientific match promoting more consistently good outcomes among  
619 patients. We will assess this hypothesis by modeling the heterogeneity of level-1 variances as a function of treatment  
620 status in a 2-level HLM model with patients nested within therapists. Third, we will examine medication as a  
621 correlate of outcome and, if significant, we will include this as a covariate in our primary statistical models. The  
622 analyses outlined *meet PCORIs’ standards on data integrity and rigorous analyses*.

623 In longitudinal studies, there may be missing values due to missed occasions and/or attrition. We will employ  
624 state-of-the-art techniques for missing data. When missingness is deemed to be completely at random (MCAR) or at  
625 random (MAR)<sup>65</sup>, we will employ inference by multiple imputation. Using routines developed by Schafer and  
626 Yucel<sup>66</sup> and Yucel<sup>67</sup>, we will incorporate the longitudinal design in the imputation phase. We will conduct sensitivity  
627 analyses to gauge the impact of departures from MCAR/MAR, and employ pattern-mixture models<sup>68; 69</sup>, which lead

628 to valid inferences under missing not at random, and compare inferential quantities with those that assume  
629 MCAR/MAR. Our handling of missing data *meets PCORI's standards for handling missing data*.

630 For the exit interviews, Co-PIs Constantino and Boswell will train a team of 4 RAs (2 at UMass, 2 at SUNY  
631 Albany) to serve as primary judges of the interview data. Drs. Constantino and Boswell will serve as data auditors.  
632 Data will be analyzed according to a blend of grounded theory (GTA<sup>70</sup>) and consensual qualitative research  
633 (CQR<sup>71</sup>), an inductive method that allows investigators to gain a rich understanding of participants' perceptions of  
634 the target phenomena. The 4 judges will first independently identify broad content domains from several transcripts  
635 until domain saturation has been achieved. Any discrepancies in domain formation will be settled via discussion and  
636 consensus among the coding team. After the content domains are established, the judges will then independently  
637 open code the material to identify meaning units that represent participants' complete thoughts about the focal  
638 domains. Open coding involves the primary exploration of the data, through a process of discussion and constant  
639 comparison to participant responses to identify categories, concepts, and properties<sup>72,73</sup>. Discrepancies in the open  
640 coding will be settled via discussion and consensus. As part of the open coding, meaning units are successively  
641 sorted into their representative categories that represent commonalities both within and between transcripts. This  
642 process continues across transcripts, with modifications being made to the data structure as needed. As another layer  
643 of consensual coding to reduce bias and increase reliability, data auditors will provide feedback at both the domain  
644 generation and open coding phases. Back and forth between coders and auditors continues until consensus is  
645 achieved. Data saturation is achieved when additional data would not add to the understanding of the phenomenon;  
646 we expect that 15 interviews will be sufficient to demonstrate saturation.

#### 647 **Alternative Design Considerations**

648 We considered various design options before finalizing this plan. First, we considered using a more  
649 homogeneous sample; that is, patients with a primary elevation on 1 prevalent TOP domain. Although this would  
650 have simplified the match and increased internal validity, we felt that it would have sacrificed ecological validity  
651 and the ability to deliver our match protocol to PBC which sees patients with various and complex problems.  
652 Further, ruling out patients would render our study less *patient-centered* (this concern was also specifically  
653 identified by Advisory Board members), and it would likely create more disruption for our partner PBC clinic  
654 (limiting immediate dissemination and implementation plans if we find an effect...such deliverables are central to  
655 PCORI). Finally, the mental health field as a whole is moving away from focused RCTs on discrete diagnostic  
656 categories<sup>74, 75</sup>.

657 Second, we considered a third comparison group, involving matching patients to therapists' self-perceived  
658 strengths. However, the literature suggests therapists have limited variability in their self-proclaimed strengths; they  
659 tend to believe they are strong at treating most problems<sup>76</sup>. Thus, it would have been difficult to create this  
660 condition. Moreover, adding a third condition causes problems such as increasing the required sample size (and  
661 project costs) and creating more differences between the conditions, thus compromising our ability to isolate  
662 causation. Given these concerns, we chose our two-group comparison, and decided instead to measure therapist  
663 accuracy of self-perceived strengths in ancillary analyses.

664 Third, we considered making sure that patients in the non-match group were intentionally assigned to a non-  
665 matched therapist. This would address the problem that any assignment-as-usual is going to occasionally, and  
666 randomly, lead to a good match. If this is a common occurrence, it might attenuate a between group match effect.  
667 However, making these non-matched assignments would not reflect customary case assignment in these clinics.  
668 Administrators would never intentionally make scientifically informed ill-matched assignments, as that could be  
669 considered unethical. Thus, we felt it was vital to retain usual case assignment as the control condition, and to track  
670 how often (and how well) patients in the control group were matched. We do not expect the number of instances to  
671 be so high as to wash out an effect; we should be sufficiently powered to be robust to this problem. However, the  
672 possibility of any attenuation is the rationale for modeling patient outcome variability by condition as another means  
673 to determine the influence of the match protocol.

#### 674 675 **D. Project Milestones and Timeline**

676 The overarching goal of this project is to demonstrate the comparative effectiveness of a scientifically derived  
677 patient-provider matching intervention that can be integrated into MHC systems to aid in treatment decision-making,  
678 as well as increase personalization. Toward this end, our goals will be to maximize stakeholder engagement  
679 throughout the process, demonstrate the feasibility and scalability of the intervention, and disseminate our results in  
680 scientific and professional outlets, as well as direct-to-consumer outlets (e.g., study website, newsletters, brochures,  
681 local conferences, visiting chapter meetings). Progress reports will be submitted every 6 months. Throughout the  
682 study period, we will convene regular Advisory Board and DSMB meetings. Minutes will be recorded at each  
683 meeting, and brief reports will be disseminated describing the meeting content and outcomes. Major outcomes at the

684 end of the first year will be (a) demonstration of the scalability of the match intervention that will be implemented in  
 685 the RCT beginning in year two, and (b) registration of the trial with clinicaltrials.gov. By the end of the second year,  
 686 we plan to submit a brief report that includes preliminary analyses after 50% of the patient RCT sample has been  
 687 recruited. By the end of the third year, we will complete the active RCT and primary data analyses. In addition, we  
 688 will submit a final manuscript reporting the primary study outcomes to a high quality, high visibility journal, as well  
 689 as submit final data sets and codebooks to PCORI. We will also submit a study journal that cohesively catalogues  
 690 “lessons learned” and the efforts of the Advisory Board over the course the study. Finally, we will engage in all  
 691 dissemination efforts, including adding a plain language summary of results to a website that can be accessed by  
 692 participants (as they will be informed at the time of debriefing). Please see the most recent Timeline/Milestone  
 693 document for more specific information.  
 694

#### 695 E. Patient Population

696 The patient population will be adult men and women (age 18-70) referred to PBC for MHC. Recall that the  
 697 baseline phase (to determine therapist report cards) does not require active patient recruitment, but rather draws on  
 698 historical data from 15 cases previously treated by eligible PBC clinicians. Given PBC’s large referral stream (950  
 699 new scheduled patients each month), we anticipate no insurmountable difficulties when we actively recruit patients  
 700 to enroll in the RCT. Moreover, we expect a high participation rate given the low burden and minimal change from  
 701 treatment-as-usual. For the RCT, based on our power calculations, the *goal patient participant is N = 281* (accounts  
 702 for a conservative estimate of potential attrition). As this is an effectiveness design with a premium on ecological  
 703 validity and scalability, virtually all patients in the network will be eligible. It is most likely that the sample will be  
 704 predominated by the following problem domains: depression, panic, substance abuse, suicidality, and poor quality of  
 705 life. The only study-related patient-level exclusion criterion will be patients who are not the primary, informed  
 706 decision-maker for their care. Thus, patients will present with a multitude of presenting problems across a spectrum  
 707 of *Diagnostic and Statistical Manual of Mental Disorders* (5th ed.; DSM-5<sup>48</sup>) diagnoses (including high severity,  
 708 chronicity, and comorbidity rates typical at PBC).

709 The composition of our study sample will roughly match the average PBC utilization data for age, gender, race,  
 710 and ethnicity. These projections are based on administrative data from the broad PBC system. Percentages are likely  
 711 to vary slightly between specific service settings. That being said, it is reasonable to expect the average age to be 40  
 712 years, and that ~62% of patients will be female (~38% male). For race, based on recent PBC outpatient data, we  
 713 expect the following: ~77% White, ~12% Black/African American, ~2% Asian, ~2% multiracial, ~6% Hispanic,  
 714 and less than 1% Native American and Hawaiian/Pacific Islander. With this composition, we can analyze HTE on  
 715 gender, race, and ethnicity as patient-level moderators.

716 Recruitment will be coordinated among our project coordinator, PBC intake and research staff members, and  
 717 PBC administrators. Patients will be ensured that their participation in the trial will largely mimic the same  
 718 treatment at the PBC site that they would receive if they were not participating. All patients will be told that the  
 719 study is examining various referral processes that will not affect the nature their treatment (though *may* help  
 720 connecting them to a well-matched therapist). Patients will also be informed that they will complete all assessments  
 721 that are part of their standard clinical care within PBC, as well as several study-specific measures. For completing  
 722 the additional measures, each patient will be compensated \$50 total. The research Advisory Board will closely  
 723 monitor recruitment numbers and work with PBC site administrators to address potential systemic barriers, should  
 724 the need arise.  
 725  
 726

#### Recruitment Plan

|                                                                               |                                                                                                                                              |
|-------------------------------------------------------------------------------|----------------------------------------------------------------------------------------------------------------------------------------------|
| Total number of study participants expected to be screened:                   | ~11,000                                                                                                                                      |
| Total number of study participants expected to be eligible of those screened: | ~7,000                                                                                                                                       |
| Target sample size (use same number stated in milestones):                    | 211 usable cases in our data analysis (will require enrolling 281 patients when a taking a conservative 25% attrition estimate into account) |

727

728

#### Estimated Final Racial/Ethnic and Gender Enrollment Table

| Race                          | Male (N) | Female (N) | Total (N) |
|-------------------------------|----------|------------|-----------|
| American Indian/Alaska Native | 1        | 0          | 1         |
| Asian                         | 2        | 4          | 6         |
| Black/African American        | 14       | 23         | 37        |
| Hawaiian/Pacific Islander     | 0        | 1          | 1         |
| White                         | 87       | 143        | 230       |
| Multirace                     | 2        | 4          | 6         |
| Ethnicity                     | Male (N) | Female (N) | Total (N) |
| Hispanic (Latino/Latina)      | 6        | 11         | 17        |
| Non-Hispanic                  | 100      | 164        | 264       |

729

730

## F. Research Team and Environment

731

Our research team has been collaborating for years and is well qualified to undertake this research.

732

**Dr. Constantino (PI)** is an expert on psychotherapy process and outcome research. In his 18 years of

experience, he has conducted process research that has underscored complex and clinically important interactions

between participant (i.e., patient & therapist), relationship, and both theoretically specific and pantheoretical

intervention variables<sup>77, 78</sup>. Informed by this work, Dr. Constantino has also conducted multiple RCTs aimed at

enhancing the efficacy of evidence-based psychotherapies for depression<sup>79</sup> and generalized anxiety disorder (CIHR-

funded RCT in progress). Dr. Constantino also has extensive experience examining interpersonal processes as

predictors, moderators, mediators, and/or outcomes of psychotherapy using self-report, other report, independent

coder, and qualitative methodologies<sup>80, 81</sup>. He has also produced a number of empirical and clinical-conceptual

papers on psychotherapy change theory<sup>82</sup>, psychotherapy training<sup>83</sup>, harmful therapy effects<sup>84</sup>, and routine outcomes

monitoring in mental health care settings<sup>85, 27</sup>. Finally, Dr. Constantino has experience with multilevel modeling in

psychotherapy research<sup>86</sup>, as well as grounded theory and consensual qualitative research approaches<sup>87</sup>. Dr.

Constantino's expertise is underscored in the numerous awards that he as received, as well as his election to his

current office as President of the North American Society for Psychotherapy Research. Dr. Constantino's research

environment and resources are described below in the Consortium Contractual Arrangements section.

**Dr. Boswell (Co-PI)** is an expert on psychotherapy process-outcome research, community-based research

methods, and measurement-based care. He has conducted process research on the complex interactions between

participant (i.e., patient & therapist), relationship, and intervention variables<sup>88, 89, 22, 90</sup>. This research has included the

identification of patient factors that moderate relationships with treatment outcome (e.g., readiness to change,

hostility), and the use of multilevel modeling to examine therapist effects<sup>88, 22</sup>. Dr. Boswell's research has utilized

both quantitative (e.g., HLM, SEM) and qualitative methods (e.g., CQR). He has produced a number of empirical

and clinical-conceptual papers and chapters on participatory research<sup>88, 91</sup>, outcome measure development<sup>57, 92</sup>, and

the implementation of measurement and feedback in routine mental health care settings<sup>42, 27</sup>. Dr. Boswell's expertise

in the area of performance measurement and feedback was underscored in his being invited to serve as a technical

expert panelist on the U.S. Department of Health and Human Services sponsored white paper on *Strategies for*

*Measuring the Quality of Psychotherapy*. Dr. Boswell's research environment and resources are described below in

the Consortium Contractual Arrangements section.

**Dr. Kraus (Co-PI)** is the developer of the TOP<sup>30</sup> and inventor of the unique software that drives services for

hospitals and behavioral health providers (US. Patent No. 7,415,663). Dr. Kraus also invented the scientific

matching protocol to be tested in the RCT (U.S. Patent No. 7,873,525), and he is successful in turning scientific

knowledge into consumer- and provider-based services<sup>93, 94</sup>. Stakeholder engagement in the modification of ORI

products and services, like the TOP, has been key to ORI's success. PBC is an ORI customer and has helped them

integrate TOP into all aspects of their intake and outcome monitoring protocols. ORI centrally processes all TOP

data as a public service and has amassed the world's largest de-identified database of behavioral health outcomes

that has been mined to advance the understanding of therapist effectiveness and provider quality improvement

initiatives<sup>17, 95</sup>. Kraus's team includes world-renowned experts in consumer-driven market research, who have

developed consumer-driven products for companies like FedEx, Volvo, BNY Mellon, and UPS. Dr. Kraus also leads

an experienced R&D and engineering staff that are collaborating with the Annie E. Casey Foundation in the

formation of a non-profit Institute for Child Outcomes (ICO) that is bringing scientific measurement and refining

769



770 scientific matching for abused and neglected children in child welfare system. Dr. Kraus's research environment and  
 771 resources are described below in the Consortium Contractual Arrangements section.

772 **Mr. Sykes (Co-PI)** is the Managing Director of Psychological and Behavioral Health Consultants, where he is  
 773 chiefly responsible for the design and implementation of the routine collection of quality metrics. His experience  
 774 includes clinical positions at the Cleveland Clinic and Glenbeigh Hospital, and senior executive positions at Willow  
 775 Creek Hospital, Windsor Hospital and Laurelwood Hospital. Mr. Sykes's specialization is in the treatment of  
 776 adolescents and young adults. He has authored more than a dozen professional publications, presented more than  
 777 100 times throughout the country, and has been recognized in *Who's Who Among Human Service Professionals and*  
 778 *Who's Who in the World*.

779  
 780 **The designated consultants** will each serve a specific and clearly defined role. Each has been consulted on the  
 781 present application, with further consultation to take place through project implementation.

782 **Mark Bauer, Neil Fontecchio, Kevin Kennedy, Sean Roohan, Michael Baskin, Abe Wolf, & Megan**  
 783 **Moran:** Board members will be heavily engaged in this project through monthly-to-bi-monthly meetings. Feedback  
 784 on all aspects of the trial will be elicited from not only the Advisory Board members, but also outside contributors  
 785 whom they represent (participating patients, other advocates at NAMI, etc.). Board members will be instrumental in  
 786 conducting the exit interviews, and they will play a central role in disseminating study information and results to  
 787 both scientific and stakeholder communities.

788 **Todd Farchione, Ph.D.; Liz Rekowski, nurse practitioner; Heather Wightman, social worker (Data**  
 789 **Safety and Monitoring Board [DSMB] members):** The DSMB is external to the project and at arms-length from  
 790 the PIs, vetting issues of conduct, safety, and integrity of the trial. All have experience with mental health care  
 791 and/or psychotherapy research, and will review procedures prior to initiating the study and will meet with the Co-PIs  
 792 every 6 months of the trial (6 times total).

793 **Center for Research on Families' (CRF) Methodological Program at the University of Massachusetts'**  
 794 **Amherst (statistical consultation services):** Dr. Aline Sayer, Director, is an expert in research design and statistical  
 795 methodology.

796 The Co-PIs and identified Advisory Board members to-date have been meeting and communicating regularly  
 797 via teleconference and email for the development and preparation of the proposed project. Contributors exchange  
 798 information freely on all aspects of project design and execution. The Co-PIs have a history of successful  
 799 collaborations and work extremely well together. PBC and ORI have a well-established partnership, as does ORI,  
 800 Albany, and UMass. The leadership team will continue to meet regularly through the entire project to discuss  
 801 activities and issues germane to its successful execution. All decisions are made jointly upon thorough discussion  
 802 and achievement of consensus. As noted in the support letters, people/places templates, and the Consortium  
 803 Contractual Arrangements section, the multiple environments involved in this project are appropriate and well  
 804 equipped to meet the project goals.

## 805 **G. Engagement Plan**

807 **1. PLANNING THE STUDY:** Patient and stakeholder partners have played and will continue to play critical roles  
 808 in this collaborative research. In recent years, we have developed collaborative relationships with partners  
 809 representing patient, clinician, and administrator perspectives. This has taken place through face-to-face meetings,  
 810 conference calls, manuscript writing, and conference presentations. These interactions began with shared interests  
 811 and motivations to improve mental health care decision-making and increase personalization through the use of  
 812 routinely collected outcome information. As a group, we were surprised by the clear absence of patient-centeredness  
 813 and engagement in this area. There was also a high degree of shared enthusiasm for PCORI's mission and goals.  
 814 Patient partners shared their frustration with finding "the right provider," and administrator and system partners  
 815 expressed a need for easily integrated data-driven processes (e.g., internal referrals) that improve outcomes,  
 816 efficiency, and reduce risk of harm. Providers acknowledged that they have not been helpful to all of their patients,  
 817 and that they would be interested in any strategy that could help them make better decisions and predict who is more  
 818 or less likely to benefit from work with them. In these meetings, patient partners highlighted the importance of  
 819 utilizing a diverse set of outcomes. In particular, they helped guide the decision to consider multiple domains of  
 820 functioning, including quality of life, rather than general symptom severity. They also advocated for broad inclusion  
 821 criteria, so that individuals with more severe and complex illnesses would be represented. Some of these partners  
 822 have formally joined the research team as **Advisory Board** members. All members of the Advisory Board helped  
 823 refine the study design and write this proposal. Stakeholder partners within PBC helped us to operationalize their  
 824 pragmatic case assignment as usual, the comparator in this study. Additional feedback from administrator partners  
 825 outside of the PBC setting increased our confidence that we had captured the standard, widely accepted, referral and

826 case assignment process in routine settings. In short, patient and stakeholder partners have been integral in  
827 developing the “soul” of this work, as well as relatively concrete elements of the design.

828  
829 **2. CONDUCTING THE STUDY:** Patient and stakeholder partners will play important roles in the conduct of this  
830 study. Most prominently, we have assembled the core of a project Advisory Board that includes diverse  
831 representatives: three patient partners who have experience receiving mental health services, two practicing  
832 psychotherapists (one a PhD psychologist in Cleveland, and one a LICSW in Boston), the Executive Director for the  
833 National Alliance on Mental Illness Greater Cleveland, and a psychiatrist and researcher at the VA’s Center for  
834 Healthcare Organization and Implementation Research in Boston. This Advisory Board will function as part of the  
835 core research team, and these board members have already contributed to the development of materials and  
836 protocols. Through continued discussion with current Advisory Board members and feedback from stakeholder  
837 partners, we will identify additional areas of importance that should be represented (e.g., recruit a board member  
838 who can best represent the primary care perspective). The Advisory Board will meet on a regular basis throughout  
839 the study, both face-to-face and via teleconference (see Timeline in Section D). Responsibilities will include:  
840 reviewing and finalizing assessment items and protocols (including consent forms), monitoring recruitment,  
841 monitoring responsible research conduct, monitoring methodology standards, reviewing the budget, discussing  
842 interim analyses, preparing presentations and content for dissemination, and communication of progress and  
843 outcomes to stakeholder groups. The process and outcomes of these Advisory Board meetings will be recorded and  
844 summarized in a written report that will include action items. These reports will also be sent to PCORI. The  
845 frequency and structure of these meetings will allow the Advisory Board to closely monitor study procedures and  
846 progress, as well as facilitate responsiveness to any issue that may arise (e.g., need to bolster recruitment activities;  
847 unforeseen study disruptions to PBC workflow). One key activity/goal of the Advisory Board will be to assist PBC  
848 in the development of its online patient portal where consumers will access key health related information, including  
849 outcome monitoring and feedback mechanisms. In addition, Advisory Board members will share the responsibility  
850 of conducting exit interviews with randomly selected study participants. We have also begun to assemble a data  
851 safety and monitoring board (DSMB) that represents multiple stakeholder perspectives. This DSMB will help ensure  
852 that our procedures are implemented in a manner that maximizes protection of participants at each stage and level.  
853 We will round out DSMB membership early in our milestone timeline.

854  
855 **3. DISSEMINATING THE STUDY RESULTS:** Advisory Board members will play a significant role in the  
856 planning and implementation of communication and dissemination efforts. Each identified Advisory Board member  
857 has made a commitment beyond the 3-year study period, including the post-study dissemination efforts in their  
858 respective communities. A particular strength of our Advisory Board is that not only will diverse patient and  
859 stakeholder partners be represented, but members have pre-existing relationships with key communication and  
860 dissemination targets, including advocacy groups that often serve important dissemination functions for patients and  
861 other key stakeholders (e.g., Institute of Medicine, Robert Wood Johnson Foundation, Veterans Administration). For  
862 example, we have established collaborative relationships with several National Alliance on Mental Illness (NAMI)  
863 chapters. Members of our Advisory Board have functioned as representatives for this organization, and are  
864 committed to disseminating progress and outcome information (e.g., presenting findings at meetings and through  
865 listserves and newsletters). We have been invited by the editor of the Schenectady NAMI E-Newsletter to submit  
866 articles related to PCORI and this project; the drafting of such articles and letters will be a collaborative process. We  
867 have also established a connection with the Berkshire Coalition for Suicide Prevention and Empowerment  
868 Exchanges that serve a number of vital functions for mental health care consumers. We will pursue these outlets at  
869 various stages during the project, as well as following its completion. The Advisory Board will work directly with  
870 ORI and PBC to develop and execute mechanisms of dissemination to their wide customer and stakeholder bases.  
871 As we have done in previous practice-research network publications, Advisory Board members will serve as co-  
872 authors on empirical and conceptual manuscripts and presentations (professional conferences, as well as local  
873 patient advocacy conferences, such as those sponsored by the New York State Office of Mental Health). We have  
874 budgeted \$1,000 for each of two Advisory Board member representatives to attend 1-2 professional conferences.

875  
876 **4. PRINCIPLES FOR ENGAGEMENT**

877 • **Reciprocal Relationships:** In all elements of this research we will strive to maintain a non-hierarchical,  
878 collaborative process and structure. Nevertheless, members of the research team have been assembled to  
879 represent diverse perspectives and areas of expertise that complement one another and will create a synergy to  
880 optimize this work. We have included patient and stakeholder partners as key personnel, and have included  
881 biosketches for each individual that highlight the specific and diverse skills and experiences that will help

882 maximize this study's potential. For example, the PIs will be primarily responsible for the application of sound  
 883 scientific methods (that meet PCORI's standards), budget oversight, and direct communication with  
 884 institutional IRB (e.g., initial approval and renewals), PCORI (e.g., progress reports), and professional journals  
 885 (e.g., communicating directly with journal action editors regarding manuscripts). Whenever possible, Advisory  
 886 Board members (patient and stakeholder partners) will also be involved in such decision-making. For example,  
 887 Advisory Board members will co-author manuscripts and assist with revisions. Patient partners will not be  
 888 involved in patient recruitment, but will be directly involved in the development of recruitment and consent  
 889 materials (e.g., to ensure the language is clear and understandable), the final assessment protocols, and assuring  
 890 that the methods and deliverables maintain a high degree of patient-centeredness. Advisory Board members  
 891 with expertise in implementation and policy will be more directly involved in steering communication and  
 892 dissemination activities.

- 893 • **Co-learning:** Several strategies will be employed to ensure that patient and stakeholder partners understand the  
 894 research process. For example, all thus far identified Advisory Board members have already reviewed PCORI's  
 895 Methodology Standards, as well as read and contributed to this proposal. Given their prominent role in the  
 896 research, all patient and stakeholder partners (if not already completed) will need to complete ethical conduct of  
 897 research training. Specifically, each member will either complete or update CITI research ethics training (e.g.,  
 898 human subjects research and HIPAA modules). We will also review key Methodology Standards and Protection  
 899 of Human Subjects information as part of our regular Advisory Board meetings. Advisory Board members  
 900 coming from more traditional academic backgrounds (e.g., the PIs) will engage in activities to better understand  
 901 patient and stakeholder engagement and patient-centeredness. Specifically, these Advisory Board members will  
 902 attend local NAMI and Empowerment Exchange meetings to gain additional information and perspective on  
 903 patient concerns and values. In addition, the PIs will attend meetings and review articles and information  
 904 disseminated through the University at Albany Faculty Committee for Community Engaged Research  
 905 (FCCER), as well as attend Community Mental Health Forums that are sponsored by local communities in  
 906 affiliation with university partners who are engaged in community based participatory research.
- 907 • **Partnership:** We highly value the time and effort that patient and stakeholder partners have already devoted,  
 908 and are committing to devote, to this work. Our patient and stakeholder partners represent key stakeholder  
 909 groups implicated in the present research, and this representativeness will broaden further upon the finalization  
 910 of the Advisory Board roster. These contributions are vital to the success of this project. Consequently, we have  
 911 included financial compensation for Advisory Board members in the requested budget. Patient and stakeholder  
 912 partners will be compensated \$100/hour for their participation in the many scheduled Advisory Board meetings.  
 913 In addition, we have included reimbursement for patient and stakeholder partner travel to and from in-person  
 914 Advisory Board meetings, as well as professional conferences. All in-person and teleconference meetings will  
 915 be held at a time that is convenient for patient partners. Finally, as noted, patient partners will be co-authors on  
 916 manuscripts and presentations.
- 917 • **Trust, Transparency, Honesty:** By necessity, day-to-day research conduct and decisions will be made by the  
 918 designated research personnel. However, the Advisory Board is being constructed to maximize oversight and  
 919 collaborative decision-making. The primary context for sharing ideas and decision-making will be regularly  
 920 scheduled Advisory Board meetings. Research procedures, updates, and impending milestones will be  
 921 collaboratively reviewed and confirmed during these meetings. The final product of each meeting will be a brief  
 922 report that represents the diverse perspectives of the board. The PIs will be responsible for sending this  
 923 document, but it will need to be approved by all board members (a similar process will be utilized for other  
 924 reports and written materials such as conference proposals, manuscripts, newsletters, and any IRB  
 925 modification). We have scheduled a total of 21 separate Advisory Board meetings over the three-year study  
 926 period. A minimum of one meeting per year will be in-person. Each meeting will convene for approximately  
 927 one hour. More frequent, informal communication will take place via email and on the telephone. We will  
 928 utilize more streamlined communication strategies where possible (e.g., establish an email list, share documents  
 929 via cloud storage). Transparency will also be enhanced by explicitly integrating the *Engagement ACTivity*  
 930 (*ENACT*) *Inventory* into Advisory Board meetings to objectively assess our level of engagement to make sure  
 931 that we are on track.  
 932

## DISSEMINATION AND IMPLEMENTATION POTENTIAL

933  
934  
935  
936  
937  
938  
939  
940  
941  
942  
943  
944  
945  
946  
947  
948  
949  
950  
951  
952  
953  
954  
955  
956  
957  
958  
959  
960  
961  
962  
963  
964  
965  
966  
967  
968  
969  
970  
971  
972  
973  
974  
975  
976  
977  
978  
979  
980  
981  
982  
983  
984  
985  
986  
987  
988

### A. Describe the potential for disseminating and implementing the results of this research in other settings.

Given the ease of reproducibility and scalability of the proposed scientific match algorithm, we believe that the results will have enormous dissemination and implementation potential. We have devised a multicomponent, collaborative dissemination and implementation plan. Dissemination efforts will actually begin prior to the completion of the study period. We will have ongoing communication with stakeholder groups, which will be facilitated by our Advisory Board members. Our Board members are well connected in local and regional communities. We will utilize multiple media outlets, including university-driven media reports. For example, results will be disseminated in a NAMI newsletter. We will also convene a conference for stakeholders and advocates where we will discuss the research results, implications, and implementation strategies. In addition, we will present our findings at national and international scientific, professional, and advocacy conferences (e.g., American Psychological Association, Society for Psychotherapy Research, NY and MA State NAMI conventions). Multiple advisory board members will have the opportunity to collaborate on presentations. We will also pursue dissemination through publication in widely circulated peer-review journals.

If the scientific matching tool does not lead to differentially positive outcomes in the RCT, the Advisory Board will meet to discuss components of the research proposal and results that might be of interest to relevant stakeholder groups. For example, patients may still value having access to provider information, regardless of the specific impact on observed outcomes. Alternatively, PBC can still use patient-focused outcomes data to inform resource allocation and training initiatives. The Advisory Board will also discuss future research plans and patient-centered initiatives.

ORI is the largest behavioral health outcomes management system in the United States. Research results will be disseminated to ORI clients and partners across the country. Rapid implementation will also begin upon project completion, starting with our partner PBC. A key to ORI's dissemination success is delivering new scientific information *just in time*, at the point in care when critical decisions are made. Attached to a TOP client report (which is scored and delivered in real-time) are new and relevant research citations that can inform therapy responsiveness to patients who may not be responding to treatment, or even deteriorating. ORI has built such systems for individual patients who screen positive for likelihood of adverse outcomes, including hospitalization<sup>88</sup>, and for entire mental health care networks based on risk-adjusted, benchmarked, aggregate data tied to libraries of evidence-based practices and principles.

Based on the results of the trial, direct-to-patient scientific matching strategies (promoted through primary care offices) will be piloted in OH, MA, and NY. The identified scientific matching algorithm and feedback system will no doubt continue to be refined with the accumulation of new data and implementation in new, diverse settings. Additional test-sites are currently under negotiation with Medicaid in North Carolina, Colorado, and Delaware. Due to our patient-centered research approach and rigorous methodology, we believe our scientific matching strategy will represent the optimal decision-making intervention of its kind. Showing that scientific matching feedback significantly improves valued outcomes and patient and stakeholder decision-making capabilities will revolutionize the provider referral and case assignment process in mental health care. Because reliable estimates can be obtained on a small sample of patients per therapist, matching algorithms can be employed quite rapidly. In addition, such a system is likely to be of tremendous value to various stakeholders—patients, administrators, insurance companies, providers, trainers/supervisors; this widespread relevance will also facilitate rapid adoption and use.

### B. Describe possible barriers to disseminating and implementing the results of this research in other settings.

We do not anticipate significant barriers to disseminating and implementing the results of this research in other settings. This is for several reasons. First, as part of this research, the matching system will be further developed and refined based on the interests and values of actual patients, therapists, and administrators. Second, our sample and the research context will be representative of other settings, including treatment settings that are typically under-resourced and serve complex populations. Third, a reliable matching algorithm can be established in relatively little time and with minimal burden.

Although highly unlikely, potential barriers may exist. For example, some treatment settings may simply refuse to collect outcomes data. Data must be collected to “teach” the algorithm. In reality, due to a variety of pressures, it will be difficult to find such a setting in the near future. Furthermore, patients consistently demonstrate highly favorable attitudes toward outcomes monitoring and feedback<sup>103</sup>. Another possible barrier is that different settings use alternative measurement systems; however, we have every reason to believe that the matching strategy being tested in the proposed research could be replicated with other outcome tools, which ultimately represents a strength.

989 **C. Describe how you will make study results available to study participants after you complete your**  
990 **analyses.**

991 All participating patients and therapists will be fully debriefed following the study and offered an opportunity to  
992 provide feedback on their experience. Participants will also be informed at the time of debriefing that the final study  
993 results will be made available to them in form of a brief, plain language summary. Participants can choose to have  
994 the summary sent as a PDF in an email, or they can access a study-specific website. The website will be updated  
995 throughout the trial, and will include the results summary once available. The website URL will be provided at the  
996 time of debriefing, which will allow patients to opt out of providing an email address.

997

## REPLICATION AND REPRODUCIBILITY OF RESEARCH AND DATA SHARING

998 **A. Describe the ability to reproduce potentially important findings from this research in other data sets and**  
999 **populations.**

1000 Findings will have a high degree of reproducibility and scalability, and the implications reach  
1001 beyond mental health care (MHC). First, our sample and the research context will be highly  
1002 representative of MHC consumer populations and routine community treatment settings, including  
1003 treatment settings that serve more severe and complex patients. Arguably the most critical factor is the  
1004 ability to replicate and reproduce the empirical matching intervention (algorithm). The present research will  
1005 actually represent the third time that this particular outcome monitoring system (TOP) has been used to  
1006 develop a predictive algorithm on a new sample of providers. The match technology is dependent on  
1007 gathering data from multiple providers treating multiple patients; however, our own work and other research  
1008 has demonstrated that relatively few cases are needed per provider to obtain estimates that will result in a  
1009 match that will outperform pragmatic or random case assignment. We expect to demonstrate that once  
1010 routine outcome monitoring is integrated into a health care system, it does not take long to gather sufficient  
1011 data to employ such a scientific matching system. The replicability and reproducibility potential of this work  
1012 extends beyond this specific outcome monitoring system. Theoretically, any reliable and valid  
1013 multidimensional measure of symptom and functioning domains of concern to patients and stakeholders  
1014 could be used to develop empirically derived matching algorithms. The particular domains of interest will  
1015 only depend on the context and area of healthcare, yet the care model will be easily reproducible and  
1016 improved upon as more data of importance to key stakeholders are integrated. The primary requirement for  
1017 reproducibility, reliability and validity will be the accumulation of sufficient data on a diverse sample of  
1018 patients and providers in identified settings. Once an outcome monitoring system is in place, healthcare  
1019 systems can conduct similar CER in an attempt to replicate and examine generalizability of findings within  
1020 and outside of MHC. It is also critical to note that the complexity of mental healthcare creates barriers for  
1021 dissemination, implementation, and reproducibility. For example, it takes a single clinician many months of  
1022 intensive training, supervision, and feedback to begin to deliver a complex multi-component psychosocial  
1023 treatment with a sufficient fidelity. In the absence of continued training and feedback, evidence demonstrates  
1024 that this clinician will eventually resort to previous practice patterns. Alternatively, a match algorithm can be  
1025 integrated into a *system* at low cost, produce measureable improvements in outcomes (and reductions in risk  
1026 of harm) within a short period of time, and be self-sustaining/enhancing. Our proposed research methods  
1027 will also maximize the ability to reproduce and replicate our findings. Specifically, our limited patient  
1028 exclusion criteria will increase the generalizability of our results to routine, naturalistic treatment settings. In  
1029 addition, we will create a detailed data codebook and dictionary, as well as a study journal that documents  
1030 the research process, key decision points, methods, and “lessons learned.” We will also register this trial  
1031 with ClinicalTrials.gov.

1032  
1033 **B. Describe how you will make available, within 9 months of the end of the final year of funding, a complete,**  
1034 **cleaned, de-identified copy of the final data set used in conducting the final analyses, or your data-**  
1035 **sharing plan, including the method by which you will make this data set available, if requested.**

1036 The research team will work diligently to develop and maintain a comprehensive, clean, and easily interpretable  
1037 data set with a clear codebook and dictionary. This will begin early in the conduct of the research with a sound data  
1038 management and checking plan. Most of the data collected in the proposed research will be in an electronic or web  
1039 based platform, so information will be downloaded into a database without the usual risk of human error that  
1040 coincides with data entry. In addition, ORI has been making such data sets available for analysis by academic  
1041 research teams (including Drs. Constantino and Boswell) for more than 10 years. Outcome Referrals has pre-  
1042 programmed computer routines that de-identify data and build the relevant data dictionaries. In addition, our conduct  
1043 of interim analyses will allow us to establish an intuitive data structure, variable list, and codebook well in advance  
1044 of the final analysis and delivery of the final, cleaned data set. A cleaned, de-identified copy of the final data set  
1045 used in conducting the primary analyses will be available upon request to the PIs. Data will be made available in  
1046 Microsoft Excel or SPSS file format. We will also donate the dataset to the Society for Psychotherapy Research  
1047 (SPR) Data Archive initiative.

1048 **C. Propose a budget to cover costs of your data-sharing plan, if requested.**

1049 The primary cost for data sharing will be software renewal. Database storage, management, and codes (e.g.,

1050 syntax for analysis) will rely on a continuation of software licenses. There may also be additional time costs for the  
1051 PIs and Advisory Board members (e.g., correspondences, review of request, material preparation, and potential  
1052 negotiation with SPR Executive Committee). Consequently, we propose a budget that includes funds for statistical  
1053 software license renewal fees (\$600) and the personnel time/effort cost of two additional Advisory Board meetings  
1054 (~8 members, \$100/hour, 2 hours = \$1600). The proposed total budget for covering data-sharing costs is \$2200.  
1055



1056  
1057  
1058  
1059  
1060  
1061  
1062  
1063  
1064  
1065  
1066  
1067  
1068  
1069  
1070  
1071  
1072  
1073  
1074  
1075  
1076  
1077  
1078  
1079  
1080  
1081  
1082  
1083  
1084  
1085  
1086  
1087  
1088  
1089  
1090  
1091  
1092  
1093  
1094  
1095  
1096  
1097  
1098  
1099  
1100  
1101  
1102  
1103  
1104  
1105  
1106  
1107  
1108  
1109  
1110

## **PROTECTION OF HUMAN SUBJECTS**

**Describe the protection of human subjects who will be involved in your research.**

### **4.1.1 Risks to Human Subjects**

#### **a. Human Subjects Involvement and Characteristics, and Design**

We will conduct a RCT involving PBC therapists and patients. Both categories of participant will be adult men and women (age 18-70) recruited from the PBC outpatient clinic. Virtually all patients who would be considered clinically appropriate outpatients at PBC will be eligible. The only exclusion criteria will be patients who are not the primary, informed decision-maker for their care and adults over age 70 years. The latter is because older adults (a) represent a small portion of patients at PBC, and (b) their mental health treatment is complicated by aging issues for which specialized care may be required. With no additional attempt to limit the variability of patients by diagnosis or other characteristics, patients will present with a multitude of presenting problems. Eligible, consenting patients will be randomly assigned to receive either naturalistic treatment with a scientifically matched provider or naturalistic treatment with a non-scientifically matched provider through pragmatic assignment as usual. No particularly vulnerable populations (e.g., prisoners, institutionalized) will be involved in the proposed research.

We anticipate that our therapist sample will resemble the existing PBC demographic statistics (see section C and the targeted/planned therapist enrollment Table in Appendix A for details). We also expect the composition of our patient sample to roughly match the average utilization data for gender, race, and ethnicity for PBC (see the “Estimated Final Racial/Ethnic and Gender Enrollment Table” that we included in section C).

**Collaborating Sites and Personnel.** Study recruitment and primary data collection will take place within PBC. All treatments will be conducted at PBC. The Co-PIs, project coordinator, PBC site staff members, PBC administrators, Advisory Board, and the DSMB will oversee recruitment, data collection, management, and protection. PBC routinely handles private health information and is in compliance with HIPAA regulations. Any “hard” materials that are collected will be stored in a locked cabinet in a locked office at the PBC site or PI’s institution. PBC site staff, PBC administrators, and Advisory Board members will ensure protection of data until the project coordinator or Co-PIs formally collect them. However, most of the data collection will be through a secure, web-based platform using a tablet or computer. This method offers greater protection because it guards against human error and negates the need for long-term storage of paper forms.

#### **b. Sources of Materials**

In the RCT, each patient will complete a battery of demographic, symptom, and functioning self-report measures. For the therapist baseline, participating PBC therapists will complete self-report measures assessing demographic information, clinical experience, license type, and dimensional ratings of the influence of various theoretical orientations on their treatment approach. Providers will also complete a study-specific measure to assess their beliefs about their effectiveness in treating the various TOP domains when uninformed about their prior data-driven TOP track record. Subsequent to the baseline assessment, each patient will complete self-report assessments of symptoms, functioning, and treatment process during the course of treatment and at post-treatment. A subset of patients will have the option of participating in a semi-structured exit interview conducted by an Advisory Board member.

The research will involve routine treatment conducted at PBC. Therefore, treating clinicians and administrators will have access to treatment-relevant private health information, as they would in routine practice. PBC routinely handles private health information and is HIPAA-compliant. Only designated study personnel will have access to identifiable, study specific, private information about human subjects. When registering on the TOP system, both patients and therapists are assigned a random number code that links all subsequent assessments and is separated from identifiable information. This random number code will function as each participant’s study code and will be used to link participants’ data. As noted, most of the data will be collected through a web-based platform. The assigned participant code will be used to link/aggregate information, so private information will not be requested after the baseline assessment/consent process. Only the PI and project coordinator will have access to the signed consent forms and the list that links identifiable information with the participant’s study code. This information will be temporarily stored in a locked cabinet in a locked office at PBC. At regular intervals, this information will be collected by the project coordinator or PI and taken to UMass for long-term secure storage. At this point, only the PI will have access to this identifiable information. Any audio recordings from exit interview will be immediately uploaded to a secure website. All data will be encrypted and password protected. Only the Co-PIs will know this password and have the capacity to access the recordings. When it is time to analyze the recordings, designated, trained coders will also have access to the recordings; however, they will not have access to additional identifiable information (only the information required to complete the analysis).

1111  
 1112  
 1113  
 1114  
 1115  
 1116  
 1117  
 1118  
 1119  
 1120  
 1121  
 1122  
 1123  
 1124  
 1125  
 1126  
 1127  
 1128  
 1129  
 1130  
 1131  
 1132  
 1133  
 1134  
 1135  
 1136  
 1137  
 1138  
 1139  
 1140  
 1141  
 1142  
 1143  
 1144  
 1145  
 1146  
 1147  
 1148  
 1149  
 1150  
 1151  
 1152  
 1153  
 1154  
 1155  
 1156  
 1157  
 1158  
 1159  
 1160  
 1161  
 1162  
 1163  
 1164  
 1165  
 1166

### **c. Potential Risks**

Regardless of condition, all participating therapists will employ their usual treatments and patients will be receiving their usual treatments. Consequently, there are no risks over and above what would normally be expected in routine psychotherapy. The major research question is whether or not scientific-matching significantly outperforms routine pragmatic case assignment. For those participants randomized to “pragmatic case assignment as usual”, they will be assigned to a therapist in a manner consistent with routine practice. Further, the primary outcome monitoring system (TOP) is already being used at PBC without incident.

As is typical in psychological research, some of the assessment questions may be experienced as intrusive and/or may cause anxiety. The risk from such increased anxiety, however, is minimized by the use of skilled and extensively trained assessors who are aware that such reactions may be related to a person’s presenting problems, or simply a function of the intimate and emotionally intense nature of psychological services. In addition, the PIs, project coordinator, and PBC site staff and administrators will be available to meet with any participant who may be unduly disturbed. In treatment, some individuals may experience emotional upset during sessions. Additionally, some participants may experience disappointment with their rate of progress or setbacks. The risk associated with such reactions will be minimized by the use of therapists who are sensitive to these issues and who have peer and administrative support. PBC has well-established procedures in place for managing treatment-related disturbances (although these are a natural part of treatment, rather than a unique risk of this research).

## **4.1.2 Adequacy of Protection Against Risks**

### **a. Recruitment and Informed Consent**

**Therapist participants** will be providers within PBC. Recruitment will be coordinated among our project coordinator, PBC site staff members, and PBC administrators, and will involve presenting information about the study to providers through flyers, verbal script, telephone, or email. Interested participants will meet or speak via teleconference with the project coordinator to learn about the study through the consent process. Therapists will be told that the study is examining various referral processes that will not affect their delivery of treatment-as-usual. They will be blind to the specific nature of the referral manipulation, but will be told that they will be fully debriefed following the study and offered an opportunity to provide feedback on their experience. Interested providers will need to agree to keep sufficient openings on their case roster until they meet their required case numbers (this will not be an issue for PBC providers). They will also be informed that their study patients will first undergo an in-person baseline assessment with a RA, as well as complete a few study-specific measures throughout treatment. Therapists will also need to consent to completing a few study specific therapist-report measures, and will be informed that they will be compensated \$50 per patient for this additional, but minimal, time burden.

**Patient participants** will flow into PBC via primary care referrals, hospital discharge referrals, internal office (PBC) referrals, or self-referrals. These referrals get logged into the electronic medical record. The intake specialist will then ask patients for permission to send, via email, a study consent form and baseline measures packet if they are interested in learning more about participation. If given verbal authorization to do so, the PBC intake specialist will the study link immediately. As part of the online consent document, patients are informed that their participation in the trial will largely mimic the same treatment that they would receive if they were not participating. However, to be enrolled, the patient must consent to be randomized, complete extra study-specific measures (before, during, and after treatment), and accept assignment to an eligible treatment format as per below. For completing the additional measures, each patient will be compensated \$50 total. Patients will also be asked to remain with the same therapist through at least 16 weeks of treatment. If a patient does not consent via the online form, their second call with the intake specialist will proceed as usual. If a patient consents to be enrolled, they have signed the consent form and completed a baseline survey of measures (including the TOP) through the online platform. Patients will then be randomized to condition and assigned to a provider based on the experimental parameters of that condition (i.e., scientific match vs. pragmatic match) on their second call with the intake specialist. From there, treatment proceeds as usual, with the project coordinator sending weekly measures to study patients via email for the duration of their treatment, or the 16-week outer limit for those in longer-term treatment. All patients who consent are sent a hand-written thank you note from the research team within 1 week of enrolling. Regardless of consent status, the project coordinator sends (within 1 week) a \$15 Amazon eGift card to all patients who view the consent form.

### **b. Protection Against Risks**

Consent forms and self-report data (therapist and patient) will be completed and stored via secure, password-protected web-based platforms. All participants will be informed about the nature of their involvement prior to

1167 participating. After participating, they will also be fully debriefed on the purpose of the study. Only the relevant  
 1168 members of the research team will have access to the participants' data and only the PI will have long-term  
 1169 access to identifiable information. As noted, all assessments will be linked with a de-identified participant code.  
 1170 Any records linking the code to the participants name or voice recording will be kept in a separate locked file  
 1171 cabinet in the PI's office. All hard copy data will be destroyed (via shredder) 5 years after publication of the  
 1172 primary findings.

1173 As noted above, this will be a low risk RCT. The Co-PIs, project coordinator, PBC site staff members, PBC  
 1174 administrators, and Advisory Board will monitor the treatments and data collection; thus, they can assist in  
 1175 regularly monitoring any adverse events. Such negative occurrences are unlikely to be trial-related, as all  
 1176 patients will be receiving treatment-as-usual. Therefore, any adverse event will be addressed with PBC's well-  
 1177 established procedures for monitoring services and managing treatment-related disturbances. Nevertheless, any  
 1178 adverse event will be recorded and immediately reported to the IRB, PCORI, and the DSMB.

1179 The potential risks associated with the assessment procedures and treatments will be minimized by the use  
 1180 of skilled assessors and therapists. Therapists will be meeting regularly with patients as part of routine  
 1181 treatment, and this will include monitoring changes in mood, behavior, and/or general mental status as they  
 1182 would in their typical practice. Should, during the course of the study, a patient show evidence of psychological  
 1183 or physical deterioration, the patient will be assessed comprehensively in the domains of concern (except in the  
 1184 case of a life-threatening physical emergency such as the emergence of acute chest pain, in which case 911 will  
 1185 be called immediately). If the therapist deems that the patient meets criteria for a psychiatric hold (e.g., patient  
 1186 is an imminent danger to self or others), the therapist will arrange for the patient to be brought to the emergency  
 1187 department and will contact his/her PBC administrator and the PI to debrief. If a patient is not meeting criteria  
 1188 for a psychiatric hold, but is showing clear signs of decreased mental status, the therapist will continue to meet  
 1189 with the patient, as well as - in consultation with the PBC administrator - make arrangements for the most  
 1190 appropriate level of care (e.g., day treatment).

1191 To ensure the safety and confidentiality of participants, any non-web based assessment material will be  
 1192 kept in a locked cabinet and office, and labeled with a study code only. The list of identifiable information that  
 1193 corresponds to the study codes will be kept separate from the other assessment materials in 2 forms: (1) a hard  
 1194 copy that will be stored in a locked filing cabinet in the PI's office, and (2) an electronic version that will be  
 1195 stored on the PI's password-protected office computer that is separate from where other materials and the main  
 1196 electronic database will be stored. Moreover, the signed consent forms will be maintained in the separate hard  
 1197 copy file just discussed, as this will also help to prevent participant names from being associated with study  
 1198 codes. The main electronic database will be maintained on a password-protected computer in a research office.  
 1199 All files and documents related to this study - whether stored at PBC or the PI's office - will be kept in either  
 1200 locked file cabinets and/or on password-protected computers. Only designated personnel involved in the study  
 1201 will have access to participant data, as needed. For any data used for research and publication purposes, the  
 1202 confidentiality of participant information will be ensured.

1203

#### 1204 **4.1.3 Potential Benefits of the Proposed Research to Human Subjects and Others**

1205 The most direct benefit a participant in this study may receive is the reduction of symptom-related distress  
 1206 and improved functioning. In addition, patients will receive more personalized mental healthcare.  
 1207 Psychotherapists may experience a greater level of positive impact across their caseloads. Given that the actual  
 1208 treatments being provided will not be manipulated, the benefits of participation are judged to far outweigh the  
 1209 potential study-specific risks.

1210

#### 1211 **4.1.4 Importance of the Knowledge to be Gained**

1212 The results of this patient-centered RCT will tell us whether or not (and to what degree) scientific matching  
 1213 outperforms routine pragmatic case assignment. If scientific matching demonstrates superior outcomes in this  
 1214 highly generalizable community mental health context (as we anticipate), then mental health systems will have a  
 1215 low-cost, scalable, data-driven approach to improving patient outcomes and increasing the personalization of  
 1216 care. Scientific matching can be easily transferred and adapted to other settings and health conditions. The  
 1217 importance of the knowledge to be gained far outweighs the low level of risk in this phase.

1218

#### 1219 **4.1.5 Data and Safety Monitoring Plan**

1220 Our data and safety monitoring plan is designed to meet the anticipated risks of this specific research. A  
 1221 comprehensive data safety and monitoring plan has been developed, involving (a) Co-PIs, (b) Advisory Board  
 1222 members, (c) IRB, (d) project coordinator, (e) and a formal DSMB. Adverse events will be immediately

1223 reported to the IRB, PCORI, and the DSMB. Although the research will be conducted in outpatient treatment  
 1224 settings, patients will be receiving naturalistic treatment as usual. Consequently, potential treatment-related adverse  
 1225 events are not directly within the purview of this research. Patient data (e.g., outcomes) will be collected via self-  
 1226 report measures. All participants must review a written *informed consent* and will have numerous opportunities to  
 1227 ask study personnel questions or share concerns regarding study participation and procedures. The individuals listed  
 1228 above will oversee the following monitoring and risk management plan:

1229 Data safety and monitoring will be a routine agenda item at month Advisory Board meetings. In addition to  
 1230 immediate report to the PIs, any *adverse event* will be reviewed at this meeting. An adverse event is defined as both  
 1231 an expected side effect that is of a serious nature, or an unexpected side effect/event regardless of severity. All  
 1232 events will be graded as to their attribution (unrelated to protocol, or possibly, probably, or definitely related to  
 1233 protocol and level of severity). Any event that is reported to the PI by a participant or study personnel and which  
 1234 meets these criteria will be documented as such. Reports of adverse events will include a description of the event,  
 1235 when and how it was reported, as well as any official chart records or documentation to corroborate the event or the  
 1236 reporting of the event. All adverse events will also be summarized annually and submitted to the UMass IRB.  
 1237 Adverse event reports and annual summaries will not include participant-identifiable material. The PIs will include a  
 1238 summary of safety review results (including adverse events) in the progress reports submitted to the UMass IRB and  
 1239 PCORI. PCORI will receive more frequent progress reports, yet the *annual IRB reports will address*: (1) whether  
 1240 adverse event rates are consistent with pre-study assumptions; (2) reason for dropouts from the study; (3) whether all  
 1241 participants met entry criteria; (4) whether continuation of the study is justified on the basis that additional data are  
 1242 needed to accomplish the stated aims of the study; and (5) conditions whereby the study might be terminated  
 1243 prematurely.

1244 Patients will have regular contact with their therapists. In cases where there is an acute deterioration or  
 1245 imminent risk of suicide, therapists (with assistance from the PBC administrators) will take the necessary  
 1246 course of clinical action and the study protocol will become secondary. Based on the assessment of the therapist  
 1247 and/or PBC administrator, if the patient is deemed to require a higher level of care, this will be arranged. Given  
 1248 that the treatments will not be manipulated, existing PBC procedures will be followed. Study related  
 1249 responsibilities (e.g., self-report assessments) would, of course, cease for the patient. PBC has medical  
 1250 professionals on staff who manage patient safety locally. PBC has extensive safety precautions in place for patient  
 1251 safety in general as well as risks to confidentiality.

1252 There is a chance that some participants might find the psychological assessments to be distressing, yet this risk  
 1253 is considered to be minimal. Patients will be asked questions related to their symptoms, functioning, and perceptions  
 1254 of the treatment, yet this content is not different from what would be shared in treatment and their information will  
 1255 also remain confidential. Therapists will regularly review crisis procedures with patients. That is, the patient will  
 1256 be informed to go directly to the emergency room or call 911 in the event of needing emergent psychiatric or  
 1257 medical care. Less serious study related issues (e.g., difficulty completing self-reports) will be reported to the  
 1258 project coordinator who will address these issues as appropriate and report them to the Co-PIs. If any issues  
 1259 cannot be readily addressed, they will be brought to the Advisory Board for consensual resolution.

1260 Most self-report data (therapist and patient) will be collected via a secure, password-protected web-based  
 1261 platform. All self-report responses will be linked by this password. Identifiable information will not be collected  
 1262 during web-based assessments. Only dedicated study personnel (e.g., the PIs) will have password-protected access  
 1263 to the online database, which includes only study code to link data. No identifiable information will be used in  
 1264 publications or presentations. *Audio recordings*. Exit interviews will be digitally recorded and archived for  
 1265 subsequent analysis. Such recordings are considered identifiable information even when linked by study code alone.  
 1266 Recording equipment and software will be handled by dedicated study personnel. Upon completion of a recording,  
 1267 these data will be transferred to a digital storage system. The system will be user study code and password protected,  
 1268 with state-of-the-art web security. Research personnel who are responsible for coding of recorded data will have  
 1269 mandatory ethics training in human subjects' research, data management, and HIPAA. These coders will be  
 1270 essentially independent evaluators who will not have access to other therapist or patient data. As noted, the  
 1271 recordings themselves will not be labeled with any identifiable information. The PIs will routinely monitor the  
 1272 collection and analysis of recorded data. *Database protection*. As noted, the web-based data storage system is  
 1273 password protected and information is linked by study code. When data are ultimately exported to a statistical  
 1274 software package for analysis, only the study code will link the data. The data files used for statistical analysis will  
 1275 be password protected any physical storage (e.g., a flash drive) will be kept in a locked office.

1276 **The DSMB** will meet a minimum of 6 times (every 6 months) to review the data collected thus far  
 1277 completeness and accuracy, as well as protocol compliance. The DSMB will also review (a) risk management  
 1278 protocols, as well as any modifications to the protocols; (b) procedures for maintaining confidentiality, data

1279 collection, and analyses, (c) progress toward meeting recruitment and enrollment goals, (d) if applicable,  
1280 deciding whether or not individual patients should be removed from the study protocol, (e) recommending  
1281 continuation, discontinuation, modification, or termination of the study based on evaluation of risk/benefit  
1282 ratio. DSMB reviews (e.g., assessment results, recommendations) will be summarized in written reports that will be  
1283 sent to PCORI.  
1284  
1285  
1286  
1287

1288

### CONSORTIUM CONTRACTUAL ARRANGEMENTS

1289 **Describe the proposed research projects that will be performed by subcontracted organizations. Explain the**  
 1290 **strengths that these partners bring to the overall project.**

1291

1292 **Dr. Constantino (PI; prime contract)** has extensive experience and expertise in the research methods that will

1293 be employed in the proposed research. He is an expert on psychotherapy process-outcome research, community-

1294 based participatory research methods, and measurement-based care in routine treatment settings. Specifically, he has

1295 expertise in overseeing RCTs, engaging in multi-site research, statistical methods, diagnostic assessment, qualitative

1296 methods, community-based research, collaborating with a DSMB, and providing direct clinical care as a licensed

1297 clinical psychologist in MA. As the PI and prime organization, respectively, Dr. Constantino and UMass will play

1298 the most integral and substantive roles in the proposed research. Dr. Constantino will oversee the entire study and is

1299 co-responsible for the scientific design. More specifically, he will lead the entire research team and organize its

1300 deliberations, write and manage the IRB and research protocols, directly supervise the project coordinator and all

1301 UMass graduate (paid) and undergraduate (volunteer or credit-based) research assistants, co-develop the patient and

1302 stakeholder exit interview, co-train the qualitative analysis team, oversee participant/patient recruitment, co-create

1303 the algorithm for the randomization procedure, oversee data management, engage in appropriate consultations

1304 (including assisting with statistical analyses), manage the prime (UMass) budget and co-manage the subcontracts (to

1305 ensure that all activities conform to PCORI policies and standards), convene and participate in Advisory Board

1306 meetings and keep meeting minutes, write regular progress reports to PCORI (and participate in conference calls

1307 with contract officers); liaise with community groups who are invested in the project and its results (e.g., ongoing

1308 connections and dissemination with patient advocate groups), and assist in the dissemination of project findings

1309 through publications in peer-reviewed journals, presentations at scientific conferences, presentations to patient

1310 advocate group meetings, and publications in advocate newsletters/blogs. Dr. Constantino's organization/institution,

1311 the **University of Massachusetts Amherst (UMass)**, is well resourced and situated to perform the proposed

1312 research. **LABORATORY:** Dr. Constantino has at his disposal a dedicated Psychotherapy Research Laboratory in

1313 the Department of Psychological and Brain Sciences (PBS) at UMass. PBS is housed in Tobin Hall at 135 Hicks

1314 Way, Amherst, MA. The lab includes 3 rooms, the main one of which is located in the Psychological Services

1315 Center (PSC). This room is an ideal operations center for conducting psychotherapy research given its proximity to

1316 the adjacent PSC therapy rooms where participants receive their services. The room is equipped with a dedicated

1317 phone line, a digital voicemail service, locking file cabinets for secure storage of paper files and digital media, and

1318 multiple work stations for a project coordinator and research assistants. The other 2 lab rooms, which are located

1319 outside of the PSC, but in Tobin Hall, provide additional workstations for research assistants for data entry, coding,

1320 transcription, and other lab tasks. The PSC also has two conference rooms that can be reserved for regular lab

1321 meetings, web conferencing, etc. **COMPUTERS:** The main lab room is equipped with 3 Windows-based desktop

1322 PCs, digital transcription equipment, and a laser printer. One of the other lab rooms is equipped with 2 Mac-based

1323 computers, two workstations, and a scanner/copier/printer inkjet. The third lab room is equipped with 1 Mac-based

1324 computer, 1 workstation, and copious files cabinets for storage. All computers are networked together, connected to

1325 the Internet via Ethernet, and set up with necessary software (e.g., Microsoft Office, Adobe Acrobat, SPSS, etc.).

1326 Electronic data are backed up on a dedicated secure cloud server (Box) through the University Server. **OFFICE:**

1327 The PI's office is also located in Tobin Hall, which makes it convenient to supervise the research staff. The office is

1328 equipped with a phone line, a digital voicemail service, locking file cabinets for secure storage of paper files and

1329 digital media, and a MacBook Air laptop computer with an external second monitor. The computer is networked

1330 with a high-speed laser printer, and electronic are data are backed up on a secure cloud server. **OTHER:** Full-time

1331 technical support is provided both by the UMass Office of Information Technology, as well as the PBS's electronics

1332 shop. Faculty members are supported for their research through the Office of Grants and Contracts and for their

1333 teaching through the Center for Teaching and Faculty Development. PBS is equipped with a large number of

1334 software and hardware resources and the building provides ample space for the PI's research operations.

1335 Administrative support is provided by the PBS in the form of two full-time bookkeepers, a building manager, a shop

1336 staff, a Human Subjects manager, etc. Necessary books and journals are available at UMass's W. E. B. Dubois

1337 Library. UMass faculty members also have full access to a library consortium through the Five College Network

1338 (UMass, Amherst College, Mt. Holyoke College, Hampshire College, & Smith College). The PI and his research

1339 staff also have full-text access to PsychINFO, PubMed, and other relevant databases.

1340

1341 **Dr. Boswell (Co-PI; subcontract)** has experience and expertise in the research methods that will be employed

1342 in the proposed research. He is an expert on psychotherapy process-outcome research, community-based research,

1343 and measurement-based care in routine treatment settings. Specifically, he has expertise in statistical methods,

1344 diagnostic assessment and outcome monitoring, and qualitative methods. Dr. Boswell is considered an expert on  
 1345 performance measurement in psychotherapy; he has significant experience in the development and sustainability of  
 1346 PRNs, and he has conducted rigorous clinical research using experimental designs in routine mental health settings.  
 1347 Dr. Boswell's organization/institution, the **University at Albany, SUNY**, is well resourced and situated to perform  
 1348 the proposed research. SUNY's Research Foundation is committed to the successful conduct and completion of  
 1349 sponsored programs. It is well resourced and staffed, with dedicated support for Dr. Boswell and his academic  
 1350 department. Dr. Boswell has a private office and multiple rooms of dedicated lab space in the department of  
 1351 psychology. In addition, he has research and office space in the SUNY Psychological Services Center (PSC), a  
 1352 CMHC/training site located in downtown Albany, NY. In both settings, Dr. Boswell has access to computers, word  
 1353 processing and computer software, and administrative support. He also has access to departmental and center fax  
 1354 machines, copiers, and voicemail. In addition to conducting mental health treatment research, Dr. Boswell is a  
 1355 licensed clinical psychologist in Massachusetts and New York who sees patients and supervises doctoral students.  
 1356 Dr. Boswell currently directs a research lab at SUNY Albany. He works closely with graduate students and  
 1357 undergraduate research assistants in the development and implementation of his research. The Psychology  
 1358 Department and SUNY Albany are committed to Dr. Boswell's research program and his conduct of collaborative  
 1359 research. They have provided him with institutional start up funds, as well as allow for course reductions and  
 1360 summer salary for sponsored research activities. Dr. Boswell and SUNY Albany are well-situated and partnered  
 1361 with patient and stakeholder advocate groups. The Capital District is home to several large, well-connected  
 1362 advocacy groups (e.g., NAMI, Mental Health Empowerment Exchange) that frequently collaborate with the  
 1363 department of psychology and the schools of public health and social welfare, as well as similar groups in Western  
 1364 Massachusetts. All of these partners will figure prominently in this project's dissemination and implementation plan.  
 1365 Given these strengths and resources, Dr. Boswell and SUNY will play an important role in the proposed research.  
 1366 Specifically, Dr. Boswell will **(a)** oversee study implementation (e.g., IRB, recruitment, etc.); **(b)** assist in the  
 1367 management of the primary study database; **(c)** co-train and supervise research assistants; **(d)** co-supervise  
 1368 qualitative coding (including auditing); **(e)** oversee this subcontract budget and activities to ensure that all activities  
 1369 conform to PCORI policies and standards; **(f)** participate in Advisory Board meetings and assist in the writing of  
 1370 meeting reports, as well as regular progress reports to PCORI (and participate in conference calls with contract  
 1371 officers); **(g)** liaison community groups who are invested in the project and its results (e.g., ongoing connections and  
 1372 dissemination with patient advocate groups); **(h)** assist in the conduct of the primary and secondary statistical  
 1373 analyses; **(i)** assist in the dissemination of project findings through publications in peer-reviewed journals,  
 1374 presentations at scientific conferences, and activities noted in (g) above.

1375  
 1376 **Dr. Kraus (Co-PI; subcontract) and Outcome Referrals, Inc. (ORI)** will develop and manage the TOP data  
 1377 collection and scoring systems (and for other measurement tools as needed), as well as create, deploy, and refine the  
 1378 computerized matching algorithms and interfaces that PBC will utilize in the RCT. Dr. Kraus has more than 20  
 1379 years experience developing and operating similar systems for small- and large-scale projects (e.g., entire Medicaid  
 1380 departments, state-wide provider networks, and commercial health plans). Dr. Kraus will lead the direct-to-  
 1381 consumer (and direct-to-provider) dissemination of the project findings, and will assist in the publication and  
 1382 presentations of the findings at conferences and peer-reviewed journals. **COMPUTERS:** ORI has dual networks of  
 1383 24/7 data collection servers co-located at Tier 1 internet facilities running Oracle databases and Java-driven  
 1384 proprietary code. ORI also has two high-speed scanners, and more than 30 desktop computers with Windows Office  
 1385 and several with SPSS and other statistical software. **OFFICES:** ORI offices (6,000 square feet) will host the in-  
 1386 person Advisory Board meetings in one of our three conferences rooms, one of which has a large display screen and  
 1387 video conferencing capabilities.

1388  
 1389 **Mr. Sykes (Co-PI; Subcontract) and Psychological and Behavioral Health Consultants (PBC)** will (a)  
 1390 develop standard work to incorporate study protocols (e.g., recruitment and assessment) into routine care at PBC; (b)  
 1391 oversee all PBC employees (therapists, front office staff, research support personnel) involved in the randomization  
 1392 of patients into experimental condition; (c) oversee training of triage clinicians to the standards required as part of  
 1393 the study; (d) act as liaison with appropriate PBC personnel as necessary to facilitate the study; (e) provide clinical  
 1394 oversight to ensure that patients' rights and needs are protected; and (f) assist in the dissemination of project  
 1395 findings through publications in peer-reviewed journals, presentations at scientific conferences, and through  
 1396 professional and political venues. Mr. Sykes has been providing clinical services to children, adolescents, adults and  
 1397 families for more than 30 years. His experience includes clinical positions at the Cleveland Clinic and Glenbeigh  
 1398 Hospital, and senior executive positions at Willow Creek Hospital, Windsor Hospital and Laurelwood Hospital.  
 1399 Currently, he is the Managing Director of Psychological and Behavioral Health Consultants. PBC is a team of 12



1400 psychiatrists, 10 advanced practice nurses, and 100 psychologists, clinical counselors and social workers serving  
 1401 children, adolescents, adults and families in locations throughout Ohio and northern Kentucky. PBC's experienced  
 1402 specialists provide therapy and treatment for a wide range of mental health issues. Their mission is to inspire and  
 1403 empower the patients, staff and clinicians of PBC and the communities they serve. PBC strives to be the community  
 1404 leader in behavioral outcomes, patient and staff experience, and education. Mr. Syke's specialization is in the  
 1405 treatment of adolescents and young adults. He has authored more than a dozen professional publications, presented  
 1406 more than 100 times throughout the country, and has been recognized in *Who's Who Among Human Service*  
 1407 *Professionals and Who's Who in the World*.

#### 1408 REFERENCES CITED

1409  
 1410 **Following scholarly citation practice, list the source material cited in this Research Plan.**

- 1411  
 1412 <sup>1</sup> Institute of Medicine (2006). *Improving the quality of health care for mental and substance-use conditions:*  
 1413 *Committee on crossing the quality chasm*. Washington, D.C.: National Academies Press.
- 1414 <sup>2</sup> Michaud, C. M., Murray, C. J. L., & Bloom, B. R. (2001). Burden of disease: Implications for future research.  
 1415 *Journal of the American Medical Association, 285*, 535–539.
- 1416 <sup>3</sup> Murray, C. J. L., & Lopez, A. D. (1996). The global burden of disease in 1990: Final results and their sensitivity to  
 1417 alternative epidemiological perspectives, discount rates, age-weights and disability weights. In C. J. L. Murray  
 1418 & A. D. Lopez (Eds.), *The global burden of disease: A comprehensive assessment of mortality and disability*  
 1419 *from diseases, injuries, and risk factors in 1990 and projected to 2020* (pp. 274–293). Cambridge, MA: The  
 1420 Harvard School of Public Health on behalf of the World Health Organization and the World Bank.
- 1421 <sup>4</sup> Katon, W. (2003). Clinical and health services relationships between major depression, depressive symptoms, and  
 1422 general medical illness. *Biological Psychiatry, 54*, 216–226.
- 1423 <sup>5</sup> Mertens, J. R., Lu, Y. W., Parthasarathy, S., Moore, C., & Weisner, C. M. (2003). Medical and psychiatric  
 1424 conditions of alcohol and drug treatment patients in an HMO: Comparison with matched controls. *Archives of*  
 1425 *Internal Medicine, 163*, 2511–2517.
- 1426 <sup>6</sup> Thorpe, K. E., Florence, C. S., & Joski, P. (2004). Which medical conditions account for the rise in health care  
 1427 spending? *Health Affairs, W4*, 437–445.
- 1428 <sup>7</sup> Loeppke, R., Taitel, M., Haufle, V., Parry, T., Kessler, R. C., & Jinnett, K. (2009). Health and productivity as a  
 1429 business strategy: A multiemployer study. *Journal of Occupational and Environmental Medicine, 51*, 411–428.
- 1430 <sup>8</sup> Mark, T. L., Levit, K. R., Coffey, R. M., McKusick, D. R., Harwood, H. J., King, E. C., ... Ryan, K. (2007).  
 1431 *National Expenditures for Mental Health Services and Substance Abuse Treatment, 1993–2003* (SAMHSA  
 1432 Publication No. SMA 07-4227). Rockville, MD: Substance Abuse and Mental Health Services Administration.
- 1433 <sup>9</sup> Colton, C. W., & Manderscheid, R. W. (2006). Congruencies in increased mortality rates, years of potential life  
 1434 lost, and causes of death among public mental health clients in eight states. *Prevention of Chronic Disease, 3*,  
 1435 A42.
- 1436 <sup>10</sup> Felker, B., Yazel, J. J., & Short, D. (1996). Mortality and medical comorbidity among psychiatric patients. A  
 1437 review. *Psychiatric Services, 47*, 1356–1363.
- 1438 <sup>11</sup> Kessler, R. C., Greenberg, P. E., Mickelson, K. D., Meneades, L. M., & Wang, P. S. (2001). The effects of  
 1439 chronic medical conditions on work loss and work cutback. *Journal of Occupational and Environmental*  
 1440 *Medicine, 43*, 218–225.
- 1441 <sup>12</sup> Burton, W. N., Pransky, G., Conti, D. J., Chen, C.-Y., & Edington, D. W. (2004). The association of medical  
 1442 conditions and presenteeism. *Journal of Occupational and Environmental Medicine, 46*, S38–S45.
- 1443 <sup>13</sup> Goetzel, R. Z., Ozminkowski, R. J., Sederer, L. I., & Mark, T. L. (2002). The business case for quality mental  
 1444 health services: Why employers should care about the mental health and well-being of their employees. *Journal*  
 1445 *of Occupational and Environmental Medicine, 44*, 320–330.
- 1446 <sup>14</sup> Kessler, R. C., Berglund, P., Demler, O., Jin, R., Merikangas, K. R., & Walters, E. E. (2005). Lifetime prevalence  
 1447 and age-of-onset distributions of DSM-IV disorders in the National Comorbidity Survey Replication. *Archives*  
 1448 *of General Psychiatry, 62*, 593–602.
- 1449 <sup>15</sup> Barlow, D. H. (2002). *Anxiety and its disorders: The nature and treatment of anxiety and panic* (2nd ed). New  
 1450 York, NY: Guilford Press.
- 1451 <sup>16</sup> Lambert, M. J. (2010). *Prevention of treatment failure: The use of measuring, monitoring, and feedback in*  
 1452 *clinical practice*. Washington, DC: American Psychological Association Press.
- 1453 <sup>17</sup> Kraus, D. R., Castonguay, L. G., Boswell, J. F., Nordberg, S. S., & Hayes, J. A. (2011). Therapist effectiveness:  
 1454 Implications for accountability and patient care. *Psychotherapy Research, 21*, 267–276.

- 1455 <sup>18</sup> Lambert, M. J. (2013). The efficacy and effectiveness of psychotherapy. In M. J. Lambert (Ed.), Bergin &  
 1456 Garfield's handbook of psychotherapy and behavior change (6th Ed., pp. 169-218). New York, NY: Wiley.
- 1457 <sup>19</sup> Lilienfeld, S. O. (2007). Psychological treatments that cause harm. *Perspectives on Psychological Science*, 2, 53–  
 1458 70.
- 1459 <sup>20</sup> Moos, R. (2005). Iatrogenic effects of psychosocial interventions for substance use disorders: Prevalence,  
 1460 predictors, prevention. *Addiction*, 100, 595–604.
- 1461 <sup>21</sup> Baldwin, S. A., & Imel, Z. E. (2013). Therapist effects: Findings and methods. In M.J. Lambert (Ed.), *Bergin and*  
 1462 *Garfield's handbook of psychotherapy and behavior change* (pp. 258–297). New York, NY: Wiley.
- 1463 <sup>22</sup> Boswell, J. F., Gallagher, M. W., Sauer-Zavala, S. E., Bullis, J., Gorman, J. M., Shear, M. K., ... Barlow, D. H.  
 1464 (2013). Patient characteristics and variability in adherence and competence in cognitive-behavioral therapy for  
 1465 panic disorder. *Journal of Consulting and Clinical Psychology*, 81, 443-454.
- 1466 <sup>23</sup> Westra, H. A., Constantino, M. J., Arkowitz, H., & Dozois, D. J. A. (2011). Therapist differences in cognitive-  
 1467 behavioral psychotherapy for generalized anxiety disorder: A pilot study. *Psychotherapy*, 48, 283–292.
- 1468 <sup>24</sup> Krause, M. S., Lutz, W., & Saunders, S. M. (2007). Empirically certified treatments or therapists: The issue of  
 1469 separability. *Psychotherapy*, 44, 347–353.
- 1470 <sup>25</sup> Wampold, B. E., & Imel, Z. E. (2015). *The great psychotherapy debate: The evidence for what makes*  
 1471 *psychotherapy work (2nd ed.)*. New York, NY, US: Routledge/Taylor & Francis Group.
- 1472 <sup>26</sup> Kraus, D. R., Alexander, P., Bentley, J., Boswell, J. F., Constantino, M. J., Baxter, L. (2015). *Predicting*  
 1473 *therapist effectiveness*. Manuscript in preparation.
- 1474 <sup>27</sup> Boswell, J.F., Constantino, M.J., Kraus, D.R., Bugatti, M., & Oswald, J. (2015). The expanding relevance of  
 1475 routinely collected outcome data for mental health care decision making. *Administration and Policy in Mental*  
 1476 *Health and Mental Health Services Research*. DOI 10.1007/s10488-015-0649-6
- 1477 <sup>28</sup> Constantino, M. J., Boswell, J. F., Bernecker, S. L., & Castonguay, L. G. (2013). Context-responsive  
 1478 integration as a framework for unified psychotherapy and clinical science: Conceptual and empirical  
 1479 considerations. *Journal of Unified Psychotherapy and Clinical Science*, 2, 1–20.
- 1480 <sup>29</sup> Kohn, R., Saxena, S., Levav, I., & Saraceno, B. (2004). The treatment gap in mental health care. *Bulletin of the*  
 1481 *World Health Organization*, 82, 858–866.
- 1482 <sup>30</sup> Kraus, D. R., Seligman, D., & Jordan, J. R., (2005). Validation of a behavioral health treatment outcome and  
 1483 assessment tool designed for naturalistic settings: The Treatment Outcome Package. *Journal of Clinical*  
 1484 *Psychology*, 61, 285–314.
- 1485 <sup>31</sup> Ketelaar, N. A. B. M., Faber, M. J., Flottorp, S., Rygh, L. H., Deane, K. H. O., & Eccles, M. P. (2011). Public  
 1486 release of performance data in changing the behaviour of healthcare consumers, professionals or organisations.  
 1487 *Cochrane Database of Systematic Reviews*, Issue 11. Art. No.: CD004538.
- 1488 <sup>32</sup> Henderson, A., & Henderson, S. (2010). Provision of a surgeon's performance data for people considering  
 1489 elective surgery. *Cochrane Database of Systematic Reviews*, Issue 11. Art. No.: CD006327.
- 1490 <sup>33</sup> Tu, J. V., Donovan, L. R., Douglas, S. L., Wang, J. T., Austin, P. C., & Alter, D. A. (2009). Effectiveness of  
 1491 public report cards for improving the quality of cardiac care: The EFFECT study: A randomized trial. *JAMA*,  
 1492 302, 2330–2337.
- 1493 <sup>34</sup> Farley, D. O., Elliott, M. N., Short, P. F., Damiano, P., Kanouse, D. E., & Hays, R. D. (2002). Effect of CAPHS  
 1494 performance information on health plan choices by Iowa Medicaid. *Medical Care Research and Review*, 59,  
 1495 319–336.
- 1496 <sup>35</sup> Hibbard, J. H., Peters, E., Slovic, P., Finucane, M. L., & Tusler, M. (2001). Making health care quality reports  
 1497 easier to use. *Joint Commission Journal on Quality Improvement*, 27, 591–604.
- 1498 <sup>36</sup> Adams, J. R., & Drake, R. E. (2006). Shared decision-making and evidence-based practice. *Community Mental*  
 1499 *Health Journal*, 42, 87–105.
- 1500 <sup>37</sup> Walton, M. (2007). Public reports: Putting patients in the picture requires a new relationship between doctors  
 1501 and patients. In S. Clarke & J. Oakley (Eds.), *Informed consent and clinician accountability: The ethics of*  
 1502 *report cards on surgeon performance* (pp. 65–75). Cambridge, UK: Cambridge University Press.
- 1503 <sup>38</sup> Selby, J. V. (February 11, 2015). Untitled. *The PCORI Digest: A Monthly Report from the Patient-Centered*  
 1504 *Outcomes Research Institute*. Retrieved from [http://campaign.r20.constantcontact.com/render?ca=b22d7235-](http://campaign.r20.constantcontact.com/render?ca=b22d7235-f80f-45dd-8085-48513d663cef&c=9e561b40-b4cf-11e3-b58c-d4ae52a45a09&ch=9f60ad70-b4cf-11e3-b5a1-d4ae52a45a09)  
 1505 [f80f-45dd-8085-48513d663cef&c=9e561b40-b4cf-11e3-b58c-d4ae52a45a09&ch=9f60ad70-b4cf-11e3-b5a1-](http://campaign.r20.constantcontact.com/render?ca=b22d7235-f80f-45dd-8085-48513d663cef&c=9e561b40-b4cf-11e3-b58c-d4ae52a45a09&ch=9f60ad70-b4cf-11e3-b5a1-d4ae52a45a09)  
 1506 [d4ae52a45a09](http://campaign.r20.constantcontact.com/render?ca=b22d7235-f80f-45dd-8085-48513d663cef&c=9e561b40-b4cf-11e3-b58c-d4ae52a45a09&ch=9f60ad70-b4cf-11e3-b5a1-d4ae52a45a09)
- 1507 <sup>39</sup> Lambert, M. J. (Ed.). (2013). *Bergin & Garfield's handbook of psychotherapy and behavior change* (6th ed.).  
 1508 New York, NY: Wiley.
- 1509 <sup>40</sup> Okiishi, J., Lambert, M. J., Nielsen, S. L., & Ogles, B.M. (2003). Waiting for supershrink: An empirical analysis  
 1510 of therapist effects. *Clinical Psychology and Psychotherapy*, 10, 361–373.

- 1511 <sup>41</sup> Boswell, J. F., Kraus, D. R., Miller, S., & Lambert, M. J. (in press). Implementing routine outcome assessment in  
1512 clinical practice: Benefits, challenges, and solutions. *Psychotherapy Research*. Advance online publication.
- 1513 <sup>42</sup> Wampold, B. E., & Brown, G. S. (2005). Estimating variability in outcomes attributable to therapists: A  
1514 naturalistic study of outcomes in managed care. *Journal of Consulting and Clinical Psychology, 73*, 914–923.
- 1515 <sup>43</sup> Howard, K. I., Moras, K., Brill, P. L., Martinovich, Z., & Lutz, W. (1986). Evaluation of psychotherapy.  
1516 *American Psychologist, 51*, 1059–1064.
- 1517 <sup>44</sup> Edwards, A., & Elwyn, G. (2009). *Shared decision-making in health care: Achieving evidence-based patient*  
1518 *choice* (2nd ed.). New York, NY: Oxford University Press.
- 1519 <sup>45</sup> Castonguay, L. G., Constantino, M. J., Boswell, J. F., & Kraus, D. R. (2010). The therapeutic alliance:  
1520 Research and theory. In L. M. Horowitz & S. Strack (Eds.), *Handbook of interpersonal psychology: Theory,*  
1521 *research, assessment, and therapeutic interventions* (pp. 509-518). Hoboken, NJ: John Wiley and Sons, Inc.
- 1522 <sup>46</sup> Constantino, M. J., Arnkoff, D. B., Glass, C. R., Ametrano, R. M., & Smith, J. Z. (2011). Expectations. *Journal of*  
1523 *Clinical Psychology: In Session, 67*, 184-192. doi:10.1002/jclp.20754
- 1524 <sup>47</sup> Lambert, M. J. (2011). What have we learned about treatment failure in empirically supported treatments: Some  
1525 suggestions for practice. *Cognitive & Behavioral Practice, 18*, 413–420.
- 1526 <sup>48</sup> American Psychiatric Association. (2013). *Diagnostic and statistical manual of mental disorders* (5th ed.).  
1527 Arlington, VA: American Psychiatric Publishing.
- 1528 <sup>49</sup> Raudenbush, S.W., & Liu, X. (2001). Effects of study duration, frequency of observation, and sample size on  
1529 power in studies of group differences in polynomial change. *Psychological Methods, 6*, 387-401.
- 1530 <sup>50</sup> Sheehan, D. V., Lecrubier, Y., Sheehan, K. H., Amorim, P., Janavs, J., Weiller, E., Hergueta, T., ... Dunbar, G. C.  
1531 (1998). The Mini-International Neuropsychiatric Interview (M.I.N.I.): the development and validation of a  
1532 structured diagnostic psychiatric interview for DSM-IV and ICD-10. *Journal of Clinical Psychiatry, 59*, 22–33.
- 1533 <sup>51</sup> Lutz, W., Lowry, J., Kopta, S. M., Einstein, D. A., & Howard, K. I. (2001). Prediction of dose–response relations  
1534 based on patient characteristics. *Journal of Clinical Psychology, 57*, 889–900.
- 1535 <sup>52</sup> Lambert, M. J., Whipple, J. L., Smart, D. W., Vermeersch, D. A., Nielsen, S. L., & Hawkins, E. J. (2001). The  
1536 effects of providing therapists with feedback on patient progress during psychotherapy: Are outcomes  
1537 enhanced? *Psychotherapy Research, 11*, 49–68.
- 1538 <sup>53</sup> World Health Organization. (2008). ICD-10: International statistical classification of diseases and related health  
1539 problems (Rev. 10th ed.). New York, NY: Author.
- 1540 <sup>54</sup> First, M. B., Spitzer, R. L., Gibbon, M., & Williams, J. B. W. (1996). *Structured Clinical Interview for DSM-IV*  
1541 *Axis I Disorders, Clinician Version (SCID-CV)*. Washington, DC: American Psychiatric Press.
- 1542 <sup>55</sup> First, M. B., Gibbon, M., Spitzer, R. L., Williams, J. B. W., & Benjamin, L. S. (1997). *Structured Clinical*  
1543 *Interview for DSM-IV Axis II Personality Disorders (SCID-II)*. Washington, DC: American Psychiatric Press.
- 1544 <sup>56</sup> Guy, W. (1976; Ed.). *ECDEU Assessment Manual for Psychopharmacology*. Rockville, MD: US Department of  
1545 Health, Education, and Welfare Public Health Service Alcohol, Drug Abuse, and Mental Health Administration
- 1546 <sup>57</sup> Boswell, J.F., Kraus, D.R., Nordberg, S., & Castonguay, L.G., (2009, June). *The Treatment Outcome Package*  
1547 *(TOP): An investigation of its validity*. Poster presented at the annual meeting of the Society for Psychotherapy  
1548 Research, Santiago, Chile.
- 1549 <sup>58</sup> Beck, A.T., Steer, R. A., & Brown, G. K. (1996). *Manual for the Beck Depression Inventory-II*. San Antonio, TX:  
1550 Psychological Corporation.
- 1551 <sup>59</sup> Derogatis, L. R. (1975). *Brief Symptom Inventory*. Baltimore: Clinical Psychometrics Research.
- 1552 <sup>60</sup> Jacobson, N. S., & Truax, P. (1991). Clinical significance: A statistical approach to defining meaningful change in  
1553 psychotherapy research. *Journal of Consulting and Clinical Psychology, 59*, 12–19.
- 1554 <sup>61</sup> Rosen, C., Drescher, K. D., Moos, R. H., & Gusman, F. (1999). Six- and ten-item indices of psychological distress  
1555 based on the Symptom Checklist-90. *Assessment, 7*, 103-111.
- 1556 <sup>62</sup> Tracey, T. J., & Kokotovic, A. M. (1989). Factor structure of the Working Alliance Inventory. *Psychological*  
1557 *Assessment, 1*, 207–210.
- 1558 <sup>63</sup> Devilly, G. J., & Borkovec, T. D. (2000). Psychometric properties of the credibility/expectancy questionnaire.  
1559 *Journal of Behavior Therapy and Experimental Psychiatry, 31*(2), 73–86.
- 1560 <sup>64</sup> Raudenbush, S. W., & Bryk, A. S. (2002). *Hierarchical linear models: Applications and data analysis methods*  
1561 (2nd ed.). Thousand Oaks, CA: Sage.
- 1562 <sup>65</sup> Rubin, D.B. (1987). *Multiple imputation for nonresponse in surveys*. New York: Wiley & Sons.
- 1563 <sup>66</sup> Schafer, J.L., & Yucel, R.M. (2002). Computational strategies for multivariate linear mixed-effects models with  
1564 missing values. *Journal of Computational and Graphical Statistics, 11*, 437-457.
- 1565 <sup>67</sup> Yucel, R.M. (2008). Multiple imputation inference for multivariate multilevel continuous data with ignorable non-  
1566 response. *Philosophical Transactions of the Royal Society, 366*, 2389-2403.

- 1567 <sup>68</sup>Little, R.J., & Wang, Y. (1996). Pattern-mixture models for multivariate incomplete data with covariates.  
1568 *Biometrics*, 52, 98-111.
- 1569 <sup>69</sup>Hedeker D., & Gibbons, R.D. (1997). Application of random-effects pattern-mixture models for missing data in  
1570 longitudinal studies. *Psychological methods*, 2, 64-78.
- 1571 <sup>70</sup>Glaser, B. G., & Strauss, A. (1967). *The discovery of grounded theory: Strategies for qualitative research*.  
1572 Chicago, IL: Aldine.
- 1573 <sup>71</sup>Hill, C. (Ed.). (2012). *Consensual qualitative research: A practical resource for investigating social science*  
1574 *phenomena*. Washington, DC: American Psychological Association.
- 1575 <sup>72</sup>Lepper, G., & Riding, N. (2006). *Researching the psychotherapy process: A practical guide to transcript based*  
1576 *methods*. London, UK: Palgrave.
- 1577 <sup>73</sup>Strauss, A., & Corbin, J. (1990). *Basics of qualitative research: Grounded theory procedures and techniques*.  
1578 Newbury Park, CA: Sage.
- 1579 <sup>74</sup>Barlow, D. H., Boswell, J. F., & Thompson-Hollands, J. (2013). Eysenck, Strupp and 50 years of psychotherapy  
1580 research: A personal perspective. *Psychotherapy*, 50, 77-87.
- 1581 <sup>75</sup>Boswell, J. F. (2013). Intervention strategies and clinical process in transdiagnostic cognitive-behavioral therapy.  
1582 *Psychotherapy*, 50, 381-386.
- 1583 <sup>76</sup>Walfish, S., McAlister, B., O'Donnell, P., & Lambert, M. J. (2012). An investigation of self-assessment bias in  
1584 mental health providers. *Psychological Reports*, 110, 639-644.
- 1585 <sup>77</sup>Constantino, M. J., Adams, M. L., Pazzaglia, A. M., Bernecker, S. L., Ravitz, P., & McBride, C. (2013). Baseline  
1586 patient characteristics as predictors of remission in interpersonal psychotherapy for depression. *Psychotherapy*  
1587 *Research*, 23, 190-200.
- 1588 <sup>78</sup>Constantino, M. J., Penek, S., Bernecker, S. L., & Overtree, C. E. (2013). A preliminary examination of  
1589 participant characteristics in relation to patients' treatment beliefs in psychotherapy in a training clinic. *Journal*  
1590 *of Psychotherapy Integration*. Advance online publication.
- 1591 <sup>79</sup>Constantino, M. J., Marnell, M., Haile, A. J., Kanther-Sista, S. N., Wolman, K., Zappert, L., & Arnow, B. A.  
1592 (2008). Integrative cognitive therapy for depression: A randomized pilot comparison [Special issue].  
1593 *Psychotherapy*, 45, 122-134.
- 1594 <sup>80</sup>Constantino, M. J., Arnow, B. A., Blasey, C., & Agras, W. S. (2005). The association between patient  
1595 characteristics and the therapeutic alliance in cognitive-behavioral and interpersonal therapy for bulimia  
1596 nervosa. *Journal of Consulting and Clinical Psychology*, 73, 203-211.
- 1597 <sup>81</sup>Constantino, M. J., Manber, R., DeGeorge, J., McBride, C., Ravitz, P., Zuroff, D., ... Arnow, B. A. (2008).  
1598 Interpersonal styles of chronically depressed outpatients: Profiles and therapeutic change. *Psychotherapy*, 45,  
1599 491-506.
- 1600 <sup>82</sup>Constantino, M. J., & Westra, H. A. (2012). An expectancy-based approach to facilitating corrective experiences  
1601 in psychotherapy. In L. G. Castonguay & C. E. Hill (Eds.), *Transformation in psychotherapy: Corrective*  
1602 *experiences across cognitive, behavioral, humanistic, and psychodynamic approaches* (pp. 121-139).  
1603 Washington, DC: American Psychological Association.
- 1604 <sup>83</sup>Constantino, M. J., Boswell, J. F., Bernecker, S. L., & Castonguay, L. G. (2013). Context-responsive integration  
1605 as a framework for unified psychotherapy and clinical science: Conceptual and empirical considerations.  
1606 *Journal of Unified Psychotherapy and Clinical Science*, 2, 1-20.
- 1607 <sup>84</sup>Castonguay, L.G., Boswell, J.F., Constantino, M.J., Goldfried, M.R., & Hill, C.E. (2010). Training implications of  
1608 harmful effects of psychological treatments. *American Psychologist*, 65, 34-49.
- 1609 <sup>85</sup>Constantino, M. J., Overtree, C. E., & Bernecker, S. L. (in press). Emerging technologies and innovations in  
1610 professional psychology training. In W. B. Johnson & N. J. Kaslow (Eds.), *Oxford handbook of education and*  
1611 *training in professional psychology*. New York, NY: Oxford University Press.
- 1612 <sup>86</sup>Constantino, M. J., Laws, H. B., Arnow, B. A., Klein, D., N., Rothbaum, B. O., & Manber, R. (2012). The relation  
1613 between changes in patients' interpersonal impact messages and outcome in treatment for chronic depression.  
1614 *Journal of Consulting and Clinical Psychology*, 80, 354-364.
- 1615 <sup>87</sup>Constantino, M. J., Morrison, N. R., MacEwan, G., & Boswell, J. F. (2013). Therapeutic alliance researchers'  
1616 perspectives on alliance-centered training practices. *Journal of Psychotherapy Integration*, 23, 284-289.
- 1617 <sup>88</sup>Boswell, J. F., Castonguay, L. G., & Wasserman, R. H. (2010). Effects of training and intervention use on session  
1618 outcome. *Journal of Consulting and Clinical Psychology*, 78, 717-723.
- 1619 <sup>89</sup>Boswell, J. F., Sauer-Zavala, S. E., Gallagher, M. W., Delgado, N. K., & Barlow, D. H. (2012). Readiness to  
1620 change as a moderator of outcome in transdiagnostic treatment. *Psychotherapy Research*, 22, 570-578.
- 1621 <sup>90</sup>Zack, S. E., Castonguay, L. G., Boswell, J. F., McLeavey, A. A., Adelman, R., & Kraus, D. (in press).  
1622 Attachment history as a moderator of the alliance outcome relationship in adolescents. *Psychotherapy*.

- 1623 <sup>91</sup> Castonguay, L.G., Boswell, J.F., Zack, S.E., Baker, S., Boutselis, M.A., Chiswick, N.R.,...Grosse Holtforth, M.  
1624 (2010). Helpful and hindering events in psychotherapy: A practice research network study. *Psychotherapy:  
1625 Theory, Research, Practice, Training*, 47, 327-344.
- 1626 <sup>92</sup> Kraus, D. R., Boswell, J. F., Wright, A. G.C., Castonguay, L. G., Pincus, A. L. (2010). Factor structure of the  
1627 Treatment Outcome Package for children. *Journal of Clinical Psychology*, 66, 627–640.
- 1628 <sup>93</sup> Kraus, D., & Wolfe, A., & Castonguay, L. G. (2006). The outcome assistant: A kinder philosophy to the  
1629 management of outcome. *Psychotherapy Bulletin*, 41, 23–31.
- 1630 <sup>94</sup> Youn, S. J, Kraus, D. R., & Castonguay, L. G. (2012). Treatment outcome package: Facilitating practice and  
1631 clinically relevant research. *Psychotherapy*, 49, 115–122.
- 1632 <sup>95</sup> Nordberg, S. S., Castonguay, L. G., Fisher, A. J., Boswell, J. F., & Kraus, D. R. (in press). Validating the rapid  
1633 responder construct within a practice-research network. *Journal of Clinical Psychology*.
- 1634 <sup>96</sup> McAleavey, A. A., Nordberg, S. S., Hayes, J. A., Castonguay, L. G., Locke, B. D., & Lockard, A. J. (2012).  
1635 Clinical validity of the Counseling Center Assessment of Psychological Symptoms-62 (CCAPS-62): Further  
1636 evaluation and clinical applications. *Journal of Counseling Psychology*, 59, 575-590.
- 1637 <sup>97</sup> McAleavey, A. A., Nordberg, S. S., Kraus, D., Castonguay, L. G., (2012). Errors in treatment outcome  
1638 monitoring: Implications of multidimensional and general measurements for real-world psychotherapy.  
1639 *Canadian Psychology*, 53, 105-114.
- 1640 <sup>98</sup> Nordberg, S. S., Eisen, S, & Burgess, J. (2014-2015) “Developing Software Tools for the PTSD Computer-  
1641 Adapted Test (P-CAT)” *Primary Investigator* on MH-QUERI grant QLP 55-041 (April, 2014 – September,  
1642 2014).
- 1643 <sup>99</sup> Moltu, C., Andersen, J.R., & Nordberg, S. (2015-2018). ROM-forskning i Psykisk Helse. (Transl.: Research on  
1644 Routine Outcome Measurement in Mental Health). Sogn og Fjordane University College, Førde, Norway.  
1645 3MILL NOK (\$530,000).
- 1646 <sup>100</sup> Moltu, C., Andersen, J.R., & Nordberg, S. (2015-2018). ROM og feedbacksystemer i aktiv og fokusert  
1647 miljøterapi. (Transl.: Routine Outcome Measurement and Feedback Systems in Active and Focused  
1648 Environmental Therapy). Sogn og Fjordane University College, Førde, Norway. 3MILL NOK. (\$530,000)
- 1649 <sup>101</sup> Nordberg, S. S., Hayes, J. A., McAleavey, A. A., Castonguay, L. G., & Locke, B.D. (2013). Treatment utilization  
1650 on college campuses: Who seeks help for what? *Journal of College Counseling*, 16, 258-274.
- 1651 <sup>102</sup> Nordberg, S.S., Burgess, J. F., Eisen, S, Green, J., Marx, B., (2014-2015) “Suicide Risk Profiling: Identifying  
1652 Self-Reported Symptom Variables that Inform Risk” *Primary Investigator* on MH-QUERI grant QLP 55-048.
- 1653 <sup>103</sup> Castonguay, L. G., Barkham, M., Lutz, W., & McAleavey, A. A. (2013). Practice-oriented research:  
1654 Approaches and application. In M. J. Lambert (Ed.). *Bergin and Garfield’s Handbook of psychotherapy and  
1655 behavior change* (6th ed., pp. 85-133). New York, NY: Wiley.  
1656  
1657  
1658

**APPENDIX (optional)****Appendix A****Targeted/Planned Enrollment Table (Therapists)**

| <b>Race</b>                   | <b>Male (N)</b> | <b>Female (N)</b> | <b>Total (N)</b> |
|-------------------------------|-----------------|-------------------|------------------|
| American Indian/Alaska Native | 0               | 0                 | 0                |
| Asian                         | 0               | 1                 | 1                |
| Black/African American        | 1               | 3                 | 4                |
| Hawaiian/Pacific Islander     | 0               | 0                 | 0                |
| White                         | 13              | 27                | 40               |
| Multirace                     | 0               | 0                 | 0                |
| <b>Ethnicity</b>              | <b>Male (N)</b> | <b>Female (N)</b> | <b>Total (N)</b> |
| Hispanic (Latino/Latina)      | 1               | 1                 | 2                |
| Non-Hispanic                  | 16              | 26                | 42               |

1659  
1660  
1661  
1662

1663  
1664

1665 **Full study protocol submitted to, and approved by, the University of Massachusetts**  
 1666 **Amherst Institutional Review Board (November 2017)**

1667  
 1668 **PROTOCOL**  
 1669 **APPLICATION FORM**  
 1670 **SOCIAL, BEHAVIORAL, AND EDUCATIONAL FULL BOARD**  
 1671 **HUMAN SUBJECTS IN SOCIAL, BEHAVIORAL, AND EDUCATIONAL**  
 1672 **RESEARCH**

1673  
 1674 **University of Massachusetts Amherst (UMass)**  
 1675 **Institutional Review Board (IRB)**  
 1676

1677 **Protocol ID:** 2016-3401

1678 **Title:** Enhancing Mental Health Care  
 1679

1680 **Revision Form**

1681 **1. Summarize the proposed changes to the protocol in lay terms (including details of ALL**  
 1682 **changes proposed AND modify all relevant protocol sections and attachments accordingly).**

1683 As recently and extensively discussed with Margaret Burggren and Gaurav Dhawan, we submit here a revised  
 1684 protocol based on a contract modification for our PCORI-funded research project. The revisions are included in all  
 1685 relevant sections of this protocol; however, for ease of review, we have also attached a Word document that tracks  
 1686 all changes (in the "Other" section of the attachments page). The title of the document is: "PCORI IRB  
 1687 Proposal\_R1\_for PsychBC\_FINAL submitted.docx"  
 1688

1689 PsychBC is our new clinical subcontractor (replacing Atrius Health). All revisions in the protocol itself, and in all  
 1690 attachment attachments, reflect this new partnership.  
 1691

1692 In the aforementioned Word document, we also note with comment bubbles when an attachment to this protocol has  
 1693 been revised, has stayed the same, or has been deleted because it is no longer relevant. Again, we hope that such use  
 1694 of tracked changes/comments is helpful to the review team. Of course, we can also answer any remaining questions.  
 1695

1696 Thank you for your time and efforts in reviewing this protocol revision.  
 1697

1698 **2. Indicate Level of Risk involved with the changes proposed.**

1699 No change.  
 1700

1701 **3. Describe any Other Changes.**

1702 None  
 1703

1704 **Protocol Director:** Michael J. Constantino

1705 **Degree:** PhD

1706 **Title:** Professor

1707 **Department Name:** Psychological & Brain Sciences

1708 **Mailing Address:** 612 Tobin Hall, 135 Hicks Way

1709 **Phone:** 5-1388; **Fax:** 5-0996

1710 **E-mail:** mconstantino@psych.umass.edu

1711 **Human Subjects Training Completed?** yes  
 1712

**Subject Populations(s) Checklist**

**Yes/No**

|                                                 |   |
|-------------------------------------------------|---|
| Minors (under 18)                               | N |
| Pregnant Women                                  | N |
| Cognitively Impaired or Decisionally Challenged | N |
| Older individuals (75 and over)                 | N |
| Healthy Volunteers                              | N |



|                                                          |   |
|----------------------------------------------------------|---|
| Students/Employees                                       | N |
| International Populations                                | N |
| Prisoners                                                | N |
| Other (i.e., any population that is not specified above) | Y |

1713  
 1714 Other: Subjects will include two mental health care stakeholder groups: (1) therapists affiliated with PsychBC who  
 1715 are providing outpatient psychotherapy, and (2) adult patients receiving psychotherapy for varied mental health  
 1716 complaints from the participating therapists. PsychBC, a formal subcontract to UMass on this project, is an  
 1717 innovative health care organization and one of the largest providers of outpatient mental healthcare services in Ohio.  
 1718 PsychBC's role on this project is restricted to providing the research team access to these two subject populations,  
 1719 and assisting the team in recruitment. Thus, PsychBC is not engaged in human subjects' research.  
 1720

**Study Location(s) Checklist** **Yes/No**

|                                       |   |
|---------------------------------------|---|
| University of Massachusetts Amherst   | Y |
| Baystate Medical                      | N |
| University Health Services            | N |
| Hartford Hospital                     | N |
| Other (Specify other Study Locations) | Y |

1721  
 1722 Other: All study operations will be coordinated through Dr. Michael Constantino's (PI) Psychotherapy Research Lab  
 1723 at UMass Amherst. Subject data will be collected through our clinical partner, PsychBC, which employs a large  
 1724 team of psychiatrists, advanced practice nurses, psychologists, clinical counselors, and social workers serving  
 1725 children, adolescents, adults, and families in locations throughout Ohio and northern Kentucky. PsychBC's  
 1726 experienced specialists provide therapy for a wide range of mental health issues. PsychBC includes multiple  
 1727 treatment sites in Ohio that will contribute to data collection.  
 1728

**General Checklist** **Yes/No**

|                                                        |   |
|--------------------------------------------------------|---|
| Training Grant?                                        | N |
| Funded Study (or proposal submitted to sponsor)?       | Y |
| Cooperating Institution(s)?                            | Y |
| Federally Sponsored Project?                           | Y |
| Human blood, cells, tissues, or body fluids (tissues)? | N |
| Subjects will be paid for participations?              | Y |

1729  
 1730 Cooperating Institution(s): (1) University at Albany, SUNY (Dr. James Boswell; Co-PI and subcontract); (2)  
 1731 Outcome Referrals Institute, Inc. (ORI; Dr. David Kraus; Co-PI and subcontract); and (3) PsychBC (Dr. Tom  
 1732 Swales; subcontract director). Note: At the time of this revision, an IAA has already been established for the  
 1733 approved original protocol with SUNY Albany and ORI. After consulting with UMass IRB staff, it is now clear that  
 1734 our new subcontract, PsychBC, is not engaged in human subjects' research; thus, no IAA is required/requested.  
 1735

**Funding Checklist**

**Grants/Contracts:**

**Funding Administered By:** UNIVERSITY

**PGCA#:** 1503-28753

**GAID#:**

**Funded By:** Patient-Centered Outcomes Research Institute

1828 L Street, NW, Suite 900

Washington, DC 20036

Phone: (202) 827-7700 | Fax: (202) 355-9558

info@pcori.org

**Principle Investigator:** Michael J. Constantino

**Grant/Contract Title:** Enhancing Mental Health Care by Scientifically Matching Patients to Providers' Strengths

1749

1750 **Are the contents of this protocol the same as described in grant/contract proposal? Y**

1751 **Is this a training grant? N**

1752 **Are any subcontracts issues under this grant? Y**

1753

1754 **Fellowships – None**

1755 **Gift Funding – None**

1756 **Dept. Funding – None**

1757 **Other Funding – None**

1758

1759 **1. Purpose of the study**

1760

1761 **a. Provide a brief lay summary of the purpose of the study.**

1762 Research has shown that mental health care (MHC) providers differ significantly in their ability to help  
1763 patients. In addition, providers demonstrate different patterns of effectiveness across symptom and  
1764 functioning domains. For example, some providers are reliably effective in treating numerous patients  
1765 and problem domains, others are reliably effective in some domains (e.g., depression, substance abuse)  
1766 yet appear to struggle in others (e.g., anxiety, social functioning), and some are reliably ineffective, or  
1767 even harmful, across patients and domains. Knowledge of these provider differences is based largely  
1768 on patient-reported outcomes collected in routine MHC settings.

1769

1770 Unfortunately, provider performance information is not systematically used to refer or assign a  
1771 particular patient to a scientifically based best-matched provider. MHC systems continue to rely on  
1772 random or purely pragmatic case assignment and referral, which significantly “waters down” the odds  
1773 of a patient being assigned/referred to a high performing provider in the patient’s area(s) of need, and  
1774 increases the risk of being assigned/referred to a provider who may have a track record of  
1775 ineffectiveness. This research aims to solve the existing non-patient-centered provider-matching  
1776 problem.

1777

1778 Specifically, we aim to demonstrate the comparative effectiveness of a scientifically-based patient-  
1779 provider match system compared to status quo pragmatic case assignment. We expect in the scientific  
1780 match group significantly better treatment outcomes (e.g., symptoms, quality of life) and higher patient  
1781 satisfaction with treatment. We also expect to demonstrate feasibility of implementing a scientific  
1782 match process in a community MHC system and broad dissemination of the easily replicated scientific  
1783 match technology in diverse health care settings. The importance of this work for patients cannot be  
1784 understated. Far too many patients struggle to find the right provider, which unnecessarily prolongs  
1785 suffering and promotes health care system inefficiency. A scientific match system based on routine  
1786 outcome data uses patient-generated information to direct this patient to this provider in this setting. In  
1787 addition, when based on multidimensional assessment, it allows a wide variety of patient-centered  
1788 outcomes to be represented (e.g., symptom domains, functioning domains, quality of life).

1789

1790 **b. What does the Investigator(s) hope to learn from the study?**

1791 The goal of this project is to test the effectiveness of an innovative, scientifically-informed patient-  
1792 therapist referral match algorithm based on MHC provider outcome data. We will employ a  
1793 randomized controlled trial (RCT) to compare the match algorithm with commonplace pragmatic  
1794 referral matching (based on provider availability, convenience, or self-reported specialty).  
1795 Psychosocial treatment will remain naturalistically administered by varied providers (e.g.,  
1796 psychologists, social workers) to patients with mental health concerns. We hypothesize that the  
1797 scientific match group will outperform the pragmatic match group in decreasing patient symptoms and  
1798 treatment dropout, and in promoting patient functional outcomes, perceived treatment credibility,  
1799 outcome expectation, and care satisfaction, as well as therapeutic alliance quality. Doing so will  
1800 establish the match algorithm as a mechanism of effective patient-centered MHC, and will suggest that  
1801 this scientifically derived patient-provider matching intervention can be integrated into MHC systems  
1802 to aid in treatment decision making, as well as increase personalization.

1803

1804 **2. Study Procedures**

1805

1806 **a. Describe all study procedures.**

1807 We will compare the efficacy of naturalistic treatment either with or without the aid of scientific  
 1808 matching to a provider with a double-blind RCT. The project will involve two main phases. First, we  
 1809 will access a naturalistic baseline assessment of consenting PsychBC therapists' performance to  
 1810 determine their relative strengths and weaknesses in treating the problem domains measured by a  
 1811 multidimensional outcome tool. This period will establish our therapist sample pool and inform the  
 1812 RCT match manipulation (a match will represent a patient being assigned to a therapist who has  
 1813 empirically demonstrated during the baseline phase that he or she is stably effective at treating patients  
 1814 with the same type of presenting complaint).

1815  
 1816 Second, and after the baseline period, new consenting outpatients will be randomly assigned to the  
 1817 match (experimental) or no match (control) condition. The PsychBC administrators and their project-  
 1818 specific coordinator will collaborate with the research team to apply the randomization protocol.  
 1819 Treatment outcome will be assessed through the patient's actual termination point or 16 weeks,  
 1820 whichever comes sooner (we will also conduct a follow-up outcome assessment at 1 year after the  
 1821 point of termination on a randomly selected subsample). Outside of being matched to a therapist from  
 1822 a short-list of providers who have demonstrated (during the phase 1 baseline) reliable success in  
 1823 treating the patient's primary problem area, and completing study-specific measures for which  
 1824 participants will receive monetary compensation, treatment will be delivered as usual (the short list  
 1825 still allows for pragmatic considerations like availability and administrator assignment options).

1826  
 1827 Additional methodological details by study phase follow.

1828  
 1829 Phase 1: The most significant revision to the research protocol is that we no longer need to  
 1830 recruit/enroll patients for phase 1. Rather, phase 1 now focuses solely on PsychBC clinicians as our  
 1831 research participants. To inform the match condition, we will first establish the baseline track record of  
 1832 participating therapists' performance (across a minimum of 15 adult psychotherapy cases each) to  
 1833 determine their strengths in treating behavioral health domains measured by the primary outcome  
 1834 measure on which the match algorithm is based – the Treatment Outcome Package (TOP; Kraus,  
 1835 Seligman, & Jordan, 2005), which is described below in the listing of relevant phase 1 attachments to  
 1836 this protocol. Developed and processed by our Co- PI (Dr. Kraus) and his subcontractor company,  
 1837 Outcome Referrals, Inc. (ORI), the TOP is administered routinely as a core element of the PsychBC  
 1838 care model. That is, PsychBC already has an executed business agreement with ORI to have their  
 1839 patients complete the TOP as part of their standard clinical routine. Thus, we can leverage  
 1840 the existing PsychBC infrastructure to support the present study with little to no extra burden on  
 1841 administrators, providers, and patients. Moreover, although patient data are part of this baseline phase,  
 1842 they are protected within the business agreement between ORI and PsychBC, and the agreement  
 1843 allows for these coded data to be used to establish therapists' performance "report cards." So, to  
 1844 reiterate, patient TOP data are collected as part of standard operating procedure for PsychBC. At this  
 1845 stage, we are not collecting these patient data as a research protocol; rather, these coded patient data  
 1846 points (i.e., clinical care data points) inform our match intervention (by establishing therapist  
 1847 performance report cards across at least 15 cases) that is at the heart of phase 2 (described below). In  
 1848 phase 1, we are only actively recruiting provider participants; thus, no patient protected health  
 1849 information (PHI) is transmitted to the research team.

1850  
 1851 Importantly, at the time of this proposed IRB revision, most PsychBC clinicians who will choose to  
 1852 participate in the study will already have baseline data on the minimum 15 adult cases (through the  
 1853 patient's actual termination point or 16 weeks, whichever comes sooner) to establish their track record.  
 1854 In these cases, we simply need to enroll the therapist in the study (as discussed next). For therapists  
 1855 who wish to participate, but have yet to accumulate baseline performance data on the minimum 15  
 1856 cases, we will track their performance (as per the TOP) on new, consecutive referrals until 15 total  
 1857 cases have been established for which the patient has either terminated or has been seen for at least 16  
 1858 weeks. Few therapists will fall in this second category, and even if they do, they will generally only  
 1859 need a few cases to reach 15. Thus, we expect no issues completing the phase 1 performance baseline  
 1860 and finalizing the match algorithm for the phase 2 RCT by the established contractual milestone of  
 1861 10/1/17.

1862  
1863 Our minimum target therapist sample is 44 PsychBC providers (all of whom will be over the age of 18  
1864 themselves, and treating patients within the age range of 18-65). Therapists will be psychologists,  
1865 clinical counselors, and social workers. Recruitment will be coordinated among our UMass-employed  
1866 project coordinator (PC), the PsychBC-employed PC, clinic staff members, and the Co-PIs.  
1867 Specifically, the PsychBC team will verbally present information about the study (both phases 1 and 2)  
1868 to their providers during staff meetings. Alternatively, this information can be presented through email.  
1869 At this preliminary recruitment stage, this information will be used to heighten awareness about the  
1870 study and to garner interest in participating. (The verbal script for staff meetings and the email text are  
1871 included as phase 1 attachments to this protocol.) The PsychBC PC will then provide the UMass PC  
1872 (via email) the names of providers who expressed interest in learning more about the study.  
1873

1874 The UMass PC will subsequently contact interested therapist participants via email or teleconference  
1875 (whichever is more convenient for the provider) to provide more study details/procedures and to direct  
1876 the provider to an online consent form and survey. Providers remaining interested will access the  
1877 secure study website to provide formal consent and to complete the baseline survey to which they will  
1878 be directed after consenting. Therapists will be told that the study is examining various referral  
1879 processes that will not affect their delivery of treatment-as-usual. They will be informed that they will  
1880 be blind to the specific nature of the referral manipulation in phase 2, but will be fully debriefed  
1881 following the entire study and offered an opportunity to provide feedback on their experience.  
1882 Therapists will also be informed of the assessments in which their study patients will engage in both  
1883 phase 1 (which is standard practice) and phase 2 (though they will not have access to the phase 2  
1884 research data at any time). Therapists will also need to consent to completing the aforementioned  
1885 baseline survey prior to phase 1, as well as a few study-specific measures for each patient during the  
1886 phase 2 RCT (the baseline survey and the phase 2 attachments are described in the relevant sections  
1887 below and are included as phase 1 and 2 attachments, respectively, to this protocol). Relevant to phase  
1888 1, therapists will be compensated with a \$20 Amazon gift card for the one-time completion of the  
1889 online baseline survey, which will take no longer than 25 minutes to complete. Non-consenting  
1890 therapists will receive case assignments as per standard care protocol and will simply not be included  
1891 in the study (though we will analyze consenting and non-consenting therapists on demographic  
1892 differences to see if any systematic sample bias exists).  
1893

1894 Once therapists are enrolled in the study, the research team will access their naturalistically collected  
1895 TOP data to establish their performance across the minimum 15 cases to determine their personal  
1896 strengths in treating patients across the risk-adjusted mental health problem domains measured by the  
1897 TOP (recall that nothing changes in the therapist's service operation during this phase and, in fact,  
1898 most of these TOP data points will have already been processed through ORI for cases seen by the  
1899 providers in the past). Specifically, to establish therapists' performance track records, we will draw on  
1900 each relevant patient's coded TOP data from baseline, week 8, and their termination point or week 16,  
1901 whichever comes sooner (to mimic the definition of treatment outcome in the RCT phase discussed  
1902 below). To reiterate, the research team is not formally enrolling patients into phase 1 of the study;  
1903 rather, their coded data are simply processed by ORI, through its business agreement with PsychBC  
1904 and its subcontractor role in the current project, to inform participating therapist report cards and the  
1905 match algorithm).  
1906

1907 Note that enrolled therapists will have an already-established TOP ID. This will allow the research  
1908 team to link therapists' baseline survey data to their RCT data (i.e., responses to their own measures  
1909 and their participating patients' measures) without use of any identifying information. As per  
1910 customary precautions described below, a key that links therapist names and contract information with  
1911 their data code will be kept in a separate, secure file that only trained research personnel can access.  
1912

1913 Relevant phase 1 attachments to this protocol:

- 1914  
1915 (1) Therapist recruitment materials: verbal script; email  
1916 (2) Therapist consent form and baseline phase 1 survey measures:  
1917

1918 *Provider Characteristics Form (PCF)*. This measure was developed by the research team to assess  
 1919 therapist demographic information, clinical experience, degree type, percent time seeing various  
 1920 patient types/diagnoses, any specialty training they have received, and dimensional ratings of the  
 1921 influence of various theoretical orientations on their treatment approach.

1922  
 1923 *Therapist Perceived Strengths (TPS)*. This measure was developed by the research team to assess  
 1924 therapists' beliefs about their effectiveness in treating the various TOP domains when uninformed of  
 1925 their data-driven TOP track record. This measure will allow us to examine how accurate therapists are  
 1926 in perceiving their own strengths and weaknesses.

1927  
 1928 Phase 2: At this phase, the RCT will commence. The therapists will have already consented prior to  
 1929 phase 1 to be involved in the entire study, and they will know that patient data from their naturalistic  
 1930 baseline cases will have been used to create a personalized performance report card that will inform a  
 1931 prospective match with new patients they will treat in the trial. The therapists themselves will not see  
 1932 their report cards (as they will have been informed at the time of consent); rather, this information will  
 1933 be used by the research team with regard to the match manipulation.

1934  
 1935 Phase 2 marks the beginning of *patient* recruitment into the RCT. The patient population will be adult  
 1936 men and women (age 18-65) in PsychBC's referral stream (largely Cleveland clinic and primary care  
 1937 [PCP] practice). Recruitment to the study simply means a willingness to be randomized to condition  
 1938 based on TOP-derived presenting problem and to complete supplemental assessments (for monetary  
 1939 compensation, as per below) at baseline, at regular intervals during treatment, and at posttreatment. As  
 1940 this is an effectiveness design with a premium on ecological validity and scalability, virtually all  
 1941 patients in the PsychBC network will be eligible. It is most likely that the sample will be predominated  
 1942 by the following problem domains: depression, panic, substance abuse, and poor quality of life. The  
 1943 only study-related patient-level exclusion criterion will be patients who are not the primary, informed  
 1944 decision-maker for their care. Thus, patients will present with a multitude of presenting problems  
 1945 across a spectrum of *Diagnostic and Statistical Manual of Mental Disorders* (5th ed.; *DSM-5*<sup>48</sup>)  
 1946 diagnoses. Our minimum study target sample size is 264 patients (6 per therapist).

1947  
 1948 We do not anticipate problems meeting our recruitment numbers in the project time frame, as PsychBC  
 1949 schedules approximately 950 new patients per month. Moreover, their care model already uses the  
 1950 TOP to screen patients for appropriate level of care, and, as a formal subcontract on the project, they  
 1951 are willing to use a patient-level-best-matched clinician list that is generated in real time (based on the  
 1952 predictive validity of our match algorithm). Including the randomization protocol into the treatment  
 1953 delivery model will not create any systemic barriers.

1954  
 1955 Patients will flow into PsychBC via electronic or self-referrals. At initial contact, the PsychBC PC will  
 1956 ask patients for permission to be contacted by study personnel (i.e., the UMass PC) if they are  
 1957 interested in learning more about participation (this verbal script remains included as a phase 2  
 1958 attachment to this protocol). If they are, they will be asked by the PsychBC PC to sign an authorization  
 1959 agreement (included in the phase 2 consent form) to allow their contact information (name, email  
 1960 address, and phone number) to be shared with the research team. The PsychBC PC's role is restricted  
 1961 to this recruitment task and administration of authorization to release the limited PHI; thus, no  
 1962 PsychBC personnel will be engaged in human subjects' research.

1963  
 1964 The PsychBC PC will provide the UMass PC with a daily list of referrals who have provided signed  
 1965 authorization to be contacted about the study. The UMass PC will then contact eligible patients to  
 1966 schedule a baseline consent/assessment. If a patient agrees to engage in a consent/baseline assessment  
 1967 session, the PC will schedule a teleconference diagnostic interview via a secure platform with a trained  
 1968 graduate clinical psychology research assistant (RA). During this session, the RA will first review the  
 1969 study details/procedures and respond to any questions. Patients will be told that the study is examining  
 1970 various referral processes that will not affect their treatment; they will be kept unaware of the specific  
 1971 nature of the referral manipulation, but will be told that they will be fully debriefed following the study  
 1972 and offered an opportunity to provide feedback on their experience (via an exit interview). They will  
 1973 also be told that although their participation in the trial will largely mimic the same treatment that they

1974 would receive if they were not participating, they must consent to be randomized, complete extra  
 1975 study-specific measures (before, during, and after treatment), complete an audio-recorded diagnostic  
 1976 interview (before and after treatment), and accept assignment to a clinician who will deliver individual  
 1977 psychotherapy. Patients will also be asked to remain with the same therapist through at least 16 weeks  
 1978 of treatment; however, if they request a transfer earlier, this will be treated as a dropout point for the  
 1979 sake of the trial.

1980  
 1981 If a patient consents to be enrolled, they will sign the consent form and complete a baseline survey of  
 1982 measures (i.e., the TOP-CR, TOP-CS, and TOP-CM, a brief measure of global distress, a measure of  
 1983 existential isolation, and a measure of interpersonal problems, all described below in the listing of  
 1984 relevant phase 2 attachments to this protocol) through a secure online platform linked to their typical  
 1985 TOP administration. Next, the trained research assistant (RA) will administer (on the same individual  
 1986 teleconference) the *M.I.N.I. 7.0.2 International Neuropsychiatric Interview* (described below in the  
 1987 listing of relevant phase 2 attachments to this protocol). Following PsychBC's standard intake process  
 1988 and this research-focused baseline consent/assessment session, patients will be randomized to  
 1989 condition and assigned to a provider based on the experimental parameters of that condition (i.e.,  
 1990 scientific match vs. pragmatic match). For their involvement in the additional diagnostic assessments  
 1991 and the additional measures that they will complete during the active treatment phase, patients will be  
 1992 compensated with a \$50 Amazon gift card (on a prorated schedule for any missed assessments).

1993  
 1994 After the full baseline assessment, patients will be randomly assigned to condition (scientifically  
 1995 informed matched vs. pragmatic match) with a participating PsychBC provider. The UMass PC will  
 1996 generate the randomization sequences using an online random generator. Within condition, patients  
 1997 will be assigned sequentially to the therapists until they reach their study quota of 6 patients. Patients  
 1998 in the match condition will be assigned to therapists who have a demonstrated strength (derived from  
 1999 the baseline period) in treating, at a minimum, the patient's highest self-reported distress domain on  
 2000 the TOP-CS. Beyond the minimal match on the most elevated TOP-CS domain, our match algorithm  
 2001 will attempt to match patients to therapists on as many TOP-CS dimensions as possible, ultimately  
 2002 providing PsychBC with at least several well-matched choices for assignment within the match  
 2003 condition. In order to preserve this level of choice, there will be natural variability in the number of  
 2004 well-matched domains (some patients matched only on the minimum 1 TOP-CS domain, others  
 2005 matched on 2 or more domains). The match variability across both conditions will allow us to measure  
 2006 degree of match dimensionally as a moderator variable of our main treatment effect. Therapists will  
 2007 also be unaware of their patient's treatment condition (double blind), and they will treat both matched  
 2008 and non-matched patients (i.e., they will be crossed over the two conditions to minimize administrative  
 2009 disruptions). In the low probability event that there is no therapist meeting minimal match criteria for a  
 2010 patient in the match condition, that patient will be removed from the primary study analyses (though  
 2011 will, of course, still be offered treatment-as-usual at the clinic) and replaced with the next patient  
 2012 where a match does exist. As described in our power analysis below, we are oversampling in order to  
 2013 account for these "dropouts," or removed data points.

2014  
 2015 In addition to the baseline assessments already described, patients will be assessed via online surveys  
 2016 at regular intervals during treatment (the secure ORI platform will email hyperlinks to these surveys  
 2017 with reminders to complete them at the appropriate time intervals; the UMass PC can also follow-up  
 2018 with phone calls if needed). These during-treatment assessments will include the TOP-CS and  
 2019 measures of existential isolation and interpersonal problems at every odd-numbered week after the  
 2020 start of treatment, as well as global distress, therapeutic alliance quality, perceived treatment  
 2021 credibility, and outcome expectation after every even-numbered session (all measures of these  
 2022 constructs are described below in the listing of relevant phase 2 attachments to this protocol). During  
 2023 treatment, participating therapists will also be asked to complete their respective versions of the  
 2024 alliance and credibility/expectation measures (also at even-numbered weeks; the UMass PC will email  
 2025 hyperlinks to these online surveys with reminders to complete them at the appropriate time intervals;  
 2026 the PC will also follow-up with phone calls if needed). For completing these measures, therapists will  
 2027 be compensated \$50 per patient (again in the form of Amazon gift cards). All data collection will be  
 2028 coordinated through ORI, for which patients and therapists are assigned unique codes. Through their

2029 business agreement, ORI has direct access to PBC medical records; thus, it can push the relevant  
2030 measures and track patient/therapist progress throughout the study.

2031  
2032 As reminder, in both conditions, the providers will deliver treatment naturalistically (i.e., with no  
2033 manipulation or influence from the research team). For the sake of the RCT, “treatment outcome” will  
2034 be considered the point at which treatment terminates, or 16 weeks, whichever comes sooner. After the  
2035 16<sup>th</sup> week, or the termination session if it comes sooner, patients will complete posttreatment measures:  
2036 the TOP-CS and TOP-CM, a measure of treatment satisfaction, a brief measure of global distress, a  
2037 measure of existential isolation, and a measure of interpersonal problems (all described below in the  
2038 listing of relevant phase 2 attachments to this protocol). Therapists will also document the nature of  
2039 termination (measure described below in the listing of relevant phase 2 attachments to this protocol).  
2040 Also at posttreatment, as defined by the trial, patients will undergo a repeat diagnostic telephone  
2041 assessment (i.e., an RA-administered M.I.N.I., as described above).

2042  
2043 We will also conduct a follow-up outcome assessment at 1 year after the patient’s own termination on  
2044 a randomly-selected subsample of 40 patients. Patients can easily be tracked in coordination with ORI  
2045 and PsychBC; further, patients will have provided consent for this follow-up contact (should they be  
2046 randomly chosen for it). At this assessment point, patients will again complete online the TOP-CS and  
2047 TOP-CM, the brief measure of global distress, the measure of existential isolation, and the measure of  
2048 interpersonal problems.

2049  
2050 Note that all self-report measures (for both patients and therapists) at all time-points will be completed  
2051 on Wi-Fi-connected tablets, or on home computers, through ORI’s secure web-based platform. The  
2052 TOP has its own dedicated website and HIPAA-compliant, secure server, and all other study-specific  
2053 measures will be integrated into the TOP administration process.

2054  
2055 We predict that the scientific match group will outperform the no match group to a clinically  
2056 significant degree on TOP outcomes, global symptomatology, and interpersonal problems. We also  
2057 expect that the match group will be more effective in promoting alliance quality and fostering more  
2058 positive patient perceptions of treatment credibility and outcome expectation, all of which are  
2059 established correlates (and candidate mechanisms) of positive treatment outcomes. Finally, we expect  
2060 there to be less patient dropout in the match condition, and higher patient treatment satisfaction.  
2061 Secondly, we will examine 4 potential moderators of the expected between-group treatment effects  
2062 on the primary TOP outcomes: (a) patient race (as it may be that the match algorithm is particularly  
2063 potent, and an important responsiveness tool, for historically understudied or underrepresented  
2064 patients), (b) degree of match of therapist strengths to patient problems (rated dimensionally as a ratio  
2065 given that therapists can be matched on more than just the minimum 1 domain, and the elimination of  
2066 harmful matches for any distressed domain reported by the patient), (c) patient distress severity, and  
2067 (d) complexity of patient presenting problem. Thus, we will test if matching is only, or particularly,  
2068 effective under the conditions of a central patient characteristic, a multiple domain match, and/or for  
2069 patients with the most severe or complex pathology. As noted, we will also assess therapists’ self-  
2070 perceived strengths on the TOP domains. We expect to replicate previous literature showing that  
2071 therapists are poor judges of their own efficacy, tending to underestimate negative effects and  
2072 overestimate positive effects with their patients (Lambert, 2011), which would further underscore the  
2073 importance of a data-driven match process.

2074  
2075 Finally, for a subsample of stakeholders, we will conduct post-trial exit interviews ( $N_s = 5$  patients, 5  
2076 therapists) to gather invaluable input on how to be responsive to the study findings in terms of  
2077 dissemination, implementation, and policymaking, including the potential importance of integrating  
2078 diagnosis, provider age, race, or gender into subsequent matching approaches. We will recruit  
2079 stakeholders in order of completion until we reach our target  $N_s$  (therapists can only be involved once  
2080 they have treated all 6 of their study patients). There are no other inclusion/exclusion criteria for the  
2081 exit interviews; we will simply stop asking if participants are interested once we have reached our  
2082 target  $N_s$ . This is consistent with the study consent forms, which clearly state that interested  
2083 participants may be selected to engage in the interview.

2084

2085 Fully reflecting stakeholder engagement, and to eliminate any biases or power dynamics introduced by  
 2086 the PIs or their research staff, Advisory Board members (with appropriate credentialing for working  
 2087 with human subjects) will conduct the individual interviews. The PIs (Constantino & Boswell) will  
 2088 train 3 Advisory Board members on qualitative interviewing, and each will administer 1-2 pilot  
 2089 interviews as part of the training, plus 5 study interviews. The interviews will be conducted and  
 2090 audiorecorded via a secure webconferencing service and will last approximately 45-60 minutes.  
 2091 Participants will be compensated with a \$100 Amazon gift card for their time. RAs will transcribe the  
 2092 interviews, removing any identifying patient information. These RAs will also conduct a qualitative  
 2093 analysis of these text-based data.

2094  
 2095 Relevant phase 2 attachments to this protocol:

- 2096  
 2097 (1) Patient phase 2 recruitment verbal script  
 2098 (2) Patient phase 2 consent form and phase 2 baseline measures packet:  
 2099

2100 *TOP-Consumer Registration Form* (TOP-CR; Kraus et al., 2005). The TOP-CR will be used routinely  
 2101 during the phase 1 baseline (and the phase 2 RCT) to assess patient demographics. On this form,  
 2102 patients indicate their age, gender, ethnicity, marital status, income level, employment status, religious  
 2103 identification, education level, general health status, and medical and mental health treatment history.  
 2104

2105 *TOP-Clinical Scales and Case Mix* (TOP-CS & TOP-CM; Kraus et al., 2005). This is the primary  
 2106 measure in our study; it will be used to establish the therapist report cards during the baseline phase to  
 2107 inform the match manipulation in phase 2. It also tracks patient outcomes. The TOP-CS consists of 58  
 2108 items assessing 12 symptom and functional (including strengths) domains (risk-adjusted for case mix  
 2109 variables assessed via 37 items on the companion TOP-CM, such as divorce, job loss, comorbidity):  
 2110 work functioning, sexual functioning, social conflict, depression, panic (somatic anxiety), psychosis,  
 2111 suicidal ideation, violence, mania, sleep, substance abuse, and quality of life. Global symptom severity  
 2112 is assessed by summing all items or by averaging the z-scores (i.e., standard deviation units relative to  
 2113 the general population mean) across each of the 12 clinical scales. Domain-specific symptom severity  
 2114 is quantified as the individual z-scores for each clinical scale using general population means and  
 2115 standard deviations for the conversion. The TOP-CS has been shown to have excellent factorial  
 2116 structure, as well as good test-retest reliability across all scales. It is sensitive to change while  
 2117 possessing limited floor and ceiling effects (Kraus et al., 2005). The TOP also has demonstrated good  
 2118 convergent validity with scales like the Beck Depression Inventory (Beck, Steer, & Brown, 1996) and  
 2119 the Brief Symptom Inventory (Derogatis, 1975).  
 2120

2121 *Symptom Checklist-10* (SCL-10; Rosen, Drescher, Moos, & Gusman, 1999). To evaluate outcome with  
 2122 an index separate from the TOP (to test convergence and enhance the validity of any between  
 2123 condition effects), we will also assess global distress with the SCL-10, a 10-item, well-validated and  
 2124 widely used self-report inventory that assesses psychological wellbeing.  
 2125

2126 *Existential Isolation Scale* (EIS; Pinel et al., 2014). To assess this isolation subtype, participants will  
 2127 complete the EIS, a six-item scale that requires participants to rate the extent to which they agree with  
 2128 items such as “I often have the same reactions to things as other people around me do” (reverse-coded)  
 2129 and “Other people usually do not understand my experiences” and “People often have the same ‘take’  
 2130 or perspective on things that I do” (reverse-coded). Participants respond using a 7-point scale. The EIS  
 2131 has high internal consistency, and has been validated extensively (Pinel et al., 2014).  
 2132

2133 *Inventory of Interpersonal Problems-32* (IIP-32; Horowitz, Alden, Wiggins, & Pincus, 2000). To  
 2134 assess interpersonal problems, participants will complete the 32-item circumplex version of the IIP.  
 2135 This widely used instrument reflects interpersonal inhibitions and excesses, with each item rated on a  
 2136 5-point scale. Higher total scores indicate more interpersonal problems. The IIP-32 also has 8  
 2137 subscales (Domineering, Vindictive, Intrusive, Cold, Socially Inhibited, Nonassertive, Overly  
 2138 Accommodating, and Self-Sacrificing) that comprise a circumplex of problematic interpersonal  
 2139 behavior around the main interpersonal dimensions of affiliation and control. Like the original measure



2140 (Horowitz, Rosenberg, Baer, Ureno, & Villansenor, 1988), the IIP-32 has evidenced good  
2141 psychometric properties.

2142  
2143 (3) RA administered diagnostic assessment (baseline and posttreatment):  
2144

2145 *M.I.N.I. 7.0.2 International Neuropsychiatric Interview* (M.I.N.I.; Sheehan et al.,  
2146 2016). The M.I.N.I. is a brief, structured diagnostic interview for DSM-5 and International  
2147 Classification of Diseases (ICD; World Health Organization, 2008) psychiatric disorder classification.  
2148 With its administration time of approximately 15 minutes, the M.I.N.I. is the psychiatric interview of  
2149 choice in clinical trials and epidemiological studies. Despite its brevity, its psychometric properties  
2150 compare favorably to longer instruments like the *Structured Clinical Interview for DSM* (SCID; First,  
2151 Spitzer, Gibbon, & Williams, 1996). As part of the diagnostic evaluation, the RAs will complete the  
2152 *Clinical Global Impression* (CGI), a widely used observer-rated scale that includes a 0-7 judgment of  
2153 illness severity for which higher scores indicate more extreme illness.

2154  
2155 (4) Patient phase 2 during-treatment measures:

2156 TOP-CS, SCL-10, EIS, IIP-32. All described previously.

2157  
2158 *Working Alliance Inventory-Short Form, patient version* (WAI-SF-P; Tracey,  
2159 & Kokotovic, 1989). The WAI is the most widely used alliance measure, assessing  
2160 patient-therapist agreement on the goals and tasks of treatment, and the quality of their relational bond.  
2161 This 12-item short form, assessing these dimensions from the  
2162 patient's perspective, has demonstrated sound psychometric properties.

2163  
2164 *Credibility/Expectancy Scale, patient version* (CEQ; Devilly & Borkovec, 2000). The CEQ is the most  
2165 widely used and psychometrically sound measure of the patient's  
2166 perceived logicalness of a given treatment and expectation for the personal efficacy of that treatment.

2167  
2168  
2169 (5) Therapist phase 2 during-treatment measures:

2170  
2171 *Working Alliance Inventory-Short Form, therapist version* (WAI-SF-T; Tracey & Kokotovic, 1989).  
2172 This is the parallel version of the WAI-SF described above, though now as rated from the therapist's  
2173 perspective.

2174  
2175 *Credibility/Expectancy Scale, therapist version* (CEQ; Devilly & Borkovec, 2000). This is the parallel  
2176 version of the CEQ described above, though now as rated from the therapist's perspective (i.e., the  
2177 therapist's sense of how logical the patient sees the treatment and how optimistic the patient is about  
2178 receiving benefit from it).

2179  
2180 (6) Patient phase 2 posttreatment measures:

2181 TOP-CS, TOP-CM, SCL-10, EIS, IIP-32. All described previously.

2182  
2183 *TOP-Satisfaction with the Treatment Process* (TOP-STP; Kraus et al., 2005). This 32-item measure  
2184 assesses patient's satisfaction with their provider, the treatment they received, and the treatment milieu  
2185 (e.g., staff, other patients, etc.).

2186  
2187  
2188 (7) Therapist phase 2 posttreatment measure:

2189  
2190 *Nature of Termination Form* (NTF). This measure was developed by the research team to assess the  
2191 nature of patients' termination from the provider's open-ended perspective, as well as through a choice  
2192 format of unilateral/patient-generated, unilateral/therapist-generated, or mutual. Therapists can also  
2193 describe in an open-ended format any unusual or noteworthy circumstances that may have led to the  
2194 termination of therapy with this client (e.g., transfer of client to another therapist).

2195

2196 (8) Patient phase 2 subsample follow-up measures:  
 2197  
 2198 TOP-CS, TOP-CM, SCL-10, EIS, IIP-32. All described previously.  
 2199

2200 (9) Stakeholder exit interview protocols (patient and therapist versions)  
 2201

2202 **b. State if audio or video taping will occur. Describe what will become of the tapes after use, e.g.,**  
 2203 **shown at scientific meetings, erased. Describe the final disposition of the tapes.**

2204 For the baseline and posttreatment patient assessments during phase 2, RAs will administer via  
 2205 teleconference the semi-structured diagnostic interview (M.I.N.I.), which will be audiorecorded. This  
 2206 will allow a different RA to review the recording and to make independent diagnostic and symptom  
 2207 severity determinations. With these two sets of ratings, we can then calculate interrater reliability on  
 2208 baseline and posttreatment diagnosis.  
 2209

2210 Audio recordings from the baseline diagnostic assessments will be digitally stored through the secure  
 2211 web-conferencing service. All data will be encrypted and password protected. Only the necessary  
 2212 research team members will know the login and password information and have the capacity to access  
 2213 the recordings. When it is time to analyze the recordings for reliability coding, designated, trained RAs  
 2214 will also have access to the recordings. The RAs, of course, will have completed the mandatory ethics  
 2215 training in human subjects' research, data management, and HIPAA compliance. These RAs will be  
 2216 independent evaluators who will not have access to other therapist or patient data. The recordings  
 2217 themselves will not be labeled with any identifiable information. The PI will routinely monitor the  
 2218 collection and analysis of recorded data.  
 2219

2220 After the recordings have been assessed for diagnostic reliability, the files will be securely deleted by  
 2221 the sponsored project contract term date of 6/16/20. No audio data or identifiable text data stemming  
 2222 from the recordings will be presented at meetings or in published articles. Only the reliability  
 2223 coefficients will be disseminated with the results of the full trial.  
 2224

2225 **c. State if deception will be used. If so, provide a rationale and describe debriefing procedures.**  
 2226 **Submit a debriefing script in Section #11 (Attachments).**

2227 Although the protocol does not involve deception, it does involve incomplete  
 2228 disclosure in Phase 2 given that participants are not given all of the information  
 2229 about the study until debriefing. Thus, in the debriefing form, we provide  
 2230 participants the opportunity to withdraw their data upon learning the full scope of  
 2231 the research.  
 2232

2233 **3. Background**  
 2234

2235 **a. Describe past findings leading to the formulation of the study.**

2236 Research has consistently identified significant variability in skill and outcomes between therapists  
 2237 (Baldwin & Imel, 2013; Boswell et al., 2013; Westra, Constantino, Arkowitz, & Dozois, 2011), even  
 2238 when therapists utilize an empirically supported treatment (EST). In fact, differences between  
 2239 treatment providers account for a greater portion of treatment outcome variance than the specific  
 2240 interventions delivered in controlled trials (Krause, Lutz, & Saunders, 2007; Wampold & Imel, 2015).  
 2241 Thus, improvements in MHC can occur by identifying effective providers in addition to promoting  
 2242 ESTs (Kraus et al., 2007).  
 2243

2244 In the largest study to date on this topic, our team investigated therapists' naturalistic treatment  
 2245 outcomes over many different problem domains (e.g., depression, anxiety, substance use, mania, sleep)  
 2246 in a sample of 6,960 patients and nearly 700 providers (Kraus, Castonguay, Boswell, Nordberg, &  
 2247 Hayes, 2011). The majority of therapists demonstrated a differential pattern of effectiveness depending  
 2248 on the problem domain, and therapist domain-specific effectiveness correlated poorly across domains  
 2249 suggesting that therapist competencies may be domain-specific, rather than reflecting a core attribute  
 2250 or general underlying therapeutic skill. Importantly, although some therapists demonstrated  
 2251 effectiveness over multiple problem domains, no therapists demonstrated reliable effectiveness across

2252 all domains. Further, a small, but notable 4% of the therapists did not demonstrate effective outcomes  
 2253 on any domain. These data suggest that in any population of therapists (payer network, hospital, or  
 2254 community mental health  
 2255 system), there is an opportunity for behavioral health to do what medicine did decades ago – encourage  
 2256 provider specialization. Virtually every clinician has an area where they are above average (82-96%;  
 2257 Kraus et al., 2011, 2016), and our research suggests that if they specialize to their unique skills,  
 2258 population-level outcomes (i.e., symptom reduction, behavior change, increased functionality) will  
 2259 improve dramatically. This would reflect a major, and likely highly impactful shift to current MHC  
 2260 systems.

2261  
 2262 However, patients and referrers are typically unaware of the unique track record (“report cards”) of  
 2263 local-area providers, which represents a critical gap in knowledge transfer within the MHC system.  
 2264 Without systematically collecting and disseminating performance report cards, stakeholders (e.g.,  
 2265 patients, therapists, administrators responsible for case assignment, primary care physicians) lack vital  
 2266 information on which to base MHC choices and referral decisions, and that can inform personalized  
 2267 treatment (Boswell, Constantino, Kraus, Bugatti, & Oswald, 2015). Conversely, there is potentially  
 2268 immense advantage to matching patients to providers based on scientific outcome data (Constantino,  
 2269 Boswell, Bernecker, & Castonguay, 2013).

2270  
 2271 Consistent with this notion, the Institute of Medicine (IOM) has made recommendations to: (a)  
 2272 customize care based on the patient’s needs, (b) share knowledge, (c) engage in data-driven decision-  
 2273 making, (d) promote transparency (including information on performance and patient satisfaction;  
 2274 Kohn, Saxena, Levav, & Saraceno, 2004), and (e) use valid and reliable assessment instruments to  
 2275 assess progress and to aid decision-making. The IOM has also recommended that MHC patients be  
 2276 provided with information on the quality of practitioner care (e.g., provider report cards) and use this  
 2277 information when making treatment decisions. Importantly, we have survey data that point to MHC  
 2278 patients, therapists, and administrators endorsing such applied knowledge transfer as a high priority  
 2279 (Boswell et al., 2015). Provider track record report cards are meaningful data to the MHC patient  
 2280 population, as are the mental health benefits that could stem from being well matched to provider.

2281  
 2282 We have developed over the past 20 years an innovative, technology-based mechanism/intervention to  
 2283 deliver report cards and drive this match concept within a patient-centered MHC model (Kraus et al.,  
 2284 2011). Our longitudinal data suggest that our match algorithm, based on our multidimensional outcome  
 2285 tool (the TOP) is efficacious for MHC outcomes. In addition to our study highlighted above (Kraus et  
 2286 al., 2011), a more recent prospective study of 59 therapists and 3,540 patients resulted in a between-  
 2287 treatment controlled Cohen’s  $d$  effect size of .80 (Kraus et  
 2288 al., 2016). Each therapist’s first 30 patients were used to classify a therapist’s skills in the 12 domains  
 2289 of symptoms and functioning as either statistically above average, average, or below average. The best  
 2290 matching algorithm functioned as follows: for each new, successive patient, he or she was classified as  
 2291 well-matched if the risk of harm was eliminated (i.e., the therapist was not below average when  
 2292 treating any elevated domain) and the therapist was above average in treating the patient’s three most  
 2293 out-of-the-norm domains (e.g., depression, suicidality, and panic). Poorly matched patients had below  
 2294 average outcomes, with small effect sizes ( $d = .30$ ) Well-matched patients, by contrast, achieved very  
 2295 large pre- vs. posttreatment effect sizes of  $d = 1.19$ . These data lend strong support that the proposed  
 2296 comparative effectiveness research (CER) will yield similar results (i.e., increased efficacy and  
 2297 reduced harm) in realigning the skills of a large population of therapists in one of the forerunner  
 2298 Accountable Care Organizations (our partner PsychBC) when matching empirically derived therapist  
 2299 skills with patient need. The technology/intervention is well established, it has demonstrated efficacy,  
 2300 and awaits investigation in a well-powered RCT.

#### 2301 2302 4. Subject Population

- 2303  
 2304 a. **State how many subjects you propose to use and state the rationale for the proposed number.**  
 2305 For the primary 3-level hierarchical model assessing treatment condition effects at the patient level on  
 2306 linear change rates within patients, we used Raudenbush and Liu’s (2001) formula as incorporated in  
 2307 the Optimal Design program to determine the minimum numbers of therapists and patients needed to

2308 detect a moderate effect of condition (standardized difference between change rates = .50). With a  
 2309 minimum of 6 measurements spaced over the maximum 16 treatment weeks and assuming 5 patients  
 2310 per therapist, an intra-class correlation of .15, and an alpha of .05, we will need a total of 44 therapists  
 2311 and 220 patients to achieve a power of .80 to detect moderate condition effects on linear change rates.  
 2312 Factoring a 20% dropout rate at the patient level, running our experiment on 264 patients (6 per  
 2313 therapist) should provide sufficient statistical power to detect group differences on our primary  
 2314 outcome variables.  
 2315

2316 To summarize, based on this power analysis, we will for phase 1 access a naturalistic baseline  
 2317 assessment of a minimum of 44 consenting therapists' performance across a minimum of 15 cases to  
 2318 determine their strengths in treating the risk-adjusted domains measured by the TOP. We will then  
 2319 recruit a minimum of 264 patients for the phase 2 trial, assigning patients to the same 44 therapists  
 2320 who participated in phase 1 (they will see 6 cases each during the trial).  
 2321

- 2322 **b. Describe the subject population, including the age range, gender, ethnic background, and type of**  
 2323 **subjects (e.g. students, professors, subjects with learning disabilities, mental health disorders,**  
 2324 **etc.). Please incorporate specific inclusion/exclusion criteria (e.g. physical and psychological**  
 2325 **health, demographic information, or other unique characteristics).**

2326 Therapist participants: As noted, our target sample is 44 therapist participants (age *range* = 30-65  
 2327 years) who will be social workers, psychologists, and licensed clinical counselors. Reflecting  
 2328 PsychBC's therapist pool demographics, we anticipate that our provider sample will break down as  
 2329 follows: approximately 70% will be female; 88% will be white/non-Hispanic, 3% Black, 2% Hispanic,  
 2330 2% "Other/mixed," and 5% Asian. Based on these projections and our power analysis, our  
 2331 targeted/planned therapist enrollment is indicated in an attached Targeted/Planned Enrollment Table  
 2332 (Therapists).  
 2333

2334 Patient participants: Patient participants will be 264 adult men and women (age 18-65) in PsychBC's  
 2335 referral stream (largely Cleveland clinic and primary care [PCP] practice). Recruitment to the study  
 2336 simply means a willingness to be randomized to condition and to complete supplemental assessments  
 2337 (for monetary compensation) at baseline, at regular intervals during treatment, and at posttreatment. As  
 2338 this is an effectiveness design with a premium on ecological validity and scalability, virtually all  
 2339 patients in the PsychBC network will be eligible. It is most likely that the sample will be predominated  
 2340 by the following problem domains: depression, panic, substance abuse, and poor quality of life. The  
 2341 only study-related, patient-level exclusion criterion will be patients who are not the primary, informed  
 2342 decision-maker for their care. Thus, patients will present with a multitude of presenting problems  
 2343 across a spectrum of *Diagnostic and Statistical Manual of Mental Disorders* (5th ed.; *DSM-5*)  
 2344 diagnoses. The composition of our sample will roughly match the average utilization data for age,  
 2345 gender, and race/ethnicity at PsychBC. Based on these projections and our power analysis, our  
 2346 targeted/planned patient enrollment is attached in an Estimated Final Racial/Ethnic and Gender  
 2347 Enrollment Table (Patients).  
 2348

- 2349 **c. State the number and rationale for involvement of potentially vulnerable subjects to be entered**  
 2350 **into the study, including minors, pregnant women, prisoners, economically and educationally**  
 2351 **disadvantaged, decisionally challenged, and homeless people.**

2352 We are not specifically targeting these specific vulnerable populations, and our research design and/or  
 2353 the PsychBC care system will specifically exclude minors and prisoners. However, given the  
 2354 effectiveness design focused on maximizing ecological validity, some of our patients are sure to have  
 2355 economic and educational vulnerabilities, which are risk factors for mental health issues. Some women  
 2356 might also be pregnant.  
 2357

- 2358 **d. If women, minorities, or minors are not included, a clear compelling rationale must be provided.**  
 2359 Minors will be excluded because they are typically not solely responsible for their own treatment  
 2360 decisions, and the outcome measure used in this study, and on which the match manipulation is based,  
 2361 focuses on adults.  
 2362

- 2363 e. **State the number, if any, of subjects who are laboratory personnel, employees, and/or students.**  
 2364 **They should be presented with the same written informed consent. If compensation is allowed,**  
 2365 **they should also receive it.**  
 2366 N/A  
 2367
- 2368 f. **State the number, if any, of subjects who are involved in research conducted abroad and**  
 2369 **describe any unique cultural, economic or political conditions.**  
 2370 N/A  
 2371
- 2372 g. **Describe your procedures for recruiting subjects, including how potential subjects will be**  
 2373 **identified for recruitment. Attach advertisements, flyers, etc. in Section #11 (Attachments). Note:**  
 2374 **Potential subjects may not be contacted before IRB approval.**  
 2375 Therapist participants:  
 2376  
 2377 Recruitment will be coordinated among our UMass-employed PC, the PsychBC-employed PC, clinic  
 2378 staff members, and the Co-PIs, and will involve presenting information about the study (both phases 1  
 2379 and 2) to providers through verbal script at staff meetings or by email. At this preliminary recruitment  
 2380 stage, this information will be used to heighten awareness about the study and to garner interest in  
 2381 participating. The PsychBC PC will then provide the UMass PC (via email) the names of providers  
 2382 who expressed interest in learning more about the study. The UMass PC will subsequently contact  
 2383 interested therapist participants via email or teleconference (whichever is more convenient for the  
 2384 provider) to provide more study details/procedures and to direct the provider to an online consent form  
 2385 and survey. Providers remaining interested will access the secure study website to provide formal  
 2386 consent and to complete the baseline survey to which they will be directed after consenting. Therapists  
 2387 will be told that the study is examining various referral processes that will not affect their delivery of  
 2388 treatment-as-usual. They will be informed that they will be blind to the specific nature of the referral  
 2389 manipulation in phase 2, but will be fully debriefed following the entire study and offered an  
 2390 opportunity to provide feedback on their experience. Therapists will also be informed of the  
 2391 assessments in which their study patients will engage in both phase 1 (which is standard practice) and  
 2392 phase 2 (though they will not have access to the phase 2 research data at any time). Therapists will also  
 2393 need to consent to completing the aforementioned baseline survey prior to phase 1, as well as a few  
 2394 study-specific measures for each patient during the phase 2 RCT.  
 2395  
 2396 Patient participants:  
 2397  
 2398 Phase 2 marks the beginning of *patient* recruitment into the RCT. Recruitment to the study simply  
 2399 means a willingness to be randomized to condition and to complete supplemental assessments (for  
 2400 monetary compensation). Patients will flow into PsychBC via electronic or self-referrals. At initial  
 2401 contact, the PsychBC PC will ask patients for permission to be contacted by study personnel (i.e., the  
 2402 UMass PC) if they are interested in learning more about participation. If they are, they will be asked by  
 2403 the PsychBC PC to sign an authorization agreement (included in the consent form) to allow their  
 2404 contact information to be shared with the research team. The PsychBC PC's role is restricted to this  
 2405 recruitment task and administration of authorization to release the limited PHI; thus, no PsychBC  
 2406 personnel will be engaged in human subjects' research.  
 2407  
 2408 The PsychBC PC will provide the UMass PC with a daily list of referrals who have provided signed  
 2409 authorization to be contacted about the study. The UMass PC will then contact eligible patients to  
 2410 schedule a baseline consent/assessment. If a patient agrees to engage in a consent/baseline assessment  
 2411 session, the PC will schedule a teleconference diagnostic interview via a secure platform with a trained  
 2412 graduate clinical psychology research assistant (RA). During this session, the RA will first review the  
 2413 study details/procedures and respond to any questions. Patients will be told that the study is examining  
 2414 various referral processes that will not affect their treatment; they will be kept unaware of the specific  
 2415 nature of the referral manipulation, but will be told that they will be fully debriefed following the study  
 2416 and offered an opportunity to provide feedback on their experience (via an exit interview). They will  
 2417 also be told that although their participation in the trial will largely mimic the same treatment that they  
 2418 would receive if they were not participating, they must consent to be randomized, complete extra

2419 study-specific measures (before, during, and after treatment), complete an audio-recorded diagnostic  
 2420 interview (before and after treatment), and accept assignment to a clinician who will deliver individual  
 2421 psychotherapy. Patients will also be asked to remain with the same therapist through at least 16 weeks  
 2422 of treatment; however, if they request a transfer earlier, this will be treated as a dropout point for the  
 2423 sake of the trial. If the patient consents to be enrolled, they will sign the consent form and complete a  
 2424 baseline survey of measures (i.e., the TOP-CR, TOP-CS, and TOP-CM, a brief measure of global  
 2425 distress, a measure of existential isolation, and a measure of interpersonal problems) through a secure  
 2426 online platform linked to their typical TOP administration. Next, the trained RA will administer (on the  
 2427 same individual teleconference) the M.I.N.I. Following PsychBC's standard intake process and this  
 2428 research-focused baseline consent/assessment session, patients will be randomized to condition and  
 2429 assigned to a provider based on the experimental parameters of that condition (i.e., scientific match vs.  
 2430 pragmatic match).  
 2431

2432 **h. Compensation. Explain the amount and type of compensation (payment, experimental credit, gift**  
 2433 **card, etc.), if any, that will be given for participation in the study. Include a schedule for**  
 2434 **compensation and provisions for prorating.**

2435 Therapist participants:

2436  
 2437 Therapists will complete, in no longer than 25 minutes, a few study-specific measures as part of a  
 2438 phase 1 baseline survey for which they will be compensated \$20 in total (in the form of an Amazon  
 2439 gift card).  
 2440

2441 During Phase 2, therapists will also complete a few study-specific measures throughout treatment with  
 2442 each of the 6 participating patients treated during the phase 2 RCT; they will be compensated \$50 per  
 2443 patient for this additional, but minimal, time burden. The compensation will again be in the form of an  
 2444 Amazon gift card.  
 2445

2446 If therapists complete their measurement schedule through all possible contact points for a given  
 2447 participating patient (i.e., baseline + 16 treatment weeks = 17 weeks), or complete their measurement  
 2448 schedule through a planned termination for a participating patient that occurs prior to week 16 of  
 2449 treatment, they will receive full compensation (i.e., a \$50 gift card for that patient).  
 2450

2451 However, if a therapist withdraws from the study, they will have the option to be compensated on a  
 2452 prorated basis for the measures that they have already completed regarding each of their participating  
 2453 patients. This proration works out to approximately \$3 per week for a participating patient, which will  
 2454 be deducted for the number of weeks "missing" from therapists' assessment schedule (i.e., based on  
 2455 the point at which the therapist withdrew from the study). For example, if a therapist completes the  
 2456 measurement schedule for a given patient through week 8 (9 weeks, including baseline) and then  
 2457 withdraws from the study, they will have "missed" 8 weeks of data collection for that participating  
 2458 patient. Their compensation for this participating patient will be adjusted as follows: \$50 - \$24 (\$3 x 8  
 2459 weeks) = \$26. This adjustment will be completed for any and all relevant participating patients. To  
 2460 summarize, therapists who withdraw from the study will have the option either to (a) receive their  
 2461 relevant prorated compensation, or (b) to forgo prorated compensation in order to no longer be  
 2462 contacted by the research team.  
 2463

2464 If the therapist participates in an exit interview, he or she will receive full compensation in the form of  
 2465 an additional \$100 Amazon gift card.  
 2466

2467 Patient participants:

2468  
 2469 Patients in Phase 2 will undergo a semi-structured diagnostic interview at both baseline and  
 2470 posttreatment, as well as complete several study specific measures throughout treatment (and, if  
 2471 randomly selected, at a follow up); they will be compensated \$50 total for these non-routine aspects of  
 2472 their care. The compensation will be in the form of an Amazon gift card. If patients complete their  
 2473 measurement schedule through all possible contact points (i.e., baseline + 16 treatment weeks = 17  
 2474 weeks), or complete their measurement schedule through a planned termination that occurs prior to

2475 week 16 of treatment, they will receive full compensation. However, if they drop out of treatment prior  
 2476 to week 16, and their end point was not a planned termination that can be considered posttreatment for  
 2477 the purpose of the study, compensation will occur on prorated schedule. This works out to  
 2478 approximately \$3 per week, which will be deducted for the number of weeks “missing” from the  
 2479 schedule. For example, if a patient completes the measurement schedule through week 8 (9 weeks,  
 2480 including baseline), and they did not engage in a planned termination, they will have “missed” 8 weeks  
 2481 of data collection. Their compensation will be adjusted as follows: \$50 - \$24 (\$3 x 8 weeks) = \$26.  
 2482

2483 Patients who withdraw from the study (which is distinct from simply dropping out of treatment) will be  
 2484 given the option to (a) receive prorated compensation for the completion of measures up until the point  
 2485 of withdrawal (following the proration schedule outline above), or (b) to forgo prorated compensation  
 2486 in order to no longer be contacted by the research team.  
 2487

2488 If the patient participates in an exit interview, he or she will receive full compensation in the form of  
 2489 an additional \$100 Amazon gift card.  
 2490

2491 Finally, note that in the event that a participant (either a patient or therapist) withdraws from the study  
 2492 during phase 2, the other dyad member (either the patients seen by a withdrawing therapist or the  
 2493 therapist treating a withdrawing patient) will not be penalized; that is, as long as they have already  
 2494 consented to the study, they will receive the full amount of reimbursement (i.e., a \$50 gift card)  
 2495 regardless of the point at which their patient/therapist withdraws. However, note that consistent with  
 2496 the wishes of the participant, we will, of course, stop collecting data at the point of withdrawal (i.e., if  
 2497 therapists withdraw, we will stop collecting data from their patients who will be compensated fully; if  
 2498 patients withdraw, we will stop collecting data from their therapist regarding that patient and the  
 2499 therapist will be compensated fully for that patient).  
 2500

- 2501 **i. Please state: A: The total expected duration of the study, including the time expected for data**  
 2502 **analysis (e.g., This study is expected to last 1 year) AND B: How much time each subject is**  
 2503 **expected to be involved in the study (e.g., The involvement of each subject will be 1-session for a**  
 2504 **total of 90 minutes).**

2505 A) The project is funded in the form a cost-reimbursement contract for which a specific milestone  
 2506 schedule exists. The contract start date is 9/15/16 and the contract term date is 6/15/20. All analyses  
 2507 will be completed by the term date. Details are available in the attached updated milestone schedule.  
 2508

2509 B) Therapist subjects will be involved for 2 months in phase 1, as well as through the phase 2 trial  
 2510 (approximately 2 years, though with variability depending on when they have been assigned and have  
 2511 treated their 6 study cases). Patients in phase 2 only will be involved in the study protocol through their  
 2512 actual termination point or 16 weeks, whichever comes sooner (we will also conduct a follow-up  
 2513 outcome assessment at 1 year after termination on a randomly-selected subsample of 40 patients).  
 2514

## 2515 5. Risks

2516 HHS Regulations define a subject at risk as follows: “...any individual who may be exposed to the possibility of  
 2517 injury, including physical, psychological, or social injury, as a consequence of participation as a subject in any  
 2518 research...” This also includes risks to subject confidentiality and any discomforts, hazards, or inconveniences.  
 2519

2520 For the categories below, include a description of risks.  
 2521

- 2522 **a. Describe the risks related to:**

2523 **Physical well-being**

2524 None anticipated.  
 2525

2526 **Psychological well-being**

2527 Regardless of condition, PsychBC will employ its usual triage assessments, therapists will employ  
 2528 their usual treatments, and patients will be receiving their usual care. Consequently, there are no risks  
 2529 from our research protocol over and above what would normally be expected in routine assessment and  
 2530

2531 psychotherapy, and PsychBC has its usual clinical and safety protocols in place (and the clinical  
2532 personnel to execute them).

2533  
2534 In treatment, some individuals may experience emotional upset during sessions. Additionally, some  
2535 participants may experience disappointment with their rate of progress or setbacks. The risk associated  
2536 with such reactions will be addressed clinically by the therapists who are treating these issues and who  
2537 have peer and administrative support. To reiterate, these treatment risks would occur in the course of  
2538 treatment-as-usual. These are not additional risks stemming from the research protocol. Further, the  
2539 TOP outcome monitoring system, which is at the center of our research project, is already being used  
2540 by PsychBC providers without incident.

2541  
2542 As is typical in psychological research, some of the assessment questions from the research measures  
2543 may be experienced as intrusive and/or may cause anxiety. The risk from such increased anxiety,  
2544 however, is mitigated by the use of skilled and extensively trained assessors who are aware that such  
2545 reactions may be related to a person's presenting problems, or simply a function of the intimate and  
2546 emotionally intense nature of psychological services. In addition, the PIs, PCs, and/or PsychBC staff  
2547 and administrators will be available to meet with any participant who may be unduly disturbed due to  
2548 the few research tasks. Because the pre- and posttreatment diagnostic interviews will be conducted via  
2549 telephone, the graduate RA (being trained as a clinician and supervised by their site PI, Dr.  
2550 Constantino or Boswell, both of whom are licensed clinical psychologists and mental health care  
2551 providers) will have the patient's contact information (phone number and email address) on hand. If  
2552 the patient reveals clinically elevated suicidality or homicidality, the RA will contact 9-1-1 and report  
2553 the patient's contact information and location address (which they will request verbally, if necessary)  
2554 for emergency response. The RA, if applicable, will also execute any duty to warn to the best of their  
2555 ability (in addition to contacting the local authorities).

2556  
2557 **Economic well-being**

2558 Given that therapist performance data are being collected, it is reasonable to be concerned about  
2559 possible employment implications were an employer (i.e., clinic administrator) to attempt to interpret  
2560 study information incompletely (i.e., infer lack of therapist effectiveness to the point of questioning  
2561 employability). This risk, however, is extremely minimal for the following reasons:

2562  
2563 (1) As a condition of being involved in the study, clinic administrators will be required to agree that  
2564 therapists' participation or non-participation in this research will in no way affect their  
2565 standing/employment at their community mental health clinic.

2566  
2567 (2) The research team will not reveal therapist performance data to clinic administrators or staff  
2568 members; that is, the study could be considered "triple-blind." Neither patients nor therapists will  
2569 know when they are in an experimentally-matched vs. typically-matched dyad, and administrators/staff  
2570 members will not have access to the therapists' report cards.

2571  
2572 (3) However, administrators and staff members are required to be in the know about well-matched  
2573 therapist "short-lists," as this is essential to the research design; that is, when patients are randomized  
2574 to a well-matched therapist, those potential therapists need to be identifiable. It is possible that  
2575 administrators or staff members might misinterpret these data to suggest that a given therapist is  
2576 ineffective (if he or she is never or rarely showing up on a shortlist). However, we will guard against  
2577 this misinterpretation by educating administrators and staff members that the shortlist only represents,  
2578 in a small cross-section of time, therapists that have been shown to be effective on at least 1 of 12  
2579 domains, which represents a given patient's most severe problem at that time (the match criterion). We  
2580 will stress that this does not mean that a therapist is globally ineffective. It may just be that patients  
2581 randomly assigned to the match group are tending not to have the types of problems for which a given  
2582 therapist is relatively effective. That therapist, though, could be highly effective at treating one or even  
2583 many other domains.

2584  
2585 (4) Finally, administrators and staff members will not be told which therapists are or are not  
2586 participating in the study. Thus, lack of being on a shortlist, for all that they will know (unless a



2587 therapist openly reveals that he or she is participating in the study), could simply connote a choice to  
 2588 not participate in the project.  
 2589

2590 **Social well-being**

2591 None anticipated.  
 2592

2593 **Breach of confidentiality (including audio/video taping)**

2594 A breach of confidentiality represents a risk, but every step will be taken to minimize this risk.  
 2595 PsychBC and ORI routinely handle PHI and are in compliance with HIPAA regulations. Any “hard”  
 2596 materials (e.g., diagnostic assessment summaries) that are collected for research purposes only will be  
 2597 stored in a locked cabinet in the PI’s Psychotherapy Research Lab. There will be no hard copy data  
 2598 collected at the PsychBC clinic sites. Most of the data collected in this study (including consent) will  
 2599 be through a secure, web-based platform using a tablet or computer. This method offers greater  
 2600 protection because it guards against human error and negates the need for long-term storage of paper  
 2601 forms. Finally, digital recordings of diagnostic assessments will be stored in a secure, password  
 2602 protected website. The recordings themselves will be encrypted  
 2603

- 2604 **b. For research conducted internationally, describe any political or sociocultural**  
 2605 **considerations that may affect your research design (for example, in some communities it may**  
 2606 **not be customary to sign documents, etc.)**

2607 N/A  
 2608

- 2609 **c. Discuss plans for ensuring necessary medical or professional intervention in the event of a**  
 2610 **distressed subject.**

2611 The Co-PIs, project coordinator, PsychBC staff members, and PsychBC administrators will monitor  
 2612 the treatments and data collection; thus, they can assist in regularly monitoring any adverse events.  
 2613 Such negative occurrences are unlikely to be trial-related, as all patients will be receiving treatment-as-  
 2614 usual. Therefore, any adverse event will be addressed with PsychBC’s well-established procedures for  
 2615 monitoring services and managing treatment-related disturbances. Nevertheless, any adverse event will  
 2616 be recorded and immediately reported to the IRB (UMass), PCORI (funder), and the project’s Data  
 2617 Safety and Monitoring Board (DSMB).  
 2618

2619 Should, during the course of the study, a patient show evidence of psychological or physical  
 2620 deterioration, the patient will be assessed comprehensively in the domains of concern (except in the  
 2621 case of a life-threatening physical emergency, such as the emergence of acute chest pain, in which case  
 2622 9-1-1 will be called immediately). If the therapist deems that the patient meets criteria for a psychiatric  
 2623 hold (e.g., patient is an imminent danger to self or others), the therapist will arrange for the patient to  
 2624 be brought to the emergency department and will contact his/her PsychBC administrator and the PI to  
 2625 debrief. If a patient is not meeting criteria for a psychiatric hold, but is showing clear signs of  
 2626 decreased mental status, the therapist will continue to meet with the patient, as well as - in consultation  
 2627 with the PsychBC administrator - make arrangements for the most appropriate level of care.  
 2628

2629 As noted, because the pre- and posttreatment diagnostic interviews will be conducted via telephone,  
 2630 the graduate RA (being trained as a clinician and supervised by their site PI, Dr. Constantino or  
 2631 Boswell, both of whom are licensed clinical psychologists and mental health care providers) will have  
 2632 the patient’s contact information (phone number and email address) on hand. If the patient reveals  
 2633 clinically elevated suicidality or homicidality, the RA will contact 9-1-1 and report the patient’s  
 2634 contact information and location address (which they will request verbally, if necessary) for emergency  
 2635 response. The RA, if applicable, will also execute any duty to warn to the best of their ability (in  
 2636 addition to contacting the local authorities).  
 2637

2638 **6. Benefits**

- 2639  
 2640 **a. Describe the potential benefit(s) to be gained by the subjects or by the acquisition of important**  
 2641 **knowledge which may benefit future subjects, etc. (This DOES NOT include compensation or**  
 2642 **extra credit).**

2643 The most direct benefit a participant in this study may receive is the reduction of symptom-related  
 2644 distress and improved functioning. In addition, patients (especially those in the match condition) will  
 2645 receive more personalized MHC. Psychotherapists (especially those in the match condition) may  
 2646 experience a greater level of positive impact across their caseloads. Given that the actual treatments  
 2647 being provided will not be manipulated, the benefits of participation are judged to far outweigh the  
 2648 potential study-specific risks.

2649  
 2650 There is immense potential for future therapists and patients to benefit from the results of this study; if  
 2651 the hypotheses are supported, there will be cause for substantial revamping of MHC systems to  
 2652 capitalize on matching patients to therapists who have an empirically demonstrable track record of  
 2653 strength in treating patients with similar presenting problems.

## 2654 7. Procedures to Maintain Confidentiality

### 2655 a. Describe the procedures in place which protect the privacy of the subjects and maintain the 2656 confidentiality of the data, as required by the federal regulations, if applicable.

2657 Multiple steps will be taken to protect confidentiality. As mentioned, minimal paper forms (e.g.,  
 2658 diagnostic summary forms) will be kept in a locked cabinet in the PI's locked Psychotherapy Research  
 2659 Lab. There will be no hard copy data collected at the PsychBC sites. Virtually all of the data collected  
 2660 in this study (including consent) will be through a secure, web-based platform using a tablet or  
 2661 computer. This method offers greater protection because it guards against human error and negates the  
 2662 need for long-term storage of paper forms. Digital recordings of diagnostic assessments will be stored  
 2663 in a secure, password protected website. The recordings themselves will be encrypted.

2664 Only designated study personnel will have access to identifiable, study specific, private information  
 2665 about human subjects. When registering on the TOP system, as required by PsychBC's standard  
 2666 operating procedures, both patients and therapists are assigned a random number code that links all  
 2667 subsequent assessments and is separated from identifiable information. This random number code will  
 2668 function as each participant's study code and will be used to link participants' data. As noted, all  
 2669 therapist and patient data (outside of diagnostic assessment summaries and the TOP administrations)  
 2670 will be collected through a web-based platform. The assigned participant code will be used to  
 2671 link/aggregate information, so private information will not be requested after the baseline  
 2672 assessment/consent process. Only the PI and essential research staff will have access to the list that  
 2673 links identifiable information with the participant's study code. Any audio recordings will be encrypted  
 2674 and password protected. Only the Co-PIs will know this password and have the capacity to access the  
 2675 recordings. When it is time to analyze the recordings for reliability coding, designated, trained RAs  
 2676 will also have access to the recordings; however, they will not have access to additional identifiable  
 2677 information (only the information required to complete the analysis). For any data used for research  
 2678 and publication purposes, the confidentiality of participant information will be ensured.

### 2682 b. If information derived from the study will be provided to a government agency, or any other 2683 person or group, describe to whom the information will be given and the nature of the 2684 information.

2685 The PI is required to submit information (i.e., contractual "deliverables") on a regular basis to PCORI  
 2686 (the study sponsor), including IRB protocols, interim progress reports, advisory board meeting  
 2687 minutes, engagement plan updates, evidence of diagnostic criterion reliability from training cases,  
 2688 interim data reports, presentation abstracts and documentation of acceptance, manuscript copies, letters  
 2689 of endorsement from scientific and consumer groups, final data analysis summary, and final research  
 2690 report. Details on deliverables are available in the aforementioned (and attached and updated)  
 2691 milestone schedule. No PHI will be transmitted to PCORI.

### 2692 c. Specify where and under what conditions study data will be kept, how specimens will be labeled 2693 and stored (if applicable), who has access to the data and specimens, and what will be available 2694 to whom.

2695 As noted, minimal paper forms (e.g., diagnostic summary forms) will be kept in a locked cabinet in the  
 2696 PI's locked Psychotherapy Research Lab. There will be no hard copy research-only data collected at  
 2697  
 2698

2699 the PsychBC sites. Virtually all of the data collected in this study (including consent) will be through a  
 2700 secure, web-based platform using a tablet or computer. Digital recordings of diagnostic assessments  
 2701 will be stored in a password protected website, and securely deleted by the project contract's term date.  
 2702 Only the relevant members of the research team will have access to the participants' data and only the  
 2703 PI will have long-term access to identifiable information. As noted, all assessments will be linked with  
 2704 a participant code. Any records linking the code to the participant's name or voice recording will be  
 2705 kept in a separate locked file cabinet in the PI's office. These records will be destroyed 5 years after  
 2706 the contract term date.  
 2707

## 2708 8. Potential Conflict of Interest

- 2709
- 2710 a. **Do any of the involved investigators or their immediate family (as described below) have**  
 2711 **consulting arrangements, management responsibilities or equity holdings in the Sponsoring**  
 2712 **company, vendor(s), provider(s) of goods, or subcontractor(s)? Y**
- 2713
- 2714 b. **Do any investigators or their immediate family have any financial relationship with the**  
 2715 **Sponsoring company, including the receipt of honoraria, income, or stock/stock options as**  
 2716 **payment? N**
- 2717
- 2718 c. **Is any Investigator(s) a member of an advisory board with the Sponsoring company? N**
- 2719
- 2720 d. **Do any investigators receive gift funds from the Sponsoring company? N**
- 2721
- 2722 e. **Do any investigators or their immediate family have an ownership or royalty interest in any**  
 2723 **intellectual property utilized in this protocol? Y**

2724

2725 “Immediate family” means a spouse, dependent children as defined by the IRS, or a domestic partner. If  
 2726 one or more of the above relationships exist, please include a statement in the consent form to disclose this  
 2727 relationship. i.e., a paid consultant, a paid member of the Scientific Advisory Board, has stock or stock  
 2728 options, or receives payment for lectures given on behalf of the sponsor. The consent form should disclose  
 2729 what institution(s) or companies are involved in the study through funding, cooperative research, or by  
 2730 providing study drugs or equipment. If you answer yes to any of the questions above, please go to the  
 2731 policies for more information.  
 2732

## 2733 9. Informed Consent

2734

2735 You can add different Consent Forms, Alteration Forms, and Waivers. Provide consent process background  
 2736 information, in the table below, for each Consent Form(s), Alteration Form(s), and Waiver(s).  
 2737

### 2738 9.1. Consent Form – therapist consent form revised

2739

2740 **Who is obtaining consent? The person obtaining consent must be knowledgeable about the study and**  
 2741 **authorized by the PI to consent human subjects.**

2742 UMass personnel only: either the PC or an RA.

2743

2744 **How is consent being obtained?**

2745 Therapists will meet or speak via teleconference with the UMass PC or an RA to learn about the study  
 2746 details/procedures and to provide formal consent through an online baseline survey to which they will be  
 2747 directed.  
 2748

2749 **What steps are you taking to determine that potential subjects are competent to participate in the**  
 2750 **decision-making process?**

2751 The PI and his collaborators will provide close oversight of the entire protocol, including regular  
 2752 consultations with a study Advisory Board and the DSMB.  
 2753

### 2754 9.2. Consent Form – therapist exit interview supplemental consent form

2755  
2756 **Who is obtaining consent? The person obtaining consent must be knowledgeable about the study and**  
2757 **authorized by the PI to consent human subjects.**

2758 The exit interviewer (i.e., RA or advisory board member).

2759  
2760 **How is consent being obtained?**

2761 If a therapist agrees to engage in an exit interview, the interviewer will review the study details/procedures  
2762 and obtain supplemental consent through an online link to which the therapist will be directed. Coercion  
2763 will be minimized by clearly stating that participation is voluntary.

2764  
2765 **What steps are you taking to determine that potential subjects are competent to participate in the**  
2766 **decision-making process?**

2767 If the interviewer interacts with a therapist who appears to have competency issues in the decision-making  
2768 process for engaging in the exit interview, they will immediately bring this concern to the PI or a Co-PI  
2769 before enrolling them. The team will then make an informed decision as to whether to include that person  
2770 in the interview protocol.

2771  
2772 **9.3. Consent Form – patient consent form revised**

2773  
2774 **Who is obtaining consent? The person obtaining consent must be knowledgeable about the study and**  
2775 **authorized by the PI to consent human subjects.**

2776 UMass personnel only: either the PC or an RA.

2777  
2778 **How is consent being obtained?**

2779 If a patient agrees to engage in a consent/baseline assessment session, the PC will schedule a telephone  
2780 diagnostic interview with a trained graduate clinical psychology RA (employed at either UMass or  
2781 University at Albany). The RAs will first review the study details/procedures and obtain consent through an  
2782 online baseline survey to which the patient will be directed. Coercion will be minimized by clearly stating  
2783 that participation is voluntary and will in no way impact the patient's treatment.

2784  
2785 **What steps are you taking to determine that potential subjects are competent to participate in the**  
2786 **decision-making process?**

2787 Competency for making one's own treatment decisions will be an inclusion criterion for the study.  
2788 Moreover, if a clinic staff member, the PC, or an RA interacts with a patient who appears to have  
2789 competency issues in the decision-making process for engaging in the study, they will immediately bring  
2790 this concern to the PI or a Co-PI before enrolling them. The team will then make an informed decision as to  
2791 whether to include that person in the study. The DSMB will be consulted if appropriate.

2792  
2793 **9.4. Consent Form – patient exit interview supplemental consent form**

2794  
2795 **Who is obtaining consent? The person obtaining consent must be knowledgeable about the study and**  
2796 **authorized by the PI to consent human subjects.**

2797 The exit interviewer (i.e., RA or advisory board member).

2798  
2799 **How is consent being obtained?**

2800 If a patient agrees to engage in an exit interview, the interviewer will review the study details/procedures  
2801 and obtain supplemental consent through an online link to which the patient will be directed. Coercion will  
2802 be minimized by clearly stating that participation is voluntary and will in no way impact the patient's  
2803 treatment.

2804  
2805 **What steps are you taking to determine that potential subjects are competent to participate in the**  
2806 **decision-making process?**

2807 Competency for making one's own treatment decisions will have been an inclusion criterion for the main  
2808 study. Moreover, if the interviewer interacts with a patient who appears to have competency issues in the  
2809 decision-making process for engaging in the exit interview, they will immediately bring this concern to the

2810 PI or a Co-PI before enrolling them. The team will then make an informed decision as to whether to include  
 2811 that person in the interview protocol. The DSMB will be consulted if appropriate.  
 2812

2813 **10. Assent Background**  
 2814

2815 All minors must provide an affirmative consent to participate by signing a simplified assent form, unless the  
 2816 Investigator(s) provides evidence to the IRB that the minor subjects are not capable of assenting because of age,  
 2817 maturity, psychological state, or other factors.  
 2818

2819 **11. Attachments**  
 2820

| Document Type              | Document Name                                                      | Attached Date |
|----------------------------|--------------------------------------------------------------------|---------------|
| Questionnaires             | Patient Phase 2<br>During-Treatment Measures<br>Packet             | 10/04/2016    |
| Questionnaires             | Therapist Phase 2<br>During-Treatment Measures<br>Packet           | 10/04/2016    |
| Questionnaires             | TOP-STP                                                            | 10/04/2016    |
| Questionnaires             | Stakeholder Exit Interview<br>Protocols                            | 10/04/2016    |
| Federal Grant/Sub-contract | PCORI IHS-1503-<br>28573_Constantino_executed contract             | 10/04/2016    |
| Federal Grant/Sub-contract | PCORI Original Contract<br>Proposal_all sections                   | 10/04/2016    |
| Other                      | Constantino Lab Personnel<br>Link- Google Docs                     | 10/04/2016    |
| Other                      | PCORI_Phase 2_Patient Data<br>Collection Email Template            | 11/13/2016    |
| Other                      | PCORI_Phase 2_Patient Data<br>Collection Reminder Call<br>Script   | 11/13/2016    |
| Other                      | PCORI_Phase 2_Therapist<br>Data Collection Email<br>Template       | 11/13/2016    |
| Other                      | PCORI_Phase 2_Therapist<br>Data Collection Reminder Call<br>Script | 11/13/2016    |
| Questionnaires             | MINI 7.0.2 Standard                                                | 11/13/2016    |
| Advertisements             | PCORI_Clinician<br>Recruitment_Verbal<br>Script_REVISED_clean      | 08/13/2017    |
| Advertisements             | PCORI_Clinician<br>Recruitment_Email_REVISED_clean                 | 08/13/2017    |
| Advertisements             | PCORI_Patient<br>Recruitment_Verbal<br>Script_REVISED_clean        | 08/13/2017    |
| Questionnaires             | PCORI_Clinician Consent &<br>Baseline Measures<br>Packet_REVISED   | 08/13/2017    |
| Questionnaires             | PCORI_Patient Consent &<br>Baseline Measures<br>Packet_REVISED     | 08/13/2017    |
| Questionnaires             | PCORI_Patient Posttreatment<br>Measures Packet_REVISED             | 08/13/2017    |

|                            |                                                                                   |            |
|----------------------------|-----------------------------------------------------------------------------------|------------|
|                            | w. debriefing form                                                                |            |
| Questionnaires             | PCORI_Clinician<br>Posttreatment Measures<br>Packet_REVISED w.<br>debriefing form | 08/13/2017 |
| Questionnaires             | TOP-CS & TOP-CM                                                                   | 08/13/2017 |
| Other                      | PCORI_Targeted Enrollment<br>Tables_REVISED_clean                                 | 08/13/2017 |
| Other                      | PCORI Milestone<br>Schedule_REVISED                                               | 08/13/2017 |
| Other                      | Participant Flow_REVISED                                                          | 08/13/2017 |
| Other                      | Data Collection Schedule<br>Revised                                               | 08/13/2017 |
| Federal Grant/Sub-contract | Constantino_IHS1503-28573_Mod<br>001 SUB_FE 20170808_FINAL<br>EXECUTED MOD        | 08/13/2017 |
| Other                      | PCORI IRB Proposal_R1_for<br>PsychBC_FINAL submitted                              | 08/13/2017 |
| Other                      | ORI-PBC_Business Associate<br>Agreement                                           | 08/13/2017 |

2821  
2822  
2823  
2824  
2825  
2826  
2827  
2828  
2829  
2830  
2831  
2832  
2833  
2834  
2835  
2836  
2837  
2838  
2839  
2840  
2841  
2842

### **Obligations**

Obligations of the Principal Investigator are: Modifications - Changes in any aspect of the study (for example, project design, procedures, consent forms, advertising materials, additional key personnel or subject population) will be submitted to the IRB for approval before instituting the changes; Consent Forms - All subjects will be given a copy of the signed consent form. Investigators will be required to retain signed consent documents for six (6) years after close of the grant or three (3) years if unfunded; Training - Human subject training certificates, including those for any newly added personnel, will be provided for all key personnel; Adverse Events - All adverse events occurring in the course of the protocol will be reported to the IRB as soon as possible, but not later than ten (10) working days; Continuing Review – IRB Protocol Report Forms will be submitted annually at least two weeks prior to expiration, six weeks for protocols that require full review; Completion Report - The IRB will be notified when the study is complete. To do this, complete the IRB Protocol Report Form and select “Final Report.” Training - Human subject training certificates, including those for any newly added personnel, will be provided for all key personnel; Adverse Events/Unanticipated Problems - All events occurring in the course of the protocol will be reported to the IRB as soon as possible, but not later than five (5) working days; Continuing Review - IRB Protocol Report Forms will be submitted annually at least two weeks prior to expiration, six weeks for protocols that require full review; Completion Report - The IRB will be notified when the study is complete. To do this, complete the IRB Protocol Report Form and select “Final Report.”

**The Principal Investigator has read and agrees to abide by the above obligations. Y**

2843 **Summary of a formal modification to the PCORI contract (September 2018), and the full**  
 2844 **revised study protocol (1<sup>st</sup> revision) submitted to, and approved by, the University of**  
 2845 **Massachusetts Amherst Institutional Review Board (March 2018)**  
 2846

2847 **CONTRACT MODIFICATION SUMMARY**  
 2848

2849 On September 14, 2018, PCORI approved a contract modification to IHS-1503-28573, which included the following  
 2850 changes – all in the service of boosting patient recruitment and retention:  
 2851

- 2852 • We increased the number of PsychBC telephone intake specialists who were trained to recruit and assign  
 2853 study patients. This increased the number of potential patients who could be recruited to the study on any  
 2854 given day.  
 2855
- 2856 • We revised the language of the study script/pitch that the PsychBC telephone intake specialists used to  
 2857 recruit patients. This revision better emphasized how completing a routine outcome measure was already  
 2858 standard practice at PsychBC, and how completing such a measure at intake could improve a patient's  
 2859 quality of care through personalized matching to providers. This immediately normalized the measurement  
 2860 process as part of usual care, and it highlighted personalized care over participant burden. In fact, the entire  
 2861 first part of the recruitment pitch had to do with clinical care; the introduction of the study came after, and  
 2862 it was billed as an opportunity to be part of an ongoing project on this personalized care notion and to earn  
 2863 financial compensation for doing so.  
 2864
- 2865 • PsychBC began offering periodic incentives (in the form of a payment bonus or tickets to local events) to  
 2866 the intake specialist who successfully directed the most patients to our online study consent form in a given  
 2867 period of time (e.g., a 1-week competition). This bonus was completely unrelated to the project budget; it  
 2868 was a motivational strategy within their own payroll system.  
 2869
- 2870 • We started offering a \$15 recruitment incentive. This compensation incentivized patients' willingness to  
 2871 leave the initial intake call to review the study consent form. We felt that this would be useful given that a  
 2872 high percentage of people were enrolling *if* they reviewed the materials. However, getting potential  
 2873 participants to agree to review the form was an early challenge.  
 2874
- 2875 • We eliminated the diagnostic interview calls (using the M.I.N.I.), as these assessments were providing little  
 2876 yield and may have been perceived as off-putting and burdensome. In practice, many early patients who  
 2877 enrolled in the study were failing to keep their baseline telephone assessment appointment with our  
 2878 research assistants. Although we regularly followed up to reschedule, we feared that these potentially  
 2879 burdensome assessments were posing a risk to retention. Moreover, even if it was not leading to a patient  
 2880 dropping out of the study, many enrolled patients were completing all assessments *other than* the M.I.N.I.,  
 2881 which was resulting in missing data regardless. We also wondered whether when people read the consent  
 2882 form and saw that we were asking them to engage in two 30-minute phone calls in addition to completing  
 2883 measures, this may have deterred them from enrolling. Thus, given the limited yield (at best) and overt  
 2884 disruption (at worst) of the diagnostic interview, we dropped it from our protocol. Fortunately, the data  
 2885 were never intended to be primary, and we could still characterize our sample with the TOP data (our  
 2886 primary match and outcome measure). Further, the diagnostic assessments were not included in PsychBC's  
 2887 standard intake process (as they were with our former clinical partner). Thus, using them actually rendered  
 2888 our study less naturalistic vis-à-vis the system that we were trying to affect/improve with our intervention.  
 2889
- 2890 • PsychBC hired a full-time employee whose sole job description was to recruit patients to the trial.  
 2891
- 2892 • Our PsychBC collaborator, Tom Swales, who holds a significant amount of regional credibility, agreed to  
 2893 liaise with community physicians to market the study, which they could then mention to their patients prior  
 2894 to them contacting PsychBC. We suspected that the more patients were in the know about the project prior  
 2895 to calling or arriving for care, the more likely they would agree to take part vs. view it as an unexpected  
 2896 inconvenience.  
 2897

- 2898 • We posted a special announcement about the study on PsychBC’s website, with the idea that it might  
2899 predispose patients to participate if they read about the potential personal benefits before the intake call.  
2900
- 2901 • We raised the upper age limit of study-eligible patients to 70 instead of 65. The literature does not  
2902 demarcate older adulthood at 65, so we felt that raising the age would have no untoward effect on response  
2903 to treatment.  
2904
- 2905 • We continued to monitor PsychBC therapists who were not enrolled in the study, but now had the requisite  
2906 number of baseline cases with TOP data for which we could establish a baseline report card. This would  
2907 allow us to recruit from this pool if there was employment turnover from study-enrolled clinicians, or if  
2908 other strategic needs arose (e.g., if having more therapists at a particular site could also positively affect  
2909 patient recruitment and retention).  
2910
- 2911 • The project’s milestone schedule was unrevised for this contract modification.  
2912

2913 For this modification, the only *major* changes to the protocol included the recruitment incentive and increase in the  
2914 upper patient age limit, which our funder, PCORI, had already suggested and verbally approved in March 2018.  
2915 Thus, at that time, we submitted the following 2<sup>nd</sup> (and minor) revision of our study protocol to the UMass IRB,  
2916 which was approved in March 2018. This was the final protocol in place for the remainder, and majority, of the  
2917 study. (Note that the protocol still references the diagnostic interviewing component, as that study element was not  
2918 jettisoned until September 2018, as per the contract modification details noted above.)  
2919

2920 **PROTOCOL**  
2921 **APPLICATION FORM**  
2922 **SOCIAL, BEHAVIORAL, AND EDUCATIONAL FULL BOARD**  
2923 **HUMAN SUBJECTS IN SOCIAL, BEHAVIORAL, AND EDUCATIONAL**  
2924 **RESEARCH**  
2925

2926 **University of Massachusetts Amherst (UMass)**  
2927 **Institutional Review Board (IRB)**  
2928

2929 **Protocol ID:** 2016-3401

2930 **Title:** Enhancing Mental Health Care  
2931

2932 **Revision Form**

2933 **1. Summarize the proposed changes to the protocol in lay terms (including details of ALL**  
2934 **changes proposed AND modify all relevant protocol sections and attachments accordingly).**

2935 By way of a brief reminder, subjects in the current study include two mental health care stakeholder groups: (1)  
2936 therapists affiliated with Psychological and Behavioral Health Consultants (PsychBC) who are providing outpatient  
2937 psychotherapy, and (2) adult patients receiving psychotherapy (for varied mental health complaints) from the  
2938 participating PsychBC therapists. PsychBC is a formal subcontract to UMass on this project, and their role on this  
2939 project is restricted to providing the research team access to these two subject populations, and assisting the team in  
2940 recruitment. Thus, PsychBC is not engaged in human subjects’ research. The amendment proposed here deals solely  
2941 with patient recruitment procedures. There are no changes to the research protocol itself.  
2942

2943 Specifically, we are behind in our recruitment milestones, and our funder, PCORI, has asked us to consider  
2944 strategies for increasing recruitment. In response, and internal to their business, PsychBC has provided additional  
2945 resources to help boost recruitment. For example, they have devoted more intake staff to accept calls and to pitch the  
2946 study via our verbal recruitment scripts. We initially rolled out the recruitment via just one of several intake call  
2947 lines in order to work closely with just one PsychBC staff member. This, however, limited the number of potential  
2948 patients to be recruited during a given day; opening up multiple lines for recruitment should help increase our  
2949 numbers. PsychBC has also implemented a financial bonus for the intake worker who successfully recruits the most  
2950 patients. We appreciate PsychBC’s active role in attempting to bump recruitment; however, our PCORI Program  
2951 Officer is concerned that these internal resources changes might not be sufficient on their own. Hence the present  
2952 proposed amendment.  
2953



2954 For context, at present, more PsychBC patients than we anticipated simply decline to learn more about the study  
 2955 during their initial intake call, presumably because they are eager to be assigned to a clinician immediately on that  
 2956 initial call vs. going to a website to read about the study, to consent, to complete baseline measures, and then to  
 2957 return to a second intake call to be assigned to their clinician. Although we have successfully recruited 40 patients at  
 2958 present, with data to support that people are generally willing to participate if they agree to access the study  
 2959 information/consent form, we need to increase the number of people agreeing to access our online study consent  
 2960 form in order to catch up to our recruitment milestone projections (currently set at 66 patients recruited by March 1,  
 2961 and 112 by April 15).

2962  
 2963 The proposed strategy, which was recommended by our Program Officer, is to provide a monetary incentive for  
 2964 patients to agree to review our study materials online vs. declining outright on the initial intake call. PCORI has  
 2965 worked with research teams in the past who have used this strategy to successful effect, and they are willing to help  
 2966 us re-work our budget if the IRB approves this recruitment incentive. Our rationale is that a small monetary  
 2967 incentive may have a big impact in getting people to agree to pause momentarily their intake process to learn about,  
 2968 and consent to, our study (as noted, once patients get to the consent form, they often agree to participate). Given that  
 2969 reading the consent form takes several minutes, and that the person has to be willing to have their intake process  
 2970 span two different calls (which can delay by minutes to hours their assignment to a PsychBC therapist), we think  
 2971 that it is reasonable to compensate potential participants \$15 for this time added to the intake process. As noted,  
 2972 because this money is tied to recruitment only, not participation, it is squarely a recruitment incentive, not a  
 2973 participant compensation/payment (for which a compensation schedule already exists in the current protocol).  
 2974 Although PCORI originally suggested offering \$25, as did our DSMB and Advisory Board when consulting them  
 2975 about our recruitment issue, we feel that this might end up being a disincentive to actually participate (i.e., a person  
 2976 may be content with earning \$25 simply to read a consent form, but then say “no thanks” to participating). Instead,  
 2977 we think that offering enough to be an incentive, but an amount that is more proportional to the time ask and to the  
 2978 compensation being offered for engaging in the full study protocol (i.e., \$50), is likely to be more effective.  
 2979

2980 In sum, we are asking for approval to offer a \$15 recruitment incentive to access our study consent form. We are  
 2981 also increasing the upper age limit of patients from 65-70. As the literature does not demarcate older adulthood at  
 2982 65, this change is very minor, but *might* allow us to recruit a few extra patients who are interested in participating.  
 2983 There are no new attachments or other revisions to the study protocol language for this proposed amendment, and  
 2984 this recruitment incentive incurs no additional risk to potential participants.  
 2985

2986 **2. Indicate Level of Risk involved with the changes proposed.**  
 2987 No change.

2988  
 2989 **3. Describe any Other Changes.**  
 2990 As our funder is eager to learn if we can implement this recruitment incentive, I can be available to talk during your  
 2991 meeting on 3/7 if questions arise. My cell phone is 413-320-5752. Thank you!  
 2992

2993 **Protocol Director:** Michael J. Constantino

2994 **Degree:** PhD

2995 **Title:** Professor

2996 **Department Name:** Psychological & Brain Sciences

2997 **Mailing Address:** 612 Tobin Hall, 135 Hicks Way

2998 **Phone:** 5-1388; **Fax:** 5-0996

2999 **E-mail:** mconstantino@psych.umass.edu

3000 **Human Subjects Training Completed?** yes

3001

| Subject Populations(s) Checklist                | Yes/No |
|-------------------------------------------------|--------|
| Minors (under 18)                               | N      |
| Pregnant Women                                  | N      |
| Cognitively Impaired or Decisionally Challenged | N      |
| Older individuals (75 and over)                 | N      |
| Healthy Volunteers                              | N      |
| Students/Employees                              | N      |

|                                                          |   |
|----------------------------------------------------------|---|
| International Populations                                | N |
| Prisoners                                                | N |
| Other (i.e., any population that is not specified above) | Y |

3002  
3003  
3004  
3005  
3006  
3007  
3008  
3009

Other: Subjects will include two mental health care stakeholder groups: (1) therapists affiliated with PsychBC who are providing outpatient psychotherapy, and (2) adult patients receiving psychotherapy for varied mental health complaints from the participating therapists. PsychBC, a formal subcontract to UMass on this project, is an innovative health care organization and one of the largest providers of outpatient mental healthcare services in Ohio. PsychBC's role on this project is restricted to providing the research team access to these two subject populations, and assisting the team in recruitment. Thus, PsychBC is not engaged in human subjects' research.

**Study Location(s) Checklist** **Yes/No**

|                                       |   |
|---------------------------------------|---|
| University of Massachusetts Amherst   | Y |
| Baystate Medical                      | N |
| University Health Services            | N |
| Hartford Hospital                     | N |
| Other (Specify other Study Locations) | Y |

3010  
3011  
3012  
3013  
3014  
3015  
3016  
3017

Other: All study operations will be coordinated through Dr. Michael Constantino's (PI) Psychotherapy Research Lab at UMass Amherst. Subject data will be collected through our clinical partner, PsychBC, which employs a large team of psychiatrists, advanced practice nurses, psychologists, clinical counselors, and social workers serving children, adolescents, adults, and families in locations throughout Ohio and northern Kentucky. PsychBC's experienced specialists provide therapy for a wide range of mental health issues. PsychBC includes multiple treatment sites in Ohio that will contribute to data collection.

**General Checklist** **Yes/No**

|                                                        |   |
|--------------------------------------------------------|---|
| Training Grant?                                        | N |
| Funded Study (or proposal submitted to sponsor)?       | Y |
| Cooperating Institution(s)?                            | Y |
| Federally Sponsored Project?                           | Y |
| Human blood, cells, tissues, or body fluids (tissues)? | N |
| Subjects will be paid for participations?              | Y |

3018  
3019  
3020  
3021  
3022  
3023  
3024

Cooperating Institution(s): (1) University at Albany, SUNY (Dr. James Boswell; Co-PI and subcontract); (2) Outcome Referrals Institute, Inc. (ORI; Dr. David Kraus; Co-PI and subcontract); and (3) PsychBC (Dr. Tom Swales; subcontract director). Note: At the time of this revision, an IAA has already been established for the approved original protocol with SUNY Albany and ORI. After consulting with UMass IRB staff, it is now clear that our new subcontract, PsychBC, is not engaged in human subjects' research; thus, no IAA is required/requested.

**Funding Checklist**

**Grants/Contracts:**

3025  
3026  
3027  
3028  
3029  
3030  
3031  
3032  
3033  
3034  
3035

**Funding Administered By:** UNIVERSITY  
**PGCA#:** 1503-28753  
**GAID#:**  
**Funded By:** Patient-Centered Outcomes Research Institute  
1828 L Street, NW, Suite 900  
Washington, DC 20036  
Phone: (202) 827-7700 | Fax: (202) 355-9558  
info@pcori.org

**Principle Investigator:** Michael J. Constantino

**Grant/Contract Title:** Enhancing Mental Health Care by Scientifically Matching Patients to Providers' Strengths

3036  
3037  
3038  
3039

**Are the contents of this protocol the same as described in grant/contract proposal?** Y

3040 **Is this a training grant?** N

3041 **Are any subcontracts issues under this grant?** Y

3042

3043 **Fellowships** – None

3044 **Gift Funding** – None

3045 **Dept. Funding** – None

3046 **Other Funding** – None

3047

## 3048 **1. Purpose of the study**

3049

### 3050 **a. Provide a brief lay summary of the purpose of the study.**

3051 Research has shown that mental health care (MHC) providers differ significantly in their ability to help  
3052 patients. In addition, providers demonstrate different patterns of effectiveness across symptom and  
3053 functioning domains. For example, some providers are reliably effective in treating numerous patients  
3054 and problem domains, others are reliably effective in some domains (e.g., depression, substance abuse)  
3055 yet appear to struggle in others (e.g., anxiety, social functioning), and some are reliably ineffective, or  
3056 even harmful, across patients and domains. Knowledge of these provider differences is based largely  
3057 on patient-reported outcomes collected in routine MHC settings.

3058

3059 Unfortunately, provider performance information is not systematically used to refer or assign a  
3060 particular patient to a scientifically based best-matched provider. MHC systems continue to rely on  
3061 random or purely pragmatic case assignment and referral, which significantly “waters down” the odds  
3062 of a patient being assigned/referred to a high performing provider in the patient’s area(s) of need, and  
3063 increases the risk of being assigned/referred to a provider who may have a track record of  
3064 ineffectiveness. This research aims to solve the existing non-patient-centered provider-matching  
3065 problem.

3066

3067 Specifically, we aim to demonstrate the comparative effectiveness of a scientifically-based patient-  
3068 provider match system compared to status quo pragmatic case assignment. We expect in the scientific  
3069 match group significantly better treatment outcomes (e.g., symptoms, quality of life) and higher patient  
3070 satisfaction with treatment. We also expect to demonstrate feasibility of implementing a scientific  
3071 match process in a community MHC system and broad dissemination of the easily replicated scientific  
3072 match technology in diverse health care settings. The importance of this work for patients cannot be  
3073 understated. Far too many patients struggle to find the right provider, which unnecessarily prolongs  
3074 suffering and promotes health care system inefficiency. A scientific match system based on routine  
3075 outcome data uses patient-generated information to direct this patient to this provider in this setting. In  
3076 addition, when based on multidimensional assessment, it allows a wide variety of patient-centered  
3077 outcomes to be represented (e.g., symptom domains, functioning domains, quality of life).

3078

### 3079 **b. What does the Investigator(s) hope to learn from the study?**

3080 The goal of this project is to test the effectiveness of an innovative, scientifically-informed patient-  
3081 therapist referral match algorithm based on MHC provider outcome data. We will employ a  
3082 randomized controlled trial (RCT) to compare the match algorithm with commonplace pragmatic  
3083 referral matching (based on provider availability, convenience, or self-reported specialty).  
3084 Psychosocial treatment will remain naturalistically administered by varied providers (e.g.,  
3085 psychologists, social workers) to patients with mental health concerns. We hypothesize that the  
3086 scientific match group will outperform the pragmatic match group in decreasing patient symptoms and  
3087 treatment dropout, and in promoting patient functional outcomes, perceived treatment credibility,  
3088 outcome expectation, and care satisfaction, as well as therapeutic alliance quality. Doing so will  
3089 establish the match algorithm as a mechanism of effective patient-centered MHC, and will suggest that  
3090 this scientifically derived patient-provider matching intervention can be integrated into MHC systems  
3091 to aid in treatment decision making, as well as increase personalization.

3092

## 3093 **2. Study Procedures**

3094

### 3095 **a. Describe all study procedures.**

3096 We will compare the efficacy of naturalistic treatment either with or without the aid of scientific  
 3097 matching to a provider with a double-blind RCT. The project will involve two main phases. First, we  
 3098 will access a naturalistic baseline assessment of consenting PsychBC therapists' performance to  
 3099 determine their relative strengths and weaknesses in treating the problem domains measured by a  
 3100 multidimensional outcome tool. This period will establish our therapist sample pool and inform the  
 3101 RCT match manipulation (a match will represent a patient being assigned to a therapist who has  
 3102 empirically demonstrated during the baseline phase that he or she is stably effective at treating patients  
 3103 with the same type of presenting complaint).

3104  
 3105 Second, and after the baseline period, new consenting outpatients will be randomly assigned to the  
 3106 match (experimental) or no match (control) condition. The PsychBC administrators and their project-  
 3107 specific coordinator will collaborate with the research team to apply the randomization protocol.  
 3108 Treatment outcome will be assessed through the patient's actual termination point or 16 weeks,  
 3109 whichever comes sooner (we will also conduct a follow-up outcome assessment at 1 year after the  
 3110 point of termination on a randomly selected subsample). Outside of being matched to a therapist from  
 3111 a short-list of providers who have demonstrated (during the phase 1 baseline) reliable success in  
 3112 treating the patient's primary problem area, and completing study-specific measures for which  
 3113 participants will receive monetary compensation, treatment will be delivered as usual (the short list  
 3114 still allows for pragmatic considerations like availability and administrator assignment options).

3115  
 3116 Additional methodological details by study phase follow.

3117  
 3118 Phase 1: The most significant revision to the research protocol is that we no longer need to  
 3119 recruit/enroll patients for phase 1. Rather, phase 1 now focuses solely on PsychBC clinicians as our  
 3120 research participants. To inform the match condition, we will first establish the baseline track record of  
 3121 participating therapists' performance (across a minimum of 15 adult psychotherapy cases each) to  
 3122 determine their strengths in treating behavioral health domains measured by the primary outcome  
 3123 measure on which the match algorithm is based – the Treatment Outcome Package (TOP; Kraus,  
 3124 Seligman, & Jordan, 2005), which is described below in the listing of relevant phase 1 attachments to  
 3125 this protocol. Developed and processed by our Co- PI (Dr. Kraus) and his subcontractor company,  
 3126 Outcome Referrals, Inc. (ORI), the TOP is administered routinely as a core element of the PsychBC  
 3127 care model. That is, PsychBC already has an executed business agreement with ORI to have their  
 3128 patients complete the TOP as part of their standard clinical routine. Thus, we can leverage  
 3129 the existing PsychBC infrastructure to support the present study with little to no extra burden on  
 3130 administrators, providers, and patients. Moreover, although patient data are part of this baseline phase,  
 3131 they are protected within the business agreement between ORI and PsychBC, and the agreement  
 3132 allows for these coded data to be used to establish therapists' performance "report cards." So, to  
 3133 reiterate, patient TOP data are collected as part of standard operating procedure for PsychBC. At this  
 3134 stage, we are not collecting these patient data as a research protocol; rather, these coded patient data  
 3135 points (i.e., clinical care data points) inform our match intervention (by establishing therapist  
 3136 performance report cards across at least 15 cases) that is at the heart of phase 2 (described below). In  
 3137 phase 1, we are only actively recruiting provider participants; thus, no patient protected health  
 3138 information (PHI) is transmitted to the research team.

3139  
 3140 Importantly, at the time of this proposed IRB revision, most PsychBC clinicians who will choose to  
 3141 participate in the study will already have baseline data on the minimum 15 adult cases (through the  
 3142 patient's actual termination point or 16 weeks, whichever comes sooner) to establish their track record.  
 3143 In these cases, we simply need to enroll the therapist in the study (as discussed next). For therapists  
 3144 who wish to participate, but have yet to accumulate baseline performance data on the minimum 15  
 3145 cases, we will track their performance (as per the TOP) on new, consecutive referrals until 15 total  
 3146 cases have been established for which the patient has either terminated or has been seen for at least 16  
 3147 weeks. Few therapists will fall in this second category, and even if they do, they will generally only  
 3148 need a few cases to reach 15. Thus, we expect no issues completing the phase 1 performance baseline  
 3149 and finalizing the match algorithm for the phase 2 RCT by the established contractual milestone of  
 3150 10/1/17.  
 3151

3152 Our minimum target therapist sample is 44 PsychBC providers (all of whom will be over the age of 18  
3153 themselves, and treating patients within the age range of 18-65). Therapists will be psychologists,  
3154 clinical counselors, and social workers. Recruitment will be coordinated among our UMass-employed  
3155 project coordinator (PC), the PsychBC-employed PC, clinic staff members, and the Co-PIs.  
3156 Specifically, the PsychBC team will verbally present information about the study (both phases 1 and 2)  
3157 to their providers during staff meetings. Alternatively, this information can be presented through email.  
3158 At this preliminary recruitment stage, this information will be used to heighten awareness about the  
3159 study and to garner interest in participating. (The verbal script for staff meetings and the email text are  
3160 included as phase 1 attachments to this protocol.) The PsychBC PC will then provide the UMass PC  
3161 (via email) the names of providers who expressed interest in learning more about the study.  
3162

3163 The UMass PC will subsequently contact interested therapist participants via email or teleconference  
3164 (whichever is more convenient for the provider) to provide more study details/procedures and to direct  
3165 the provider to an online consent form and survey. Providers remaining interested will access the  
3166 secure study website to provide formal consent and to complete the baseline survey to which they will  
3167 be directed after consenting. Therapists will be told that the study is examining various referral  
3168 processes that will not affect their delivery of treatment-as-usual. They will be informed that they will  
3169 be blind to the specific nature of the referral manipulation in phase 2, but will be fully debriefed  
3170 following the entire study and offered an opportunity to provide feedback on their experience.  
3171 Therapists will also be informed of the assessments in which their study patients will engage in both  
3172 phase 1 (which is standard practice) and phase 2 (though they will not have access to the phase 2  
3173 research data at any time). Therapists will also need to consent to completing the aforementioned  
3174 baseline survey prior to phase 1, as well as a few study-specific measures for each patient during the  
3175 phase 2 RCT (the baseline survey and the phase 2 attachments are described in the relevant sections  
3176 below and are included as phase 1 and 2 attachments, respectively, to this protocol). Relevant to phase  
3177 1, therapists will be compensated with a \$20 Amazon gift card for the one-time completion of the  
3178 online baseline survey, which will take no longer than 25 minutes to complete. Non-consenting  
3179 therapists will receive case assignments as per standard care protocol and will simply not be included  
3180 in the study (though we will analyze consenting and non-consenting therapists on demographic  
3181 differences to see if any systematic sample bias exists).  
3182

3183 Once therapists are enrolled in the study, the research team will access their naturalistically collected  
3184 TOP data to establish their performance across the minimum 15 cases to determine their personal  
3185 strengths in treating patients across the risk-adjusted mental health problem domains measured by the  
3186 TOP (recall that nothing changes in the therapist's service operation during this phase and, in fact,  
3187 most of these TOP data points will have already been processed through ORI for cases seen by the  
3188 providers in the past). Specifically, to establish therapists' performance track records, we will draw on  
3189 each relevant patient's coded TOP data from baseline, week 8, and their termination point or week 16,  
3190 whichever comes sooner (to mimic the definition of treatment outcome in the RCT phase discussed  
3191 below). To reiterate, the research team is not formally enrolling patients into phase 1 of the study;  
3192 rather, their coded data are simply processed by ORI, through its business agreement with PsychBC  
3193 and its subcontractor role in the current project, to inform participating therapist report cards and the  
3194 match algorithm).  
3195

3196 Note that enrolled therapists will have an already-established TOP ID. This will allow the research  
3197 team to link therapists' baseline survey data to their RCT data (i.e., responses to their own measures  
3198 and their participating patients' measures) without use of any identifying information. As per  
3199 customary precautions described below, a key that links therapist names and contract information with  
3200 their data code will be kept in a separate, secure file that only trained research personnel can access.  
3201

3202 Relevant phase 1 attachments to this protocol:

- 3203
- 3204 (1) Therapist recruitment materials: verbal script; email
  - 3205 (2) Therapist consent form and baseline phase 1 survey measures:
- 3206

3207 *Provider Characteristics Form (PCF)*. This measure was developed by the research team to assess  
 3208 therapist demographic information, clinical experience, degree type, percent time seeing various  
 3209 patient types/diagnoses, any specialty training they have received, and dimensional ratings of the  
 3210 influence of various theoretical orientations on their treatment approach.

3211  
 3212 *Therapist Perceived Strengths (TPS)*. This measure was developed by the research team to assess  
 3213 therapists' beliefs about their effectiveness in treating the various TOP domains when uninformed of  
 3214 their data-driven TOP track record. This measure will allow us to examine how accurate therapists are  
 3215 in perceiving their own strengths and weaknesses.

3216  
 3217 Phase 2: At this phase, the RCT will commence. The therapists will have already consented prior to  
 3218 phase 1 to be involved in the entire study, and they will know that patient data from their naturalistic  
 3219 baseline cases will have been used to create a personalized performance report card that will inform a  
 3220 prospective match with new patients they will treat in the trial. The therapists themselves will not see  
 3221 their report cards (as they will have been informed at the time of consent); rather, this information will  
 3222 be used by the research team with regard to the match manipulation.

3223  
 3224 Phase 2 marks the beginning of *patient* recruitment into the RCT. The patient population will be adult  
 3225 men and women (age 18-70) in PsychBC's referral stream (largely Cleveland clinic and primary care  
 3226 [PCP] practice). Recruitment to the study simply means a willingness to be randomized to condition  
 3227 based on TOP-derived presenting problem and to complete supplemental assessments (for monetary  
 3228 compensation, as per below) at baseline, at regular intervals during treatment, and at posttreatment. As  
 3229 this is an effectiveness design with a premium on ecological validity and scalability, virtually all  
 3230 patients in the PsychBC network will be eligible. It is most likely that the sample will be predominated  
 3231 by the following problem domains: depression, panic, substance abuse, and poor quality of life. The  
 3232 only study-related patient-level exclusion criterion will be patients who are not the primary, informed  
 3233 decision-maker for their care. Thus, patients will present with a multitude of presenting problems  
 3234 across a spectrum of *Diagnostic and Statistical Manual of Mental Disorders* (5th ed.; *DSM-5*<sup>48</sup>)  
 3235 diagnoses. Our minimum study target sample size is 264 patients (6 per therapist).

3236  
 3237 We do not anticipate problems meeting our recruitment numbers in the project time frame, as PsychBC  
 3238 schedules approximately 950 new patients per month. Moreover, their care model already uses the  
 3239 TOP to screen patients for appropriate level of care, and, as a formal subcontract on the project, they  
 3240 are willing to use a patient-level-best-matched clinician list that is generated in real time (based on the  
 3241 predictive validity of our match algorithm). Including the randomization protocol into the treatment  
 3242 delivery model will not create any systemic barriers.

3243  
 3244 Patients will flow into PsychBC via electronic or self-referrals. At initial contact, the PsychBC PC will  
 3245 ask patients for permission to be contacted by study personnel (i.e., the UMass PC) if they are  
 3246 interested in learning more about participation (this verbal script remains included as a phase 2  
 3247 attachment to this protocol). If they are, they will be asked by the PsychBC PC to sign an authorization  
 3248 agreement (included in the phase 2 consent form) to allow their contact information (name, email  
 3249 address, and phone number) to be shared with the research team. The PsychBC PC's role is restricted  
 3250 to this recruitment task and administration of authorization to release the limited PHI; thus, no  
 3251 PsychBC personnel will be engaged in human subjects' research.

3252  
 3253 The PsychBC PC will provide the UMass PC with a daily list of referrals who have provided signed  
 3254 authorization to be contacted about the study. The UMass PC will then contact eligible patients to  
 3255 schedule a baseline consent/assessment. If a patient agrees to engage in a consent/baseline assessment  
 3256 session, the PC will schedule a teleconference diagnostic interview via a secure platform with a trained  
 3257 graduate clinical psychology research assistant (RA). During this session, the RA will first review the  
 3258 study details/procedures and respond to any questions. Patients will be told that the study is examining  
 3259 various referral processes that will not affect their treatment; they will be kept unaware of the specific  
 3260 nature of the referral manipulation, but will be told that they will be fully debriefed following the study  
 3261 and offered an opportunity to provide feedback on their experience (via an exit interview). They will  
 3262 also be told that although their participation in the trial will largely mimic the same treatment that they

3263 would receive if they were not participating, they must consent to be randomized, complete extra  
3264 study-specific measures (before, during, and after treatment), complete an audio-recorded diagnostic  
3265 interview (before and after treatment), and accept assignment to a clinician who will deliver individual  
3266 psychotherapy. Patients will also be asked to remain with the same therapist through at least 16 weeks  
3267 of treatment; however, if they request a transfer earlier, this will be treated as a dropout point for the  
3268 sake of the trial.

3269  
3270 If a patient consents to be enrolled, they will sign the consent form and complete a baseline survey of  
3271 measures (i.e., the TOP-CR, TOP-CS, and TOP-CM, a brief measure of global distress, a measure of  
3272 existential isolation, and a measure of interpersonal problems, all described below in the listing of  
3273 relevant phase 2 attachments to this protocol) through a secure online platform linked to their typical  
3274 TOP administration. Next, the trained research assistant (RA) will administer (on the same individual  
3275 teleconference) the *M.I.N.I. 7.0.2 International Neuropsychiatric Interview* (described below in the  
3276 listing of relevant phase 2 attachments to this protocol). Following PsychBC's standard intake process  
3277 and this research-focused baseline consent/assessment session, patients will be randomized to  
3278 condition and assigned to a provider based on the experimental parameters of that condition (i.e.,  
3279 scientific match vs. pragmatic match). For their involvement in the additional diagnostic assessments  
3280 and the additional measures that they will complete during the active treatment phase, patients will be  
3281 compensated with a \$50 Amazon gift card (on a prorated schedule for any missed assessments).

3282  
3283 After the full baseline assessment, patients will be randomly assigned to condition (scientifically  
3284 informed matched vs. pragmatic match) with a participating PsychBC provider. The UMass PC will  
3285 generate the randomization sequences using an online random generator. Within condition, patients  
3286 will be assigned sequentially to the therapists until they reach their study quota of 6 patients. Patients  
3287 in the match condition will be assigned to therapists who have a demonstrated strength (derived from  
3288 the baseline period) in treating, at a minimum, the patient's highest self-reported distress domain on  
3289 the TOP-CS. Beyond the minimal match on the most elevated TOP-CS domain, our match algorithm  
3290 will attempt to match patients to therapists on as many TOP-CS dimensions as possible, ultimately  
3291 providing PsychBC with at least several well-matched choices for assignment within the match  
3292 condition. In order to preserve this level of choice, there will be natural variability in the number of  
3293 well-matched domains (some patients matched only on the minimum 1 TOP-CS domain, others  
3294 matched on 2 or more domains). The match variability across both conditions will allow us to measure  
3295 degree of match dimensionally as a moderator variable of our main treatment effect. Therapists will  
3296 also be unaware of their patient's treatment condition (double blind), and they will treat both matched  
3297 and non-matched patients (i.e., they will be crossed over the two conditions to minimize administrative  
3298 disruptions). In the low probability event that there is no therapist meeting minimal match criteria for a  
3299 patient in the match condition, that patient will be removed from the primary study analyses (though  
3300 will, of course, still be offered treatment-as-usual at the clinic) and replaced with the next patient  
3301 where a match does exist. As described in our power analysis below, we are oversampling in order to  
3302 account for these "dropouts," or removed data points.

3303  
3304 In addition to the baseline assessments already described, patients will be assessed via online surveys  
3305 at regular intervals during treatment (the secure ORI platform will email hyperlinks to these surveys  
3306 with reminders to complete them at the appropriate time intervals; the UMass PC can also follow-up  
3307 with phone calls if needed). These during-treatment assessments will include the TOP-CS and  
3308 measures of existential isolation and interpersonal problems at every odd-numbered week after the  
3309 start of treatment, as well as global distress, therapeutic alliance quality, perceived treatment  
3310 credibility, and outcome expectation after every even-numbered session (all measures of these  
3311 constructs are described below in the listing of relevant phase 2 attachments to this protocol). During  
3312 treatment, participating therapists will also be asked to complete their respective versions of the  
3313 alliance and credibility/expectation measures (also at even-numbered weeks; the UMass PC will email  
3314 hyperlinks to these online surveys with reminders to complete them at the appropriate time intervals;  
3315 the PC will also follow-up with phone calls if needed). For completing these measures, therapists will  
3316 be compensated \$50 per patient (again in the form of Amazon gift cards). All data collection will be  
3317 coordinated through ORI, for which patients and therapists are assigned unique codes. Through their

3318 business agreement, ORI has direct access to PBC medical records; thus, it can push the relevant  
3319 measures and track patient/therapist progress throughout the study.

3320  
3321 As reminder, in both conditions, the providers will deliver treatment naturalistically (i.e., with no  
3322 manipulation or influence from the research team). For the sake of the RCT, “treatment outcome” will  
3323 be considered the point at which treatment terminates, or 16 weeks, whichever comes sooner. After the  
3324 16<sup>th</sup> week, or the termination session if it comes sooner, patients will complete posttreatment measures:  
3325 the TOP-CS and TOP-CM, a measure of treatment satisfaction, a brief measure of global distress, a  
3326 measure of existential isolation, and a measure of interpersonal problems (all described below in the  
3327 listing of relevant phase 2 attachments to this protocol). Therapists will also document the nature of  
3328 termination (measure described below in the listing of relevant phase 2 attachments to this protocol).  
3329 Also at posttreatment, as defined by the trial, patients will undergo a repeat diagnostic telephone  
3330 assessment (i.e., an RA-administered M.I.N.I., as described above).

3331  
3332 We will also conduct a follow-up outcome assessment at 1 year after the patient’s own termination on  
3333 a randomly-selected subsample of 40 patients. Patients can easily be tracked in coordination with ORI  
3334 and PsychBC; further, patients will have provided consent for this follow-up contact (should they be  
3335 randomly chosen for it). At this assessment point, patients will again complete online the TOP-CS and  
3336 TOP-CM, the brief measure of global distress, the measure of existential isolation, and the measure of  
3337 interpersonal problems.

3338  
3339 Note that all self-report measures (for both patients and therapists) at all time-points will be completed  
3340 on Wi-Fi-connected tablets, or on home computers, through ORI’s secure web-based platform. The  
3341 TOP has its own dedicated website and HIPAA-compliant, secure server, and all other study-specific  
3342 measures will be integrated into the TOP administration process.

3343  
3344 We predict that the scientific match group will outperform the no match group to a clinically  
3345 significant degree on TOP outcomes, global symptomatology, and interpersonal problems. We also  
3346 expect that the match group will be more effective in promoting alliance quality and fostering more  
3347 positive patient perceptions of treatment credibility and outcome expectation, all of which are  
3348 established correlates (and candidate mechanisms) of positive treatment outcomes. Finally, we expect  
3349 there to be less patient dropout in the match condition, and higher patient treatment satisfaction.  
3350 Secondly, we will examine 4 potential moderators of the expected between-group treatment effects  
3351 on the primary TOP outcomes: (a) patient race (as it may be that the match algorithm is particularly  
3352 potent, and an important responsiveness tool, for historically understudied or underrepresented  
3353 patients), (b) degree of match of therapist strengths to patient problems (rated dimensionally as a ratio  
3354 given that therapists can be matched on more than just the minimum 1 domain, and the elimination of  
3355 harmful matches for any distressed domain reported by the patient), (c) patient distress severity, and  
3356 (d) complexity of patient presenting problem. Thus, we will test if matching is only, or particularly,  
3357 effective under the conditions of a central patient characteristic, a multiple domain match, and/or for  
3358 patients with the most severe or complex pathology. As noted, we will also assess therapists’ self-  
3359 perceived strengths on the TOP domains. We expect to replicate previous literature showing that  
3360 therapists are poor judges of their own efficacy, tending to underestimate negative effects and  
3361 overestimate positive effects with their patients (Lambert, 2011), which would further underscore the  
3362 importance of a data-driven match process.

3363  
3364 Finally, for a subsample of stakeholders, we will conduct post-trial exit interviews ( $N_s = 5$  patients, 5  
3365 therapists) to gather invaluable input on how to be responsive to the study findings in terms of  
3366 dissemination, implementation, and policymaking, including the potential importance of integrating  
3367 diagnosis, provider age, race, or gender into subsequent matching approaches. We will recruit  
3368 stakeholders in order of completion until we reach our target  $N_s$  (therapists can only be involved once  
3369 they have treated all 6 of their study patients). There are no other inclusion/exclusion criteria for the  
3370 exit interviews; we will simply stop asking if participants are interested once we have reached our  
3371 target  $N_s$ . This is consistent with the study consent forms, which clearly state that interested  
3372 participants may be selected to engage in the interview.

3373



3374 Fully reflecting stakeholder engagement, and to eliminate any biases or power dynamics introduced by  
 3375 the PIs or their research staff, Advisory Board members (with appropriate credentialing for working  
 3376 with human subjects) will conduct the individual interviews. The PIs (Constantino & Boswell) will  
 3377 train 3 Advisory Board members on qualitative interviewing, and each will administer 1-2 pilot  
 3378 interviews as part of the training, plus 5 study interviews. The interviews will be conducted and  
 3379 audiorecorded via a secure webconferencing service and will last approximately 45-60 minutes.  
 3380 Participants will be compensated with a \$100 Amazon gift card for their time. RAs will transcribe the  
 3381 interviews, removing any identifying patient information. These RAs will also conduct a qualitative  
 3382 analysis of these text-based data.

3383  
 3384 Relevant phase 2 attachments to this protocol:

- 3385  
 3386 (1) Patient phase 2 recruitment verbal script  
 3387 (2) Patient phase 2 consent form and phase 2 baseline measures packet:  
 3388

3389 *TOP-Consumer Registration Form* (TOP-CR; Kraus et al., 2005). The TOP-CR will be used routinely  
 3390 during the phase 1 baseline (and the phase 2 RCT) to assess patient demographics. On this form,  
 3391 patients indicate their age, gender, ethnicity, marital status, income level, employment status, religious  
 3392 identification, education level, general health status, and medical and mental health treatment history.  
 3393

3394 *TOP-Clinical Scales and Case Mix* (TOP-CS & TOP-CM; Kraus et al., 2005). This is the primary  
 3395 measure in our study; it will be used to establish the therapist report cards during the baseline phase to  
 3396 inform the match manipulation in phase 2. It also tracks patient outcomes. The TOP-CS consists of 58  
 3397 items assessing 12 symptom and functional (including strengths) domains (risk-adjusted for case mix  
 3398 variables assessed via 37 items on the companion TOP-CM, such as divorce, job loss, comorbidity):  
 3399 work functioning, sexual functioning, social conflict, depression, panic (somatic anxiety), psychosis,  
 3400 suicidal ideation, violence, mania, sleep, substance abuse, and quality of life. Global symptom severity  
 3401 is assessed by summing all items or by averaging the z-scores (i.e., standard deviation units relative to  
 3402 the general population mean) across each of the 12 clinical scales. Domain-specific symptom severity  
 3403 is quantified as the individual z-scores for each clinical scale using general population means and  
 3404 standard deviations for the conversion. The TOP-CS has been shown to have excellent factorial  
 3405 structure, as well as good test-retest reliability across all scales. It is sensitive to change while  
 3406 possessing limited floor and ceiling effects (Kraus et al., 2005). The TOP also has demonstrated good  
 3407 convergent validity with scales like the Beck Depression Inventory (Beck, Steer, & Brown, 1996) and  
 3408 the Brief Symptom Inventory (Derogatis, 1975).  
 3409

3410 *Symptom Checklist-10* (SCL-10; Rosen, Drescher, Moos, & Gusman, 1999). To evaluate outcome with  
 3411 an index separate from the TOP (to test convergence and enhance the validity of any between  
 3412 condition effects), we will also assess global distress with the SCL-10, a 10-item, well-validated and  
 3413 widely used self-report inventory that assesses psychological wellbeing.  
 3414

3415 *Existential Isolation Scale* (EIS; Pinel et al., 2014). To assess this isolation subtype, participants will  
 3416 complete the EIS, a six-item scale that requires participants to rate the extent to which they agree with  
 3417 items such as “I often have the same reactions to things as other people around me do” (reverse-coded)  
 3418 and “Other people usually do not understand my experiences” and “People often have the same ‘take’  
 3419 or perspective on things that I do” (reverse-coded). Participants respond using a 7-point scale. The EIS  
 3420 has high internal consistency, and has been validated extensively (Pinel et al., 2014).  
 3421

3422 *Inventory of Interpersonal Problems-32* (IIP-32; Horowitz, Alden, Wiggins, & Pincus, 2000). To  
 3423 assess interpersonal problems, participants will complete the 32-item circumplex version of the IIP.  
 3424 This widely used instrument reflects interpersonal inhibitions and excesses, with each item rated on a  
 3425 5-point scale. Higher total scores indicate more interpersonal problems. The IIP-32 also has 8  
 3426 subscales (Domineering, Vindictive, Intrusive, Cold, Socially Inhibited, Nonassertive, Overly  
 3427 Accommodating, and Self-Sacrificing) that comprise a circumplex of problematic interpersonal  
 3428 behavior around the main interpersonal dimensions of affiliation and control. Like the original measure

3429 (Horowitz, Rosenberg, Baer, Ureno, & Villansenor, 1988), the IIP-32 has evidenced good  
 3430 psychometric properties.

3431  
 3432 (3) RA administered diagnostic assessment (baseline and posttreatment):  
 3433

3434 *M.I.N.I. 7.0.2 International Neuropsychiatric Interview* (M.I.N.I.; Sheehan et al.,  
 3435 2016). The M.I.N.I. is a brief, structured diagnostic interview for DSM-5 and International  
 3436 Classification of Diseases (ICD; World Health Organization, 2008) psychiatric disorder classification.  
 3437 With its administration time of approximately 15 minutes, the M.I.N.I. is the psychiatric interview of  
 3438 choice in clinical trials and epidemiological studies. Despite its brevity, its psychometric properties  
 3439 compare favorably to longer instruments like the *Structured Clinical Interview for DSM* (SCID; First,  
 3440 Spitzer, Gibbon, & Williams, 1996). As part of the diagnostic evaluation, the RAs will complete the  
 3441 *Clinical Global Impression* (CGI), a widely used observer-rated scale that includes a 0-7 judgment of  
 3442 illness severity for which higher scores indicate more extreme illness.

3443  
 3444 (4) Patient phase 2 during-treatment measures:

3445  
 3446 TOP-CS, SCL-10, EIS, IIP-32. All described previously.  
 3447

3448 *Working Alliance Inventory-Short Form, patient version* (WAI-SF-P; Tracey,  
 3449 & Kokotovic, 1989). The WAI is the most widely used alliance measure, assessing  
 3450 patient-therapist agreement on the goals and tasks of treatment, and the quality of their relational bond.  
 3451 This 12-item short form, assessing these dimensions from the  
 3452 patient's perspective, has demonstrated sound psychometric properties.

3453  
 3454 *Credibility/Expectancy Scale, patient version* (CEQ; Devilly & Borkovec, 2000). The CEQ is the most  
 3455 widely used and psychometrically sound measure of the patient's  
 3456 perceived logicalness of a given treatment and expectation for the personal efficacy of that treatment.  
 3457

3458 (5) Therapist phase 2 during-treatment measures:

3459  
 3460 *Working Alliance Inventory-Short Form, therapist version* (WAI-SF-T; Tracey & Kokotovic, 1989).  
 3461 This is the parallel version of the WAI-SF described above, though now as rated from the therapist's  
 3462 perspective.  
 3463

3464 *Credibility/Expectancy Scale, therapist version* (CEQ; Devilly & Borkovec, 2000). This is the parallel  
 3465 version of the CEQ described above, though now as rated from the therapist's perspective (i.e., the  
 3466 therapist's sense of how logical the patient sees the treatment and how optimistic the patient is about  
 3467 receiving benefit from it).  
 3468

3469 (6) Patient phase 2 posttreatment measures:

3470  
 3471 TOP-CS, TOP-CM, SCL-10, EIS, IIP-32. All described previously.  
 3472

3473 *TOP-Satisfaction with the Treatment Process* (TOP-STP; Kraus et al., 2005). This 32-item measure  
 3474 assesses patient's satisfaction with their provider, the treatment they received, and the treatment milieu  
 3475 (e.g., staff, other patients, etc.).  
 3476

3477 (7) Therapist phase 2 posttreatment measure:

3478  
 3479 *Nature of Termination Form* (NTF). This measure was developed by the research team to assess the  
 3480 nature of patients' termination from the provider's open-ended perspective, as well as through a choice  
 3481 format of unilateral/patient-generated, unilateral/therapist-generated, or mutual. Therapists can also  
 3482 describe in an open-ended format any unusual or noteworthy circumstances that may have led to the  
 3483 termination of therapy with this client (e.g., transfer of client to another therapist).  
 3484

3485 (8) Patient phase 2 subsample follow-up measures:  
 3486  
 3487 TOP-CS, TOP-CM, SCL-10, EIS, IIP-32. All described previously.  
 3488

3489 (9) Stakeholder exit interview protocols (patient and therapist versions)  
 3490

3491 **b. State if audio or video taping will occur. Describe what will become of the tapes after use, e.g.,**  
 3492 **shown at scientific meetings, erased. Describe the final disposition of the tapes.**

3493 For the baseline and posttreatment patient assessments during phase 2, RAs will administer via  
 3494 teleconference the semi-structured diagnostic interview (M.I.N.I.), which will be audiorecorded. This  
 3495 will allow a different RA to review the recording and to make independent diagnostic and symptom  
 3496 severity determinations. With these two sets of ratings, we can then calculate interrater reliability on  
 3497 baseline and posttreatment diagnosis.  
 3498

3499 Audio recordings from the baseline diagnostic assessments will be digitally stored through the secure  
 3500 web-conferencing service. All data will be encrypted and password protected. Only the necessary  
 3501 research team members will know the login and password information and have the capacity to access  
 3502 the recordings. When it is time to analyze the recordings for reliability coding, designated, trained RAs  
 3503 will also have access to the recordings. The RAs, of course, will have completed the mandatory ethics  
 3504 training in human subjects' research, data management, and HIPAA compliance. These RAs will be  
 3505 independent evaluators who will not have access to other therapist or patient data. The recordings  
 3506 themselves will not be labeled with any identifiable information. The PI will routinely monitor the  
 3507 collection and analysis of recorded data.  
 3508

3509 After the recordings have been assessed for diagnostic reliability, the files will be securely deleted by  
 3510 the sponsored project contract term date of 6/16/20. No audio data or identifiable text data stemming  
 3511 from the recordings will be presented at meetings or in published articles. Only the reliability  
 3512 coefficients will be disseminated with the results of the full trial.  
 3513

3514 **c. State if deception will be used. If so, provide a rationale and describe debriefing procedures.**  
 3515 **Submit a debriefing script in Section #11 (Attachments).**

3516 Although the protocol does not involve deception, it does involve incomplete  
 3517 disclosure in Phase 2 given that participants are not given all of the information  
 3518 about the study until debriefing. Thus, in the debriefing form, we provide  
 3519 participants the opportunity to withdraw their data upon learning the full scope of  
 3520 the research.  
 3521

3522 **3. Background**  
 3523

3524 **a. Describe past findings leading to the formulation of the study.**

3525 Research has consistently identified significant variability in skill and outcomes between therapists  
 3526 (Baldwin & Imel, 2013; Boswell et al., 2013; Westra, Constantino, Arkowitz, & Dozois, 2011), even  
 3527 when therapists utilize an empirically supported treatment (EST). In fact, differences between  
 3528 treatment providers account for a greater portion of treatment outcome variance than the specific  
 3529 interventions delivered in controlled trials (Krause, Lutz, & Saunders, 2007; Wampold & Imel, 2015).  
 3530 Thus, improvements in MHC can occur by identifying effective providers in addition to promoting  
 3531 ESTs (Kraus et al., 2007).  
 3532

3533 In the largest study to date on this topic, our team investigated therapists' naturalistic treatment  
 3534 outcomes over many different problem domains (e.g., depression, anxiety, substance use, mania, sleep)  
 3535 in a sample of 6,960 patients and nearly 700 providers (Kraus, Castonguay, Boswell, Nordberg, &  
 3536 Hayes, 2011). The majority of therapists demonstrated a differential pattern of effectiveness depending  
 3537 on the problem domain, and therapist domain-specific effectiveness correlated poorly across domains  
 3538 suggesting that therapist competencies may be domain-specific, rather than reflecting a core attribute  
 3539 or general underlying therapeutic skill. Importantly, although some therapists demonstrated  
 3540 effectiveness over multiple problem domains, no therapists demonstrated reliable effectiveness across

3541 all domains. Further, a small, but notable 4% of the therapists did not demonstrate effective outcomes  
 3542 on any domain. These data suggest that in any population of therapists (payer network, hospital, or  
 3543 community mental health  
 3544 system), there is an opportunity for behavioral health to do what medicine did decades ago – encourage  
 3545 provider specialization. Virtually every clinician has an area where they are above average (82-96%;  
 3546 Kraus et al., 2011, 2016), and our research suggests that if they specialize to their unique skills,  
 3547 population-level outcomes (i.e., symptom reduction, behavior change, increased functionality) will  
 3548 improve dramatically. This would reflect a major, and likely highly impactful shift to current MHC  
 3549 systems.

3550  
 3551 However, patients and referrers are typically unaware of the unique track record (“report cards”) of  
 3552 local-area providers, which represents a critical gap in knowledge transfer within the MHC system.  
 3553 Without systematically collecting and disseminating performance report cards, stakeholders (e.g.,  
 3554 patients, therapists, administrators responsible for case assignment, primary care physicians) lack vital  
 3555 information on which to base MHC choices and referral decisions, and that can inform personalized  
 3556 treatment (Boswell, Constantino, Kraus, Bugatti, & Oswald, 2015). Conversely, there is potentially  
 3557 immense advantage to matching patients to providers based on scientific outcome data (Constantino,  
 3558 Boswell, Bernecker, & Castonguay, 2013).

3559  
 3560 Consistent with this notion, the Institute of Medicine (IOM) has made recommendations to: (a)  
 3561 customize care based on the patient’s needs, (b) share knowledge, (c) engage in data-driven decision-  
 3562 making, (d) promote transparency (including information on performance and patient satisfaction;  
 3563 Kohn, Saxena, Levav, & Saraceno, 2004), and (e) use valid and reliable assessment instruments to  
 3564 assess progress and to aid decision-making. The IOM has also recommended that MHC patients be  
 3565 provided with information on the quality of practitioner care (e.g., provider report cards) and use this  
 3566 information when making treatment decisions. Importantly, we have survey data that point to MHC  
 3567 patients, therapists, and administrators endorsing such applied knowledge transfer as a high priority  
 3568 (Boswell et al., 2015). Provider track record report cards are meaningful data to the MHC patient  
 3569 population, as are the mental health benefits that could stem from being well matched to provider.

3570  
 3571 We have developed over the past 20 years an innovative, technology-based mechanism/intervention to  
 3572 deliver report cards and drive this match concept within a patient-centered MHC model (Kraus et al.,  
 3573 2011). Our longitudinal data suggest that our match algorithm, based on our multidimensional outcome  
 3574 tool (the TOP) is efficacious for MHC outcomes. In addition to our study highlighted above (Kraus et  
 3575 al., 2011), a more recent prospective study of 59 therapists and 3,540 patients resulted in a between-  
 3576 treatment controlled Cohen’s  $d$  effect size of .80 (Kraus et  
 3577 al., 2016). Each therapist’s first 30 patients were used to classify a therapist’s skills in the 12 domains  
 3578 of symptoms and functioning as either statistically above average, average, or below average. The best  
 3579 matching algorithm functioned as follows: for each new, successive patient, he or she was classified as  
 3580 well-matched if the risk of harm was eliminated (i.e., the therapist was not below average when  
 3581 treating any elevated domain) and the therapist was above average in treating the patient’s three most  
 3582 out-of-the-norm domains (e.g., depression, suicidality, and panic). Poorly matched patients had below  
 3583 average outcomes, with small effect sizes ( $d = .30$ ) Well-matched patients, by contrast, achieved very  
 3584 large pre- vs. posttreatment effect sizes of  $d = 1.19$ . These data lend strong support that the proposed  
 3585 comparative effectiveness research (CER) will yield similar results (i.e., increased efficacy and  
 3586 reduced harm) in realigning the skills of a large population of therapists in one of the forerunner  
 3587 Accountable Care Organizations (our partner PsychBC) when matching empirically derived therapist  
 3588 skills with patient need. The technology/intervention is well established, it has demonstrated efficacy,  
 3589 and awaits investigation in a well-powered RCT.

#### 3590 3591 3592 4. Subject Population 3593

- 3594 a. **State how many subjects you propose to use and state the rationale for the proposed number.**  
 3595 For the primary 3-level hierarchical model assessing treatment condition effects at the patient level on  
 3596 linear change rates within patients, we used Raudenbush and Liu’s (2001) formula as incorporated in

3597 the Optimal Design program to determine the minimum numbers of therapists and patients needed to  
 3598 detect a moderate effect of condition (standardized difference between change rates = .50). With a  
 3599 minimum of 6 measurements spaced over the maximum 16 treatment weeks and assuming 5 patients  
 3600 per therapist, an intra-class correlation of .15, and an alpha of .05, we will need a total of 44 therapists  
 3601 and 220 patients to achieve a power of .80 to detect moderate condition effects on linear change rates.  
 3602 Factoring a 20% dropout rate at the patient level, running our experiment on 264 patients (6 per  
 3603 therapist) should provide sufficient statistical power to detect group differences on our primary  
 3604 outcome variables.

3605  
 3606 To summarize, based on this power analysis, we will for phase 1 access a naturalistic baseline  
 3607 assessment of a minimum of 44 consenting therapists' performance across a minimum of 15 cases to  
 3608 determine their strengths in treating the risk-adjusted domains measured by the TOP. We will then  
 3609 recruit a minimum of 264 patients for the phase 2 trial, assigning patients to the same 44 therapists  
 3610 who participated in phase 1 (they will see 6 cases each during the trial).

- 3611  
 3612 **b. Describe the subject population, including the age range, gender, ethnic background, and type of**  
 3613 **subjects (e.g. students, professors, subjects with learning disabilities, mental health disorders,**  
 3614 **etc.). Please incorporate specific inclusion/exclusion criteria (e.g. physical and psychological**  
 3615 **health, demographic information, or other unique characteristics).**

3616 Therapist participants: As noted, our target sample is 44 therapist participants (age *range* = 30-65  
 3617 years) who will be social workers, psychologists, and licensed clinical counselors. Reflecting  
 3618 PsychBC's therapist pool demographics, we anticipate that our provider sample will break down as  
 3619 follows: approximately 70% will be female; 88% will be white/non-Hispanic, 3% Black, 2% Hispanic,  
 3620 2% "Other/mixed," and 5% Asian. Based on these projections and our power analysis, our  
 3621 targeted/planned therapist enrollment is indicated in an attached Targeted/Planned Enrollment Table  
 3622 (Therapists).

3623  
 3624 Patient participants: Patient participants will be 264 adult men and women (age 18-70) in PsychBC's  
 3625 referral stream (largely Cleveland clinic and primary care [PCP] practice). Recruitment to the study  
 3626 simply means a willingness to be randomized to condition and to complete supplemental assessments  
 3627 (for monetary compensation) at baseline, at regular intervals during treatment, and at posttreatment. As  
 3628 this is an effectiveness design with a premium on ecological validity and scalability, virtually all  
 3629 patients in the PsychBC network will be eligible. It is most likely that the sample will be predominated  
 3630 by the following problem domains: depression, panic, substance abuse, and poor quality of life. The  
 3631 only study-related, patient-level exclusion criterion will be patients who are not the primary, informed  
 3632 decision-maker for their care. Thus, patients will present with a multitude of presenting problems  
 3633 across a spectrum of *Diagnostic and Statistical Manual of Mental Disorders* (5th ed.; *DSM-5*)  
 3634 diagnoses. The composition of our sample will roughly match the average utilization data for age,  
 3635 gender, and race/ethnicity at PsychBC. Based on these projections and our power analysis, our  
 3636 targeted/planned patient enrollment is attached in an Estimated Final Racial/Ethnic and Gender  
 3637 Enrollment Table (Patients).

- 3638  
 3639 **c. State the number and rationale for involvement of potentially vulnerable subjects to be entered**  
 3640 **into the study, including minors, pregnant women, prisoners, economically and educationally**  
 3641 **disadvantaged, decisionally challenged, and homeless people.**

3642 We are not specifically targeting these specific vulnerable populations, and our research design and/or  
 3643 the PsychBC care system will specifically exclude minors and prisoners. However, given the  
 3644 effectiveness design focused on maximizing ecological validity, some of our patients are sure to have  
 3645 economic and educational vulnerabilities, which are risk factors for mental health issues. Some women  
 3646 might also be pregnant.

- 3647  
 3648 **d. If women, minorities, or minors are not included, a clear compelling rationale must be provided.**  
 3649 Minors will be excluded because they are typically not solely responsible for their own treatment  
 3650 decisions, and the outcome measure used in this study, and on which the match manipulation is based,  
 3651 focuses on adults.  
 3652

- 3653 e. **State the number, if any, of subjects who are laboratory personnel, employees, and/or students.**  
 3654 **They should be presented with the same written informed consent. If compensation is allowed,**  
 3655 **they should also receive it.**  
 3656 N/A  
 3657
- 3658 f. **State the number, if any, of subjects who are involved in research conducted abroad and**  
 3659 **describe any unique cultural, economic or political conditions.**  
 3660 N/A  
 3661
- 3662 g. **Describe your procedures for recruiting subjects, including how potential subjects will be**  
 3663 **identified for recruitment. Attach advertisements, flyers, etc. in Section #11 (Attachments). Note:**  
 3664 **Potential subjects may not be contacted before IRB approval.**  
 3665 Therapist participants:  
 3666
- 3667 Recruitment will be coordinated among our UMass-employed PC, the PsychBC-employed PC, clinic  
 3668 staff members, and the Co-PIs, and will involve presenting information about the study (both phases 1  
 3669 and 2) to providers through verbal script at staff meetings or by email. At this preliminary recruitment  
 3670 stage, this information will be used to heighten awareness about the study and to garner interest in  
 3671 participating. The PsychBC PC will then provide the UMass PC (via email) the names of providers  
 3672 who expressed interest in learning more about the study. The UMass PC will subsequently contact  
 3673 interested therapist participants via email or teleconference (whichever is more convenient for the  
 3674 provider) to provide more study details/procedures and to direct the provider to an online consent form  
 3675 and survey. Providers remaining interested will access the secure study website to provide formal  
 3676 consent and to complete the baseline survey to which they will be directed after consenting. Therapists  
 3677 will be told that the study is examining various referral processes that will not affect their delivery of  
 3678 treatment-as-usual. They will be informed that they will be blind to the specific nature of the referral  
 3679 manipulation in phase 2, but will be fully debriefed following the entire study and offered an  
 3680 opportunity to provide feedback on their experience. Therapists will also be informed of the  
 3681 assessments in which their study patients will engage in both phase 1 (which is standard practice) and  
 3682 phase 2 (though they will not have access to the phase 2 research data at any time). Therapists will also  
 3683 need to consent to completing the aforementioned baseline survey prior to phase 1, as well as a few  
 3684 study-specific measures for each patient during the phase 2 RCT.  
 3685
- 3686 Patient participants:  
 3687
- 3688 Phase 2 marks the beginning of *patient* recruitment into the RCT. Recruitment to the study simply  
 3689 means a willingness to be randomized to condition and to complete supplemental assessments (for  
 3690 monetary compensation). Patients will flow into PsychBC via electronic or self-referrals. At initial  
 3691 contact, the PsychBC PC will ask patients for permission to be contacted by study personnel (i.e., the  
 3692 UMass PC) if they are interested in learning more about participation. If they are, they will be asked by  
 3693 the PsychBC PC to sign an authorization agreement (included in the consent form) to allow their  
 3694 contact information to be shared with the research team. The PsychBC PC's role is restricted to this  
 3695 recruitment task and administration of authorization to release the limited PHI; thus, no PsychBC  
 3696 personnel will be engaged in human subjects' research.  
 3697
- 3698 The PsychBC PC will provide the UMass PC with a daily list of referrals who have provided signed  
 3699 authorization to be contacted about the study. The UMass PC will then contact eligible patients to  
 3700 schedule a baseline consent/assessment. If a patient agrees to engage in a consent/baseline assessment  
 3701 session, the PC will schedule a teleconference diagnostic interview via a secure platform with a trained  
 3702 graduate clinical psychology research assistant (RA). During this session, the RA will first review the  
 3703 study details/procedures and respond to any questions. Patients will be told that the study is examining  
 3704 various referral processes that will not affect their treatment; they will be kept unaware of the specific  
 3705 nature of the referral manipulation, but will be told that they will be fully debriefed following the study  
 3706 and offered an opportunity to provide feedback on their experience (via an exit interview). They will  
 3707 also be told that although their participation in the trial will largely mimic the same treatment that they  
 3708 would receive if they were not participating, they must consent to be randomized, complete extra

3709 study-specific measures (before, during, and after treatment), complete an audio-recorded diagnostic  
 3710 interview (before and after treatment), and accept assignment to a clinician who will deliver individual  
 3711 psychotherapy. Patients will also be asked to remain with the same therapist through at least 16 weeks  
 3712 of treatment; however, if they request a transfer earlier, this will be treated as a dropout point for the  
 3713 sake of the trial. If the patient consents to be enrolled, they will sign the consent form and complete a  
 3714 baseline survey of measures (i.e., the TOP-CR, TOP-CS, and TOP-CM, a brief measure of global  
 3715 distress, a measure of existential isolation, and a measure of interpersonal problems) through a secure  
 3716 online platform linked to their typical TOP administration. Next, the trained RA will administer (on the  
 3717 same individual teleconference) the M.I.N.I. Following PsychBC's standard intake process and this  
 3718 research-focused baseline consent/assessment session, patients will be randomized to condition and  
 3719 assigned to a provider based on the experimental parameters of that condition (i.e., scientific match vs.  
 3720 pragmatic match).

3721  
 3722 **h. Compensation. Explain the amount and type of compensation (payment, experimental credit, gift**  
 3723 **card, etc.), if any, that will be given for participation in the study. Include a schedule for**  
 3724 **compensation and provisions for prorating.**

3725 Therapist participants:

3726  
 3727 Therapists will complete, in no longer than 25 minutes, a few study-specific measures as part of a  
 3728 phase 1 baseline survey for which they will be compensated \$20 in total (in the form of an Amazon  
 3729 gift card).

3730  
 3731 During Phase 2, therapists will also complete a few study-specific measures throughout treatment with  
 3732 each of the 6 participating patients treated during the phase 2 RCT; they will be compensated \$50 per  
 3733 patient for this additional, but minimal, time burden. The compensation will again be in the form of an  
 3734 Amazon gift card.

3735  
 3736 If therapists complete their measurement schedule through all possible contact points for a given  
 3737 participating patient (i.e., baseline + 16 treatment weeks = 17 weeks), or complete their measurement  
 3738 schedule through a planned termination for a participating patient that occurs prior to week 16 of  
 3739 treatment, they will receive full compensation (i.e., a \$50 gift card for that patient).

3740  
 3741 However, if a therapist withdraws from the study, they will have the option to be compensated on a  
 3742 prorated basis for the measures that they have already completed regarding each of their participating  
 3743 patients. This proration works out to approximately \$3 per week for a participating patient, which will  
 3744 be deducted for the number of weeks "missing" from therapists' assessment schedule (i.e., based on  
 3745 the point at which the therapist withdrew from the study). For example, if a therapist completes the  
 3746 measurement schedule for a given patient through week 8 (9 weeks, including baseline) and then  
 3747 withdraws from the study, they will have "missed" 8 weeks of data collection for that participating  
 3748 patient. Their compensation for this participating patient will be adjusted as follows: \$50 - \$24 (\$3 x 8  
 3749 weeks) = \$26. This adjustment will be completed for any and all relevant participating patients. To  
 3750 summarize, therapists who withdraw from the study will have the option either to (a) receive their  
 3751 relevant prorated compensation, or (b) to forgo prorated compensation in order to no longer be  
 3752 contacted by the research team.

3753  
 3754 If the therapist participates in an exit interview, he or she will receive full compensation in the form of  
 3755 an additional \$100 Amazon gift card.

3756  
 3757 Patient participants:

3758  
 3759 Patients in Phase 2 will undergo a semi-structured diagnostic interview at both baseline and  
 3760 posttreatment, as well as complete several study specific measures throughout treatment (and, if  
 3761 randomly selected, at a follow up); they will be compensated \$50 total for these non-routine aspects of  
 3762 their care. The compensation will be in the form of an Amazon gift card. If patients complete their  
 3763 measurement schedule through all possible contact points (i.e., baseline + 16 treatment weeks = 17  
 3764 weeks), or complete their measurement schedule through a planned termination that occurs prior to

3765 week 16 of treatment, they will receive full compensation. However, if they drop out of treatment prior  
 3766 to week 16, and their end point was not a planned termination that can be considered posttreatment for  
 3767 the purpose of the study, compensation will occur on prorated schedule. This works out to  
 3768 approximately \$3 per week, which will be deducted for the number of weeks “missing” from the  
 3769 schedule. For example, if a patient completes the measurement schedule through week 8 (9 weeks,  
 3770 including baseline), and they did not engage in a planned termination, they will have “missed” 8 weeks  
 3771 of data collection. Their compensation will be adjusted as follows:  $\$50 - \$24 (\$3 \times 8 \text{ weeks}) = \$26$ .  
 3772

3773 Patients who withdraw from the study (which is distinct from simply dropping out of treatment) will be  
 3774 given the option to (a) receive prorated compensation for the completion of measures up until the point  
 3775 of withdrawal (following the proration schedule outline above), or (b) to forgo prorated compensation  
 3776 in order to no longer be contacted by the research team.  
 3777

3778 If the patient participates in an exit interview, he or she will receive full compensation in the form of  
 3779 an additional \$100 Amazon gift card.  
 3780

3781 Finally, note that in the event that a participant (either a patient or therapist) withdraws from the study  
 3782 during phase 2, the other dyad member (either the patients seen by a withdrawing therapist or the  
 3783 therapist treating a withdrawing patient) will not be penalized; that is, as long as they have already  
 3784 consented to the study, they will receive the full amount of reimbursement (i.e., a \$50 gift card)  
 3785 regardless of the point at which their patient/therapist withdraws. However, note that consistent with  
 3786 the wishes of the participant, we will, of course, stop collecting data at the point of withdrawal (i.e., if  
 3787 therapists withdraw, we will stop collecting data from their patients who will be compensated fully; if  
 3788 patients withdraw, we will stop collecting data from their therapist regarding that patient and the  
 3789 therapist will be compensated fully for that patient).  
 3790

- 3791 **i. Please state: A: The total expected duration of the study, including the time expected for data**  
 3792 **analysis (e.g., This study is expected to last 1 year) AND B: How much time each subject is**  
 3793 **expected to be involved in the study (e.g., The involvement of each subject will be 1-session for a**  
 3794 **total of 90 minutes).**

3795 A) The project is funded in the form a cost-reimbursement contract for which a specific milestone  
 3796 schedule exists. The contract start date is 9/15/16 and the contract term date is 6/15/20. All analyses  
 3797 will be completed by the term date. Details are available in the attached updated milestone schedule.  
 3798

3799 B) Therapist subjects will be involved for 2 months in phase 1, as well as through the phase 2 trial  
 3800 (approximately 2 years, though with variability depending on when they have been assigned and have  
 3801 treated their 6 study cases). Patients in phase 2 only will be involved in the study protocol through their  
 3802 actual termination point or 16 weeks, whichever comes sooner (we will also conduct a follow-up  
 3803 outcome assessment at 1 year after termination on a randomly-selected subsample of 40 patients).  
 3804

## 3805 5. Risks

3806 HHS Regulations define a subject at risk as follows: “...any individual who may be exposed to the possibility of  
 3807 injury, including physical, psychological, or social injury, as a consequence of participation as a subject in any  
 3808 research...” This also includes risks to subject confidentiality and any discomforts, hazards, or inconveniences.  
 3809  
 3810

3811 For the categories below, include a description of risks.

- 3812 **a. Describe the risks related to:**

3813 **Physical well-being**

3814 None anticipated.  
 3815  
 3816

3817 **Psychological well-being**

3818 Regardless of condition, PsychBC will employ its usual triage assessments, therapists will employ  
 3819 their usual treatments, and patients will be receiving their usual care. Consequently, there are no risks  
 3820 from our research protocol over and above what would normally be expected in routine assessment and



3821 psychotherapy, and PsychBC has its usual clinical and safety protocols in place (and the clinical  
3822 personnel to execute them).

3823  
3824 In treatment, some individuals may experience emotional upset during sessions. Additionally, some  
3825 participants may experience disappointment with their rate of progress or setbacks. The risk associated  
3826 with such reactions will be addressed clinically by the therapists who are treating these issues and who  
3827 have peer and administrative support. To reiterate, these treatment risks would occur in the course of  
3828 treatment-as-usual. These are not additional risks stemming from the research protocol. Further, the  
3829 TOP outcome monitoring system, which is at the center of our research project, is already being used  
3830 by PsychBC providers without incident.

3831  
3832 As is typical in psychological research, some of the assessment questions from the research measures  
3833 may be experienced as intrusive and/or may cause anxiety. The risk from such increased anxiety,  
3834 however, is mitigated by the use of skilled and extensively trained assessors who are aware that such  
3835 reactions may be related to a person's presenting problems, or simply a function of the intimate and  
3836 emotionally intense nature of psychological services. In addition, the PIs, PCs, and/or PsychBC staff  
3837 and administrators will be available to meet with any participant who may be unduly disturbed due to  
3838 the few research tasks. Because the pre- and posttreatment diagnostic interviews will be conducted via  
3839 telephone, the graduate RA (being trained as a clinician and supervised by their site PI, Dr.  
3840 Constantino or Boswell, both of whom are licensed clinical psychologists and mental health care  
3841 providers) will have the patient's contact information (phone number and email address) on hand. If  
3842 the patient reveals clinically elevated suicidality or homicidality, the RA will contact 9-1-1 and report  
3843 the patient's contact information and location address (which they will request verbally, if necessary)  
3844 for emergency response. The RA, if applicable, will also execute any duty to warn to the best of their  
3845 ability (in addition to contacting the local authorities).

3846  
3847 **Economic well-being**

3848 Given that therapist performance data are being collected, it is reasonable to be concerned about  
3849 possible employment implications were an employer (i.e., clinic administrator) to attempt to interpret  
3850 study information incompletely (i.e., infer lack of therapist effectiveness to the point of questioning  
3851 employability). This risk, however, is extremely minimal for the following reasons:

3852  
3853 (1) As a condition of being involved in the study, clinic administrators will be required to agree that  
3854 therapists' participation or non-participation in this research will in no way affect their  
3855 standing/employment at their community mental health clinic.

3856  
3857 (2) The research team will not reveal therapist performance data to clinic administrators or staff  
3858 members; that is, the study could be considered "triple-blind." Neither patients nor therapists will  
3859 know when they are in an experimentally-matched vs. typically-matched dyad, and administrators/staff  
3860 members will not have access to the therapists' report cards.

3861  
3862 (3) However, administrators and staff members are required to be in the know about well-matched  
3863 therapist "short-lists," as this is essential to the research design; that is, when patients are randomized  
3864 to a well-matched therapist, those potential therapists need to be identifiable. It is possible that  
3865 administrators or staff members might misinterpret these data to suggest that a given therapist is  
3866 ineffective (if he or she is never or rarely showing up on a shortlist). However, we will guard against  
3867 this misinterpretation by educating administrators and staff members that the shortlist only represents,  
3868 in a small cross-section of time, therapists that have been shown to be effective on at least 1 of 12  
3869 domains, which represents a given patient's most severe problem at that time (the match criterion). We  
3870 will stress that this does not mean that a therapist is globally ineffective. It may just be that patients  
3871 randomly assigned to the match group are tending not to have the types of problems for which a given  
3872 therapist is relatively effective. That therapist, though, could be highly effective at treating one or even  
3873 many other domains.

3874  
3875 (4) Finally, administrators and staff members will not be told which therapists are or are not  
3876 participating in the study. Thus, lack of being on a shortlist, for all that they will know (unless a

3877 therapist openly reveals that he or she is participating in the study), could simply connote a choice to  
 3878 not participate in the project.  
 3879

3880 **Social well-being**

3881 None anticipated.  
 3882

3883 **Breach of confidentiality (including audio/video taping)**

3884 A breach of confidentiality represents a risk, but every step will be taken to minimize this risk.  
 3885 PsychBC and ORI routinely handle PHI and are in compliance with HIPAA regulations. Any “hard”  
 3886 materials (e.g., diagnostic assessment summaries) that are collected for research purposes only will be  
 3887 stored in a locked cabinet in the PI’s Psychotherapy Research Lab. There will be no hard copy data  
 3888 collected at the PsychBC clinic sites. Most of the data collected in this study (including consent) will  
 3889 be through a secure, web-based platform using a tablet or computer. This method offers greater  
 3890 protection because it guards against human error and negates the need for long-term storage of paper  
 3891 forms. Finally, digital recordings of diagnostic assessments will be stored in a secure, password  
 3892 protected website. The recordings themselves will be encrypted  
 3893

- 3894 **b. For research conducted internationally, describe any political or sociocultural**  
 3895 **considerations that may affect your research design (for example, in some communities it may**  
 3896 **not be customary to sign documents, etc.)**

3897 N/A  
 3898

- 3899 **c. Discuss plans for ensuring necessary medical or professional intervention in the event of a**  
 3900 **distressed subject.**

3901 The Co-PIs, project coordinator, PsychBC staff members, and PsychBC administrators will monitor  
 3902 the treatments and data collection; thus, they can assist in regularly monitoring any adverse events.  
 3903 Such negative occurrences are unlikely to be trial-related, as all patients will be receiving treatment-as-  
 3904 usual. Therefore, any adverse event will be addressed with PsychBC’s well-established procedures for  
 3905 monitoring services and managing treatment-related disturbances. Nevertheless, any adverse event will  
 3906 be recorded and immediately reported to the IRB (UMass), PCORI (funder), and the project’s Data  
 3907 Safety and Monitoring Board (DSMB).  
 3908

3909 Should, during the course of the study, a patient show evidence of psychological or physical  
 3910 deterioration, the patient will be assessed comprehensively in the domains of concern (except in the  
 3911 case of a life-threatening physical emergency, such as the emergence of acute chest pain, in which case  
 3912 9-1-1 will be called immediately). If the therapist deems that the patient meets criteria for a psychiatric  
 3913 hold (e.g., patient is an imminent danger to self or others), the therapist will arrange for the patient to  
 3914 be brought to the emergency department and will contact his/her PsychBC administrator and the PI to  
 3915 debrief. If a patient is not meeting criteria for a psychiatric hold, but is showing clear signs of  
 3916 decreased mental status, the therapist will continue to meet with the patient, as well as - in consultation  
 3917 with the PsychBC administrator - make arrangements for the most appropriate level of care.  
 3918

3919 As noted, because the pre- and posttreatment diagnostic interviews will be conducted via telephone,  
 3920 the graduate RA (being trained as a clinician and supervised by their site PI, Dr. Constantino or  
 3921 Boswell, both of whom are licensed clinical psychologists and mental health care providers) will have  
 3922 the patient’s contact information (phone number and email address) on hand. If the patient reveals  
 3923 clinically elevated suicidality or homicidality, the RA will contact 9-1-1 and report the patient’s  
 3924 contact information and location address (which they will request verbally, if necessary) for emergency  
 3925 response. The RA, if applicable, will also execute any duty to warn to the best of their ability (in  
 3926 addition to contacting the local authorities).  
 3927

3928 **6. Benefits**

- 3929  
 3930 **a. Describe the potential benefit(s) to be gained by the subjects or by the acquisition of important**  
 3931 **knowledge which may benefit future subjects, etc. (This DOES NOT include compensation or**  
 3932 **extra credit).**

3933 The most direct benefit a participant in this study may receive is the reduction of symptom-related  
 3934 distress and improved functioning. In addition, patients (especially those in the match condition) will  
 3935 receive more personalized MHC. Psychotherapists (especially those in the match condition) may  
 3936 experience a greater level of positive impact across their caseloads. Given that the actual treatments  
 3937 being provided will not be manipulated, the benefits of participation are judged to far outweigh the  
 3938 potential study-specific risks.

3939  
 3940 There is immense potential for future therapists and patients to benefit from the results of this study; if  
 3941 the hypotheses are supported, there will be cause for substantial revamping of MHC systems to  
 3942 capitalize on matching patients to therapists who have an empirically demonstrable track record of  
 3943 strength in treating patients with similar presenting problems.

## 3944 7. Procedures to Maintain Confidentiality

### 3945 a. Describe the procedures in place which protect the privacy of the subjects and maintain the 3946 confidentiality of the data, as required by the federal regulations, if applicable.

3947 Multiple steps will be taken to protect confidentiality. As mentioned, minimal paper forms (e.g.,  
 3948 diagnostic summary forms) will be kept in a locked cabinet in the PI's locked Psychotherapy Research  
 3949 Lab. There will be no hard copy data collected at the PsychBC sites. Virtually all of the data collected  
 3950 in this study (including consent) will be through a secure, web-based platform using a tablet or  
 3951 computer. This method offers greater protection because it guards against human error and negates the  
 3952 need for long-term storage of paper forms. Digital recordings of diagnostic assessments will be stored  
 3953 in a secure, password protected website. The recordings themselves will be encrypted.

3954 Only designated study personnel will have access to identifiable, study specific, private information  
 3955 about human subjects. When registering on the TOP system, as required by PsychBC's standard  
 3956 operating procedures, both patients and therapists are assigned a random number code that links all  
 3957 subsequent assessments and is separated from identifiable information. This random number code will  
 3958 function as each participant's study code and will be used to link participants' data. As noted, all  
 3959 therapist and patient data (outside of diagnostic assessment summaries and the TOP administrations)  
 3960 will be collected through a web-based platform. The assigned participant code will be used to  
 3961 link/aggregate information, so private information will not be requested after the baseline  
 3962 assessment/consent process. Only the PI and essential research staff will have access to the list that  
 3963 links identifiable information with the participant's study code. Any audio recordings will be encrypted  
 3964 and password protected. Only the Co-PIs will know this password and have the capacity to access the  
 3965 recordings. When it is time to analyze the recordings for reliability coding, designated, trained RAs  
 3966 will also have access to the recordings; however, they will not have access to additional identifiable  
 3967 information (only the information required to complete the analysis). For any data used for research  
 3968 and publication purposes, the confidentiality of participant information will be ensured.

### 3969 b. If information derived from the study will be provided to a government agency, or any other 3970 person or group, describe to whom the information will be given and the nature of the 3971 information.

3972 The PI is required to submit information (i.e., contractual "deliverables") on a regular basis to PCORI  
 3973 (the study sponsor), including IRB protocols, interim progress reports, advisory board meeting  
 3974 minutes, engagement plan updates, evidence of diagnostic criterion reliability from training cases,  
 3975 interim data reports, presentation abstracts and documentation of acceptance, manuscript copies, letters  
 3976 of endorsement from scientific and consumer groups, final data analysis summary, and final research  
 3977 report. Details on deliverables are available in the aforementioned (and attached and updated)  
 3978 milestone schedule. No PHI will be transmitted to PCORI.

### 3979 c. Specify where and under what conditions study data will be kept, how specimens will be labeled 3980 and stored (if applicable), who has access to the data and specimens, and what will be available 3981 to whom.

3982 As noted, minimal paper forms (e.g., diagnostic summary forms) will be kept in a locked cabinet in the  
 3983 PI's locked Psychotherapy Research Lab. There will be no hard copy research-only data collected at  
 3984  
 3985  
 3986  
 3987  
 3988

3989 the PsychBC sites. Virtually all of the data collected in this study (including consent) will be through a  
 3990 secure, web-based platform using a tablet or computer. Digital recordings of diagnostic assessments  
 3991 will be stored in a password protected website, and securely deleted by the project contract's term date.  
 3992 Only the relevant members of the research team will have access to the participants' data and only the  
 3993 PI will have long-term access to identifiable information. As noted, all assessments will be linked with  
 3994 a participant code. Any records linking the code to the participant's name or voice recording will be  
 3995 kept in a separate locked file cabinet in the PI's office. These records will be destroyed 5 years after  
 3996 the contract term date.  
 3997

## 3998 8. Potential Conflict of Interest

- 3999
- 4000 a. **Do any of the involved investigators or their immediate family (as described below) have**  
 4001 **consulting arrangements, management responsibilities or equity holdings in the Sponsoring**  
 4002 **company, vendor(s), provider(s) of goods, or subcontractor(s)? Y**
- 4003
- 4004 b. **Do any investigators or their immediate family have any financial relationship with the**  
 4005 **Sponsoring company, including the receipt of honoraria, income, or stock/stock options as**  
 4006 **payment? N**
- 4007
- 4008 c. **Is any Investigator(s) a member of an advisory board with the Sponsoring company? N**
- 4009
- 4010 d. **Do any investigators receive gift funds from the Sponsoring company? N**
- 4011
- 4012 e. **Do any investigators or their immediate family have an ownership or royalty interest in any**  
 4013 **intellectual property utilized in this protocol? Y**

4014

4015 "Immediate family" means a spouse, dependent children as defined by the IRS, or a domestic partner. If  
 4016 one or more of the above relationships exist, please include a statement in the consent form to disclose this  
 4017 relationship. i.e., a paid consultant, a paid member of the Scientific Advisory Board, has stock or stock  
 4018 options, or receives payment for lectures given on behalf of the sponsor. The consent form should disclose  
 4019 what institution(s) or companies are involved in the study through funding, cooperative research, or by  
 4020 providing study drugs or equipment. If you answer yes to any of the questions above, please go to the  
 4021 policies for more information.  
 4022

## 4023 9. Informed Consent

4024

4025 You can add different Consent Forms, Alteration Forms, and Waivers. Provide consent process background  
 4026 information, in the table below, for each Consent Form(s), Alteration Form(s), and Waiver(s).  
 4027

### 4028 9.1. Consent Form – therapist consent form revised

4029

4030 **Who is obtaining consent? The person obtaining consent must be knowledgeable about the study and**  
 4031 **authorized by the PI to consent human subjects.**

4032 UMass personnel only: either the PC or an RA.

4033

4034 **How is consent being obtained?**

4035 Therapists will meet or speak via teleconference with the UMass PC or an RA to learn about the study  
 4036 details/procedures and to provide formal consent through an online baseline survey to which they will be  
 4037 directed.  
 4038

4039 **What steps are you taking to determine that potential subjects are competent to participate in the**  
 4040 **decision-making process?**

4041 The PI and his collaborators will provide close oversight of the entire protocol, including regular  
 4042 consultations with a study Advisory Board and the DSMB.  
 4043

### 4044 9.2. Consent Form – therapist exit interview supplemental consent form

4045  
4046 **Who is obtaining consent? The person obtaining consent must be knowledgeable about the study and**  
4047 **authorized by the PI to consent human subjects.**

4048 The exit interviewer (i.e., RA or advisory board member).  
4049

4050 **How is consent being obtained?**

4051 If a therapist agrees to engage in an exit interview, the interviewer will review the study details/procedures  
4052 and obtain supplemental consent through an online link to which the therapist will be directed. Coercion  
4053 will be minimized by clearly stating that participation is voluntary.  
4054

4055 **What steps are you taking to determine that potential subjects are competent to participate in the**  
4056 **decision-making process?**

4057 If the interviewer interacts with a therapist who appears to have competency issues in the decision-making  
4058 process for engaging in the exit interview, they will immediately bring this concern to the PI or a Co-PI  
4059 before enrolling them. The team will then make an informed decision as to whether to include that person  
4060 in the interview protocol.  
4061

### 4062 **9.3. Consent Form – patient consent form revised**

4063  
4064 **Who is obtaining consent? The person obtaining consent must be knowledgeable about the study and**  
4065 **authorized by the PI to consent human subjects.**

4066 UMass personnel only: either the PC or an RA.  
4067

4068 **How is consent being obtained?**

4069 If a patient agrees to engage in a consent/baseline assessment session, the PC will schedule a telephone  
4070 diagnostic interview with a trained graduate clinical psychology RA (employed at either UMass or  
4071 University at Albany). The RAs will first review the study details/procedures and obtain consent through an  
4072 online baseline survey to which the patient will be directed. Coercion will be minimized by clearly stating  
4073 that participation is voluntary and will in no way impact the patient's treatment.  
4074

4075 **What steps are you taking to determine that potential subjects are competent to participate in the**  
4076 **decision-making process?**

4077 Competency for making one's own treatment decisions will be an inclusion criterion for the study.  
4078 Moreover, if a clinic staff member, the PC, or an RA interacts with a patient who appears to have  
4079 competency issues in the decision-making process for engaging in the study, they will immediately bring  
4080 this concern to the PI or a Co-PI before enrolling them. The team will then make an informed decision as to  
4081 whether to include that person in the study. The DSMB will be consulted if appropriate.  
4082

### 4083 **9.4. Consent Form – patient exit interview supplemental consent form**

4084  
4085 **Who is obtaining consent? The person obtaining consent must be knowledgeable about the study and**  
4086 **authorized by the PI to consent human subjects.**

4087 The exit interviewer (i.e., RA or advisory board member).  
4088

4089 **How is consent being obtained?**

4090 If a patient agrees to engage in an exit interview, the interviewer will review the study details/procedures  
4091 and obtain supplemental consent through an online link to which the patient will be directed. Coercion will  
4092 be minimized by clearly stating that participation is voluntary and will in no way impact the patient's  
4093 treatment.  
4094

4095 **What steps are you taking to determine that potential subjects are competent to participate in the**  
4096 **decision-making process?**

4097 Competency for making one's own treatment decisions will have been an inclusion criterion for the main  
4098 study. Moreover, if the interviewer interacts with a patient who appears to have competency issues in the  
4099 decision-making process for engaging in the exit interview, they will immediately bring this concern to the

4100 PI or a Co-PI before enrolling them. The team will then make an informed decision as to whether to include  
 4101 that person in the interview protocol. The DSMB will be consulted if appropriate.  
 4102

4103 **10. Assent Background**  
 4104

4105 All minors must provide an affirmative consent to participate by signing a simplified assent form, unless the  
 4106 Investigator(s) provides evidence to the IRB that the minor subjects are not capable of assenting because of age,  
 4107 maturity, psychological state, or other factors.  
 4108

4109 **11. Attachments**  
 4110

| Document Type              | Document Name                                                      | Attached Date |
|----------------------------|--------------------------------------------------------------------|---------------|
| Questionnaires             | Patient Phase 2<br>During-Treatment Measures<br>Packet             | 10/04/2016    |
| Questionnaires             | Therapist Phase 2<br>During-Treatment Measures<br>Packet           | 10/04/2016    |
| Questionnaires             | TOP-STP                                                            | 10/04/2016    |
| Questionnaires             | Stakeholder Exit Interview<br>Protocols                            | 10/04/2016    |
| Federal Grant/Sub-contract | PCORI IHS-1503-<br>28573_Constantino_executed contract             | 10/04/2016    |
| Federal Grant/Sub-contract | PCORI Original Contract<br>Proposal_all sections                   | 10/04/2016    |
| Other                      | Constantino Lab Personnel<br>Link- Google Docs                     | 10/04/2016    |
| Other                      | PCORI_Phase 2_Patient Data<br>Collection Email Template            | 11/13/2016    |
| Other                      | PCORI_Phase 2_Patient Data<br>Collection Reminder Call<br>Script   | 11/13/2016    |
| Other                      | PCORI_Phase 2_Therapist<br>Data Collection Email<br>Template       | 11/13/2016    |
| Other                      | PCORI_Phase 2_Therapist<br>Data Collection Reminder Call<br>Script | 11/13/2016    |
| Questionnaires             | MINI 7.0.2 Standard                                                | 11/13/2016    |
| Advertisements             | PCORI_Clinician<br>Recruitment_Verbal<br>Script_REVISED_clean      | 08/13/2017    |
| Advertisements             | PCORI_Clinician<br>Recruitment_Email_REVISED_clean                 | 08/13/2017    |
| Advertisements             | PCORI_Patient<br>Recruitment_Verbal<br>Script_REVISED_clean        | 08/13/2017    |
| Questionnaires             | PCORI_Clinician Consent &<br>Baseline Measures<br>Packet_REVISED   | 08/13/2017    |
| Questionnaires             | PCORI_Patient Consent &<br>Baseline Measures<br>Packet_REVISED     | 08/13/2017    |
| Questionnaires             | PCORI_Patient Posttreatment<br>Measures Packet_REVISED             | 08/13/2017    |

|                            |                                                                                   |            |
|----------------------------|-----------------------------------------------------------------------------------|------------|
|                            | w. debriefing form                                                                |            |
| Questionnaires             | PCORI_Clinician<br>Posttreatment Measures<br>Packet_REVISED w.<br>debriefing form | 08/13/2017 |
| Questionnaires             | TOP-CS & TOP-CM                                                                   | 08/13/2017 |
| Other                      | PCORI_Targeted Enrollment<br>Tables_REVISED_clean                                 | 08/13/2017 |
| Other                      | PCORI Milestone<br>Schedule_REVISED                                               | 08/13/2017 |
| Other                      | Participant Flow_REVISED                                                          | 08/13/2017 |
| Other                      | Data Collection Schedule<br>Revised                                               | 08/13/2017 |
| Federal Grant/Sub-contract | Constantino_IHS1503-28573_Mod<br>001 SUB_FE 20170808_FINAL<br>EXECUTED MOD        | 08/13/2017 |
| Other                      | PCORI IRB Proposal_R1_for<br>PsychBC_FINAL submitted                              | 08/13/2017 |
| Other                      | ORI-PBC_Business Associate<br>Agreement                                           | 08/13/2017 |

4111  
4112  
4113  
4114  
4115  
4116  
4117  
4118  
4119  
4120  
4121  
4122  
4123  
4124  
4125  
4126  
4127  
4128  
4129  
4130  
4131  
4132

### **Obligations**

Obligations of the Principal Investigator are: Modifications - Changes in any aspect of the study (for example, project design, procedures, consent forms, advertising materials, additional key personnel or subject population) will be submitted to the IRB for approval before instituting the changes; Consent Forms - All subjects will be given a copy of the signed consent form. Investigators will be required to retain signed consent documents for six (6) years after close of the grant or three (3) years if unfunded; Training - Human subject training certificates, including those for any newly added personnel, will be provided for all key personnel; Adverse Events - All adverse events occurring in the course of the protocol will be reported to the IRB as soon as possible, but not later than ten (10) working days; Continuing Review – IRB Protocol Report Forms will be submitted annually at least two weeks prior to expiration, six weeks for protocols that require full review; Completion Report - The IRB will be notified when the study is complete. To do this, complete the IRB Protocol Report Form and select “Final Report.” Training - Human subject training certificates, including those for any newly added personnel, will be provided for all key personnel; Adverse Events/Unanticipated Problems - All events occurring in the course of the protocol will be reported to the IRB as soon as possible, but not later than five (5) working days; Continuing Review - IRB Protocol Report Forms will be submitted annually at least two weeks prior to expiration, six weeks for protocols that require full review; Completion Report - The IRB will be notified when the study is complete. To do this, complete the IRB Protocol Report Form and select “Final Report.”

**The Principal Investigator has read and agrees to abide by the above obligations. Y**

4133 **Summary of a formal modification to the PCORI contract (January 2018); no revision to**  
4134 **the study protocol**

4135  
4136  
4137

**CONTRACT MODIFICATION SUMMARY**

4138 On January 8, 2018, PCORI approved a contract modification to IHS-1503-28573, which included the following  
4139 changes:

4140

4141 • We updated our patient enrollment target from 264 to 281 based on a more conservative attrition rate of  
4142 25% (up from our original, less conservative estimate of 20%). With this modification, enrolling 281  
4143 patients into the trial allowed us to meet our target of 211 usable case for final data analysis ( $281 * .75 =$   
4144  $211$ ). Based on this adjustment, we also updated accordingly our *Estimated Final Racial/Ethnic and*  
4145 *Gender Enrollment Table*.

4146

4147 • We updated our timeline and milestone schedule based on the PCORI-approved 6-month extension to the  
4148 contract end date. This no-cost extension was precipitated by delays in patient recruitment, which we  
4149 successfully addressed via our formal project remediation plan.

4150

4151 For this modification, there were no changes to the study protocol.

4152
