# Supplementary material
Source: PubMed Central journal article supplement (PMC8190692)
Supplement: jamapsychiatry-e211221-s003.pdf [file jamapsychiatry-e211221-s003.pdf]

## Data Sharing Statement

Constantino. Effect of Matching Therapists to Patients vs Assignment as Usual on Adult Psychotherapy Outcomes. *JAMA Psychiatry*. Published June 09, 2021. doi:10.1001/jamapsychiatry.2021.1221

### Data

**Data available:** No

### Additional Information

**Explanation for why data not available:** We cannot share de-identified data until 6 months following the publication of our peer-reviewed final research report for PCORI, which has not yet occurred. We will, though, maintain our de-identified data set indefinitely given possible future requests (e.g., to extract data for meta-analyses). Upon request on a case-by-case basis, we can share individual participant data (again, following full de-identification) that underlie results in a publication (e.g., data extraction for meta-analyses). Review requests, including a detailed plan for how the data will be used, should be directed via email to the PI, Dr. Michael Constantino ([constanm@umass.edu](mailto:constanm@umass.edu)). Dr. Constantino reserves the right to deny individual share requests if the usage details are questionable or unclear.
